# Supplementary material for: PAK2 is an effector of TSC1/2 signaling independent of mTOR and a potential therapeutic target for Tuberous Sclerosis Complex
Source: PubMed Central journal article supplement (PMC4585940; doi:10.1038/srep14534), 2015-09-28
Supplement: srep14534-s1.pdf [file srep14534-s1.pdf]

Supplementary Information belonging to:

**PAK2 is an effector of TSC1/2 signaling independent of mTOR and a potential therapeutic target for  
Tuberous Sclerosis Complex**

Maria M. Alves<sup>1#</sup>, Gwenny M. Fuhler<sup>1</sup>, Karla C.S. Queiroz<sup>2</sup>, Jetse Scholma<sup>1</sup>, Susan Goorden<sup>3</sup>, Jasper Anink<sup>4</sup>, C. Arnold Spek<sup>2</sup>, Marianne Hoogeveen-Westerveld<sup>5</sup>, Marco J. Bruno<sup>1</sup>, Mark Nellist<sup>5</sup>, Ype Elgersma<sup>3</sup>, Eleonora Aronica<sup>4,6</sup> and Maikel P. Peppelenbosch<sup>1\*</sup>

Contains:

**Supplementary Figure 1:** Correlation between kinome profiles of *Tsc 2*<sup>-/-</sup> and wild type MEFs.

**Supplementary Figure 2:** Verification of *Pak2* downmodulation upon siRNA treatment in *Tsc2*<sup>-/-</sup> MEFs

**Table S1:** PCR primers

**Supplementary Figures 3A-E:** Full blots belonging to Figure 2.

**Supplementary Figures 4A-C:** Full blots belonging to Figure 3.

**Table S2:** Kinomic changes in TSC<sup>-/-</sup> vs wild type MEFs

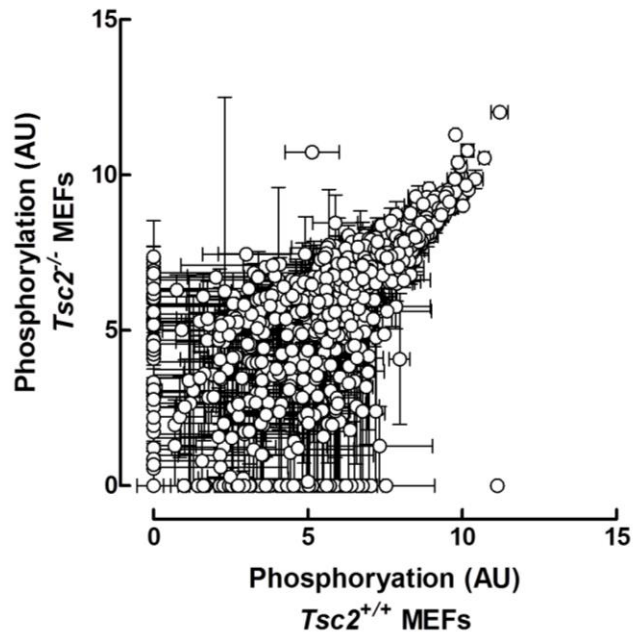

**Supplementary Figure S1: Correlation between kinome profiles of Wild-type ( $Tsc2^{+/+}$ ) and  $Tsc2^{-/-}$  MEF.** Phosphorylation of individual protein substrates are depicted. Mean of two independent experiments and technical triplicates is shown per substrate. Only reliable 'on' or 'off' spots are used for calculations.

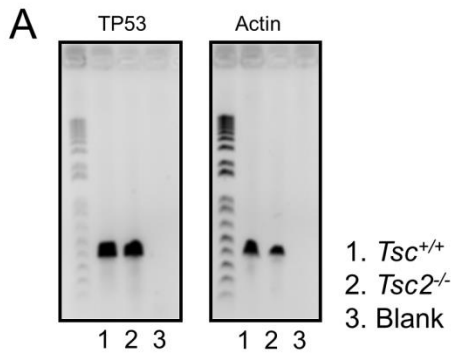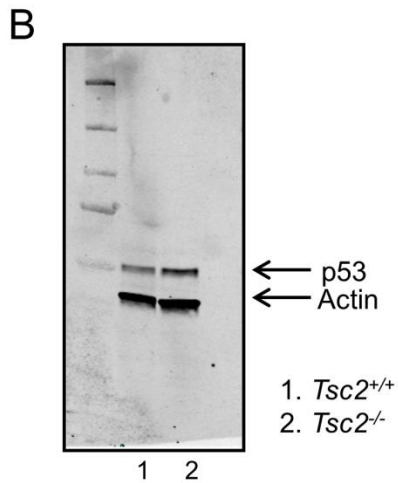

**Supplementary Figure S2: Confirmation of p53 expression in *Tsc2*<sup>-/-</sup> MEFs.** **A)** mRNA was isolated from *Tsc2*<sup>+/+</sup> and *Tsc2*<sup>-/-</sup> MEFs, and rt-PCR was performed (see **Supplementary Table 2** for primer details), showing similar TP53 expression in *Tsc2*<sup>+/+</sup> and *Tsc2*<sup>-/-</sup> MEFs (left panel). PCR for actin demonstrated equal mRNA input (right panel). **B)** Proteins were extracted from *Tsc2*<sup>+/+</sup> and *Tsc2*<sup>-/-</sup> MEFs, and p53 was detected by western blot analysis demonstrating the presence of p53 in both cell types. Equal loading was confirmed by probing the same membrane with anti-actin antibodies.

**Supplementary table 1: PCR primers**

| <b>Primer name</b> | <b>Sequence (5'-3')</b> |
|--------------------|-------------------------|
| Pak2qPCRf          | ATGATGAAGACGCTGCTCCT    |
| Pak2qPCRR          | TCTGAAGACTTGGCACCACT    |
| ActbqPCRf          | CCTCTATGCCAACACAGTGC    |
| ActbqPCRR          | CACACAGAGTACTTGCGCTC    |
| GapdhqPCRf         | CCTTCCGTGTTCCCTACCCC    |
| GapdhqPCRR         | GTCCTCAGTGTAGCCCAAGA    |
| <br>               |                         |
| Tp53F              | ACATAGCAAGTTGGAGGCCA    |
| Tp53R              | GACAAAAGATGACAGGGGCC    |
| ActbF              | ACGGCCAGGTCATCACTATT    |
| ActbR              | CACCCTACCAAGCTAAGGA     |

2A

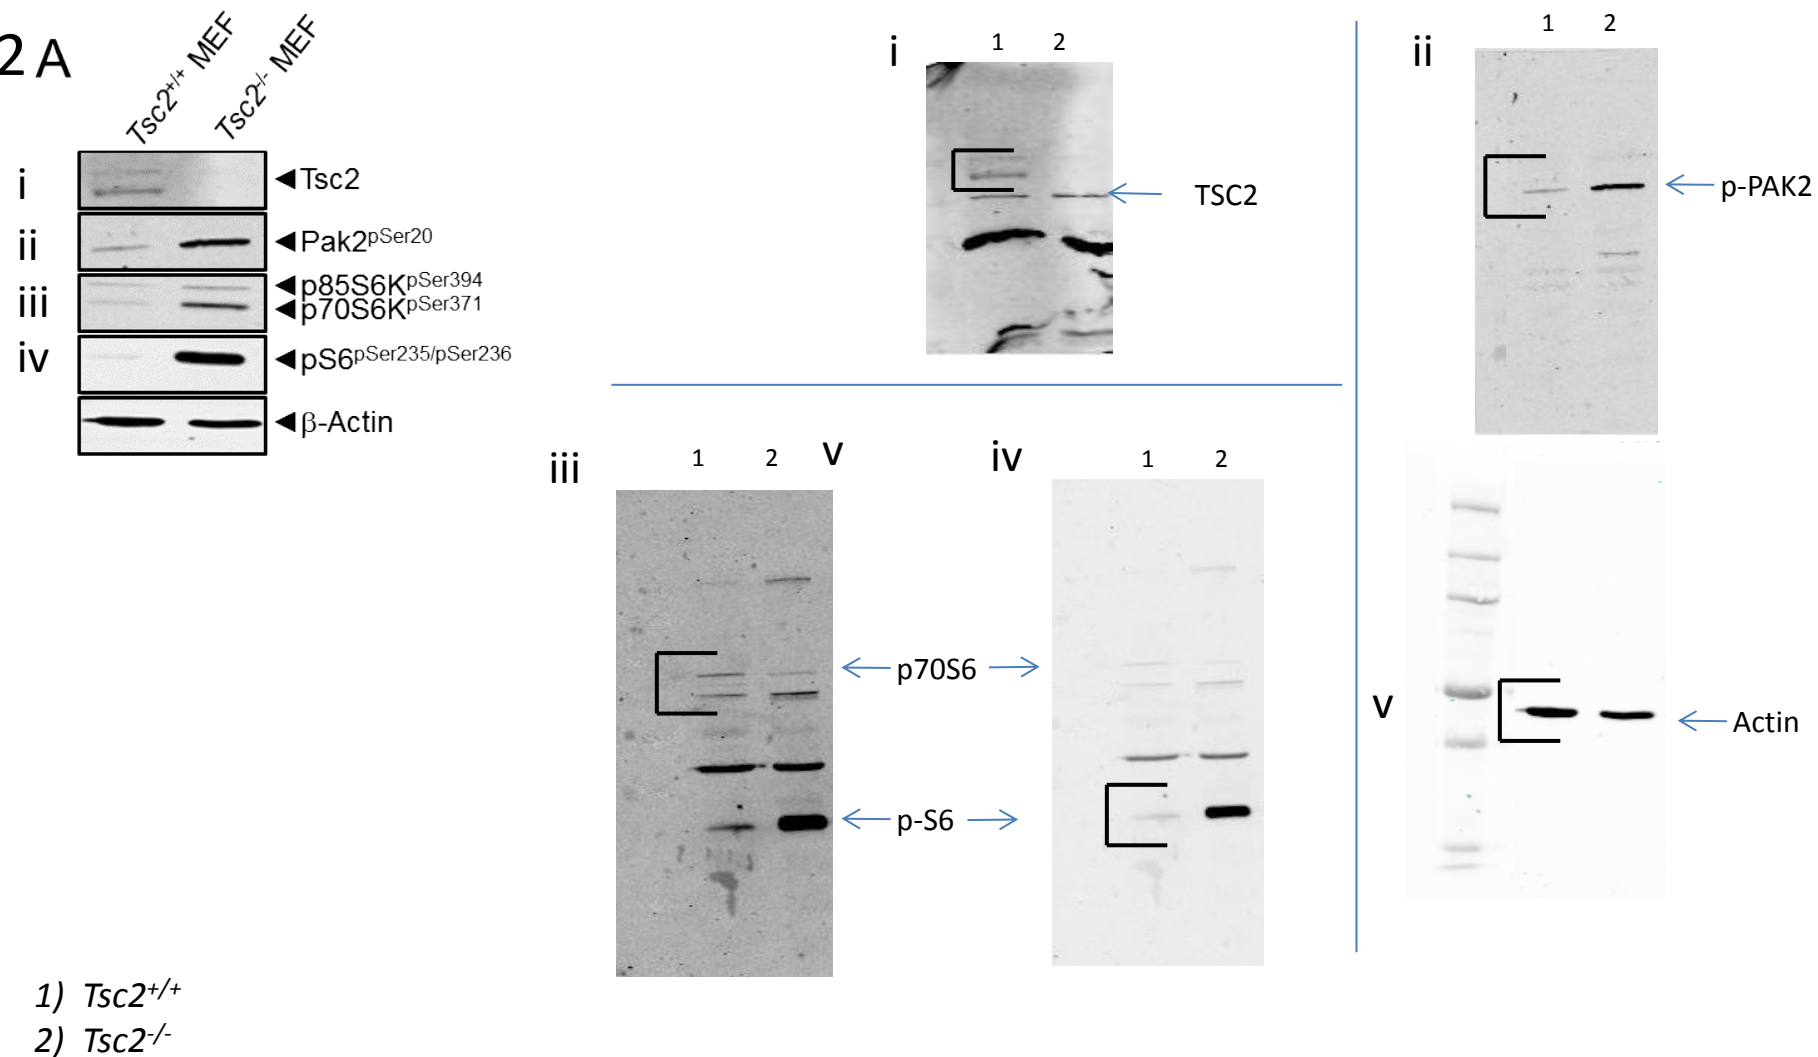

**Supplementary Figure S3A: Full length blots belonging to Figure 2A.** Top left corner: figure as presented in paper. Full length blots of individual panels are shown, croplines are indicated in black. Cell lysates were applied to three individual gels. One gel was used to blot p-P70S6 and p-S6 simultaneously. However the image selected for p-P70S6 resulted from a longer exposure of the same blot. p-PAK2 and TSC2 were blotted on the other two gels. The p-PAK blot was reprobbed for actin to confirm equal protein concentration in the lysates. The other blots were also reprobbed for actin, with identical results (not shown). All the blots were performed under the same conditions and the data was analysed in the same way for all the antibodies used. Croplines are indicated in the full length blots.

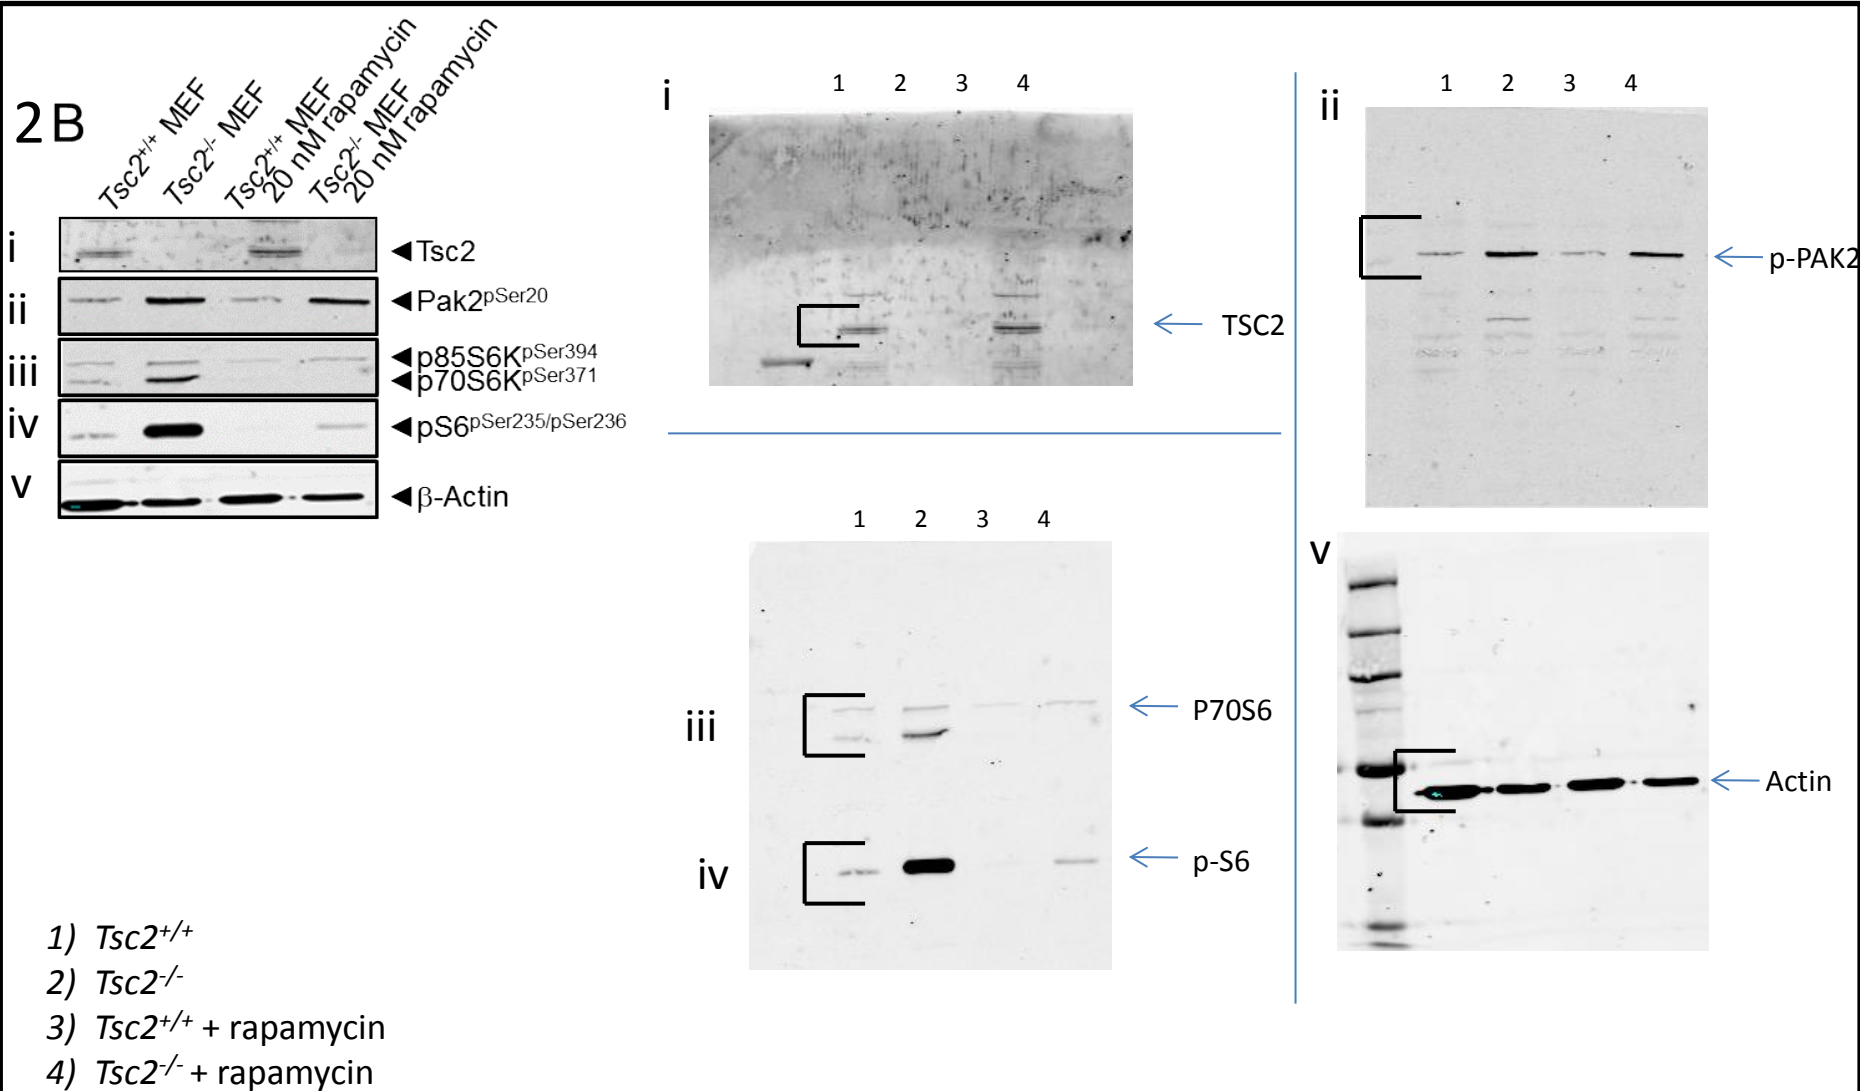

**Supplementary Figure S3B: Full length blots belonging to Figure 2B.** Top left corner: figure as presented in paper. Cell lysates were applied to three individual gels. One gel was used to blot p-P70S6 and p-S6 simultaneously. p-PAK2 and TSC2 were blotted on the other two gels. The p-PAK blot was reprobbed for actin to confirm equal protein concentration in the lysates. The other blots were also reprobbed for actin, with identical results (not shown). All the blots were performed under the same conditions and the data was analysed in the same way for all the antibodies used. Croplines are indicated in the full length blots.

2C

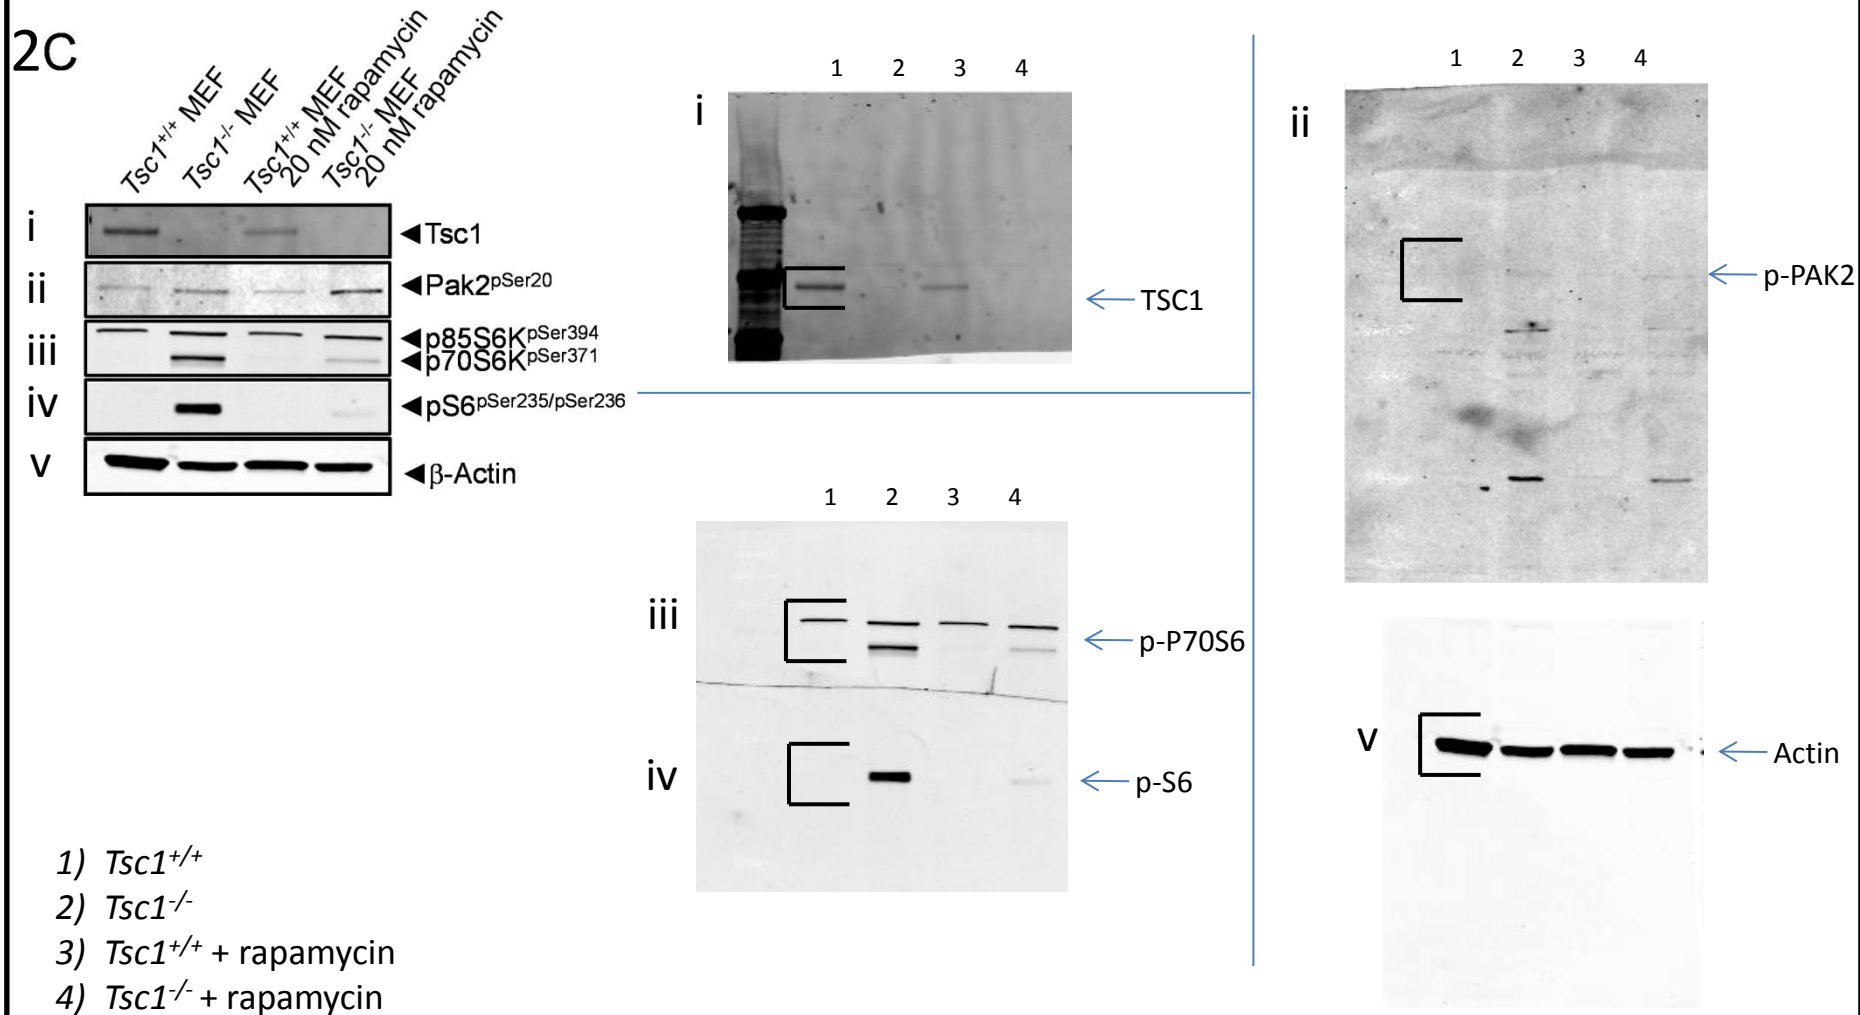

**Supplementary Figure S3C: Full length blots belonging to Figure 2C.** Top left corner: figure as presented in paper. Cell lysates were applied to three individual gels. One gel was used to blot p-P70S6 and p-S6 simultaneously. p-PAK2 and TSC2 were blotted on the other two gels. The p-PAK blot was reprobbed for actin to confirm equal protein concentration in the lysates. The other blots were also reprobbed for actin, with identical results (not shown). All the blots were performed under the same conditions and the data was analysed in the same way for all the antibodies used. Croplines are indicated in the full length blots.

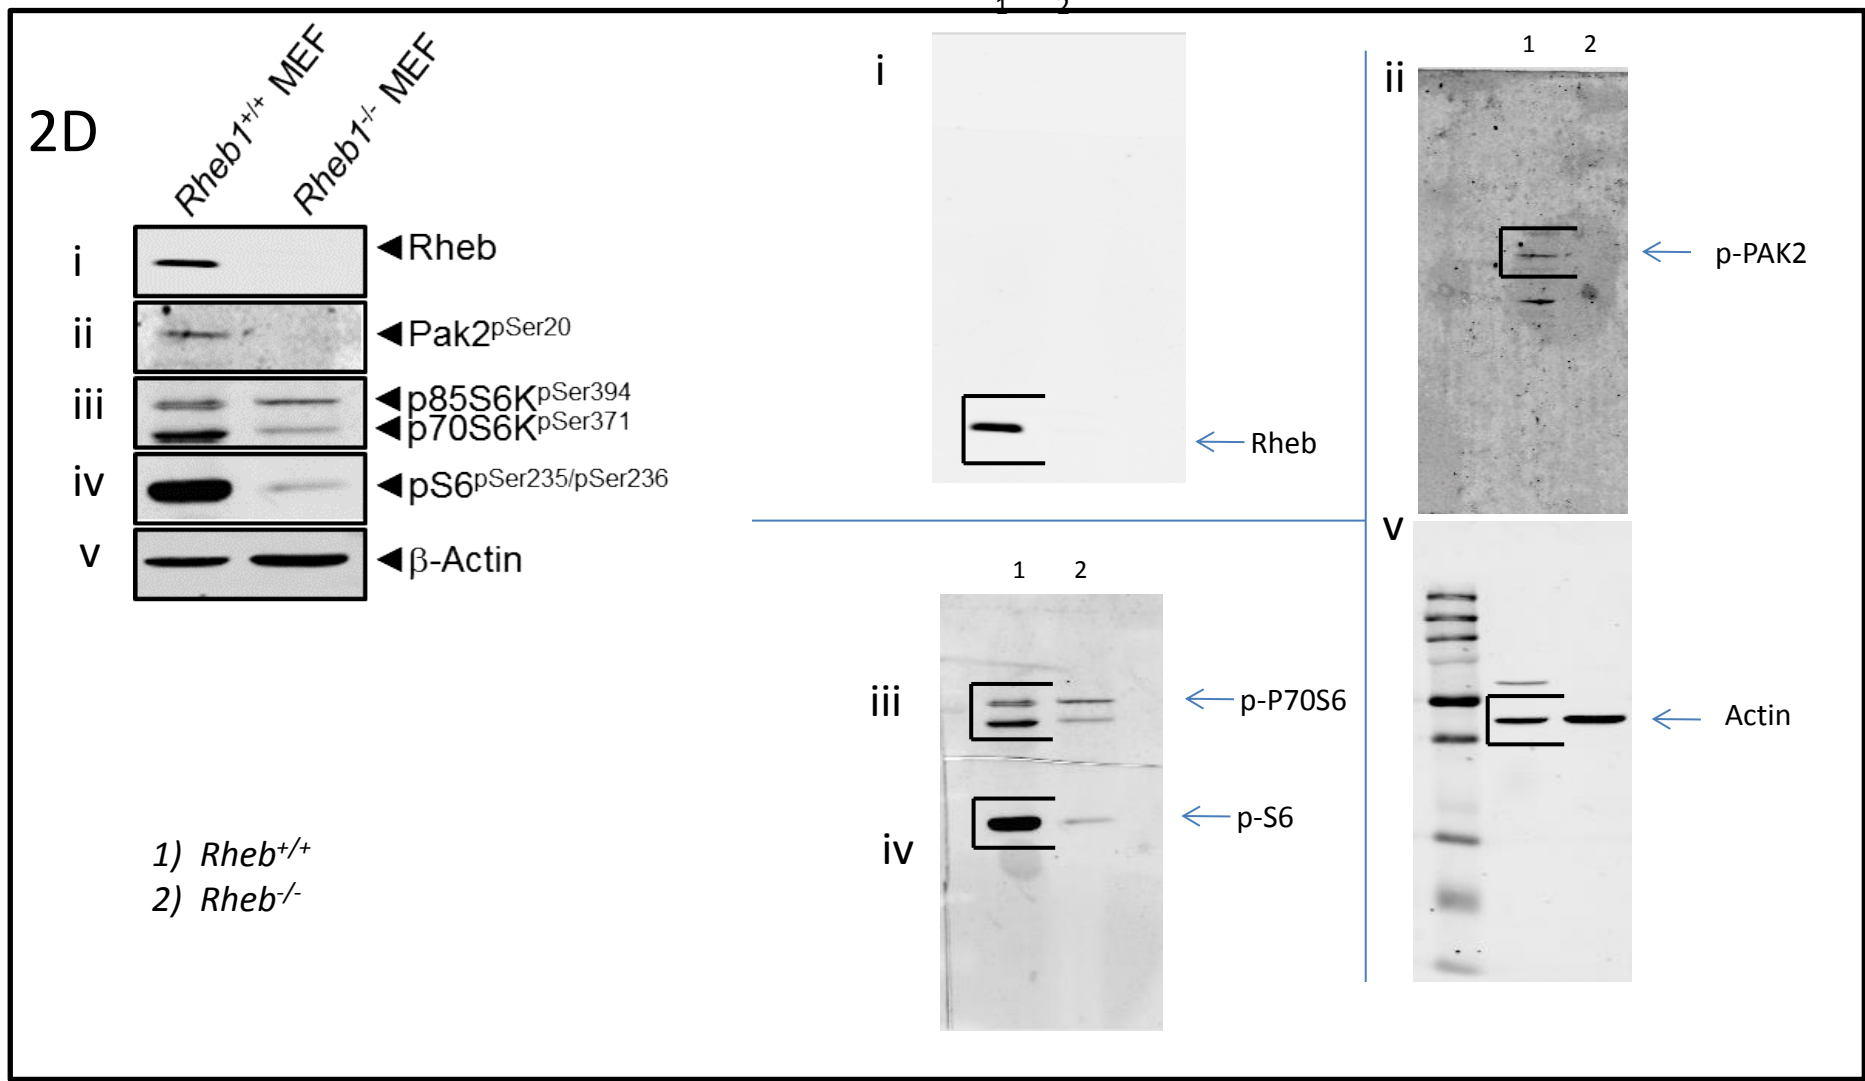

**Supplementary Figure S3D: Full length blots belonging to Figure 2D.** Top left corner: figure as presented in paper. Cell lysates were applied to three individual gels. One gel was used to blot p-P70S6 and p-S6 simultaneously. p-PAK2 and Rheb were blotted on the other two gels. The p-PAK blot was reprobbed for actin to confirm equal protein concentration in the lysates. The other blots were also reprobbed for actin, with identical results (not shown). All the blots were performed under the same conditions and the data was analysed in the same way for all the antibodies used. Croplines are indicated in the full length blots.



2E

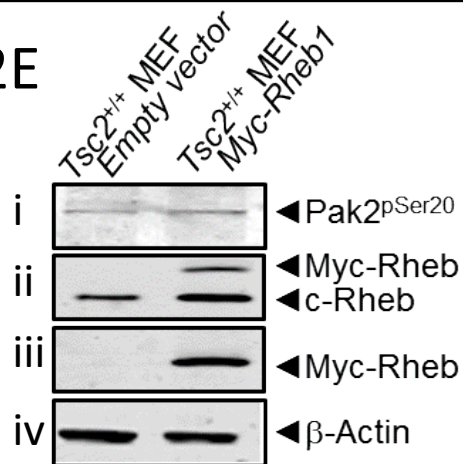

1 2 3 4 5

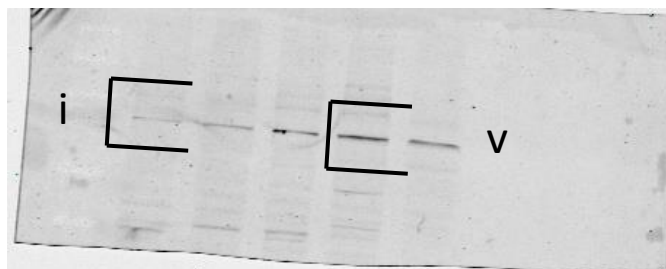

← p-PAK2

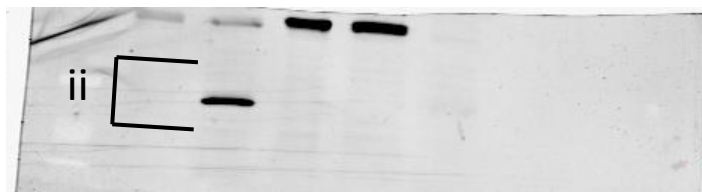

← Myc-Rheb

2F

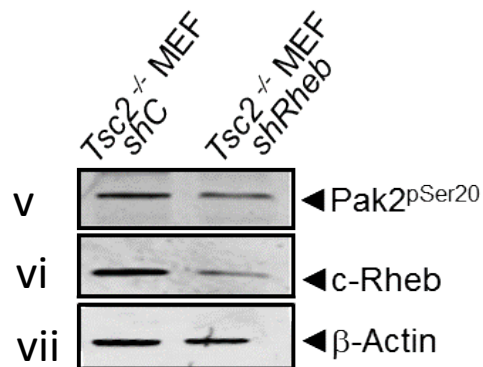

1 2 3 4 5

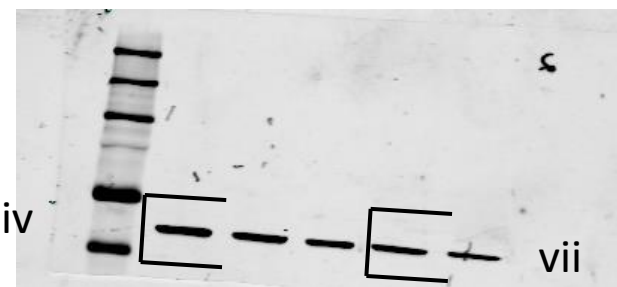

← Actin

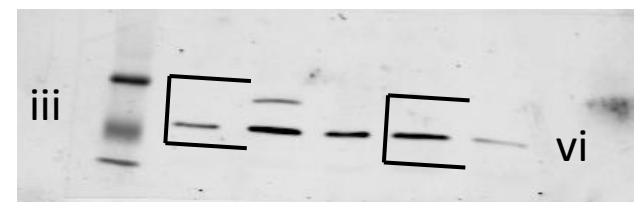

← Rheb

- 1) *Tsc2*<sup>+/+</sup>
- 2) *Tsc2*<sup>+/+</sup> + *Myc-Rheb1*
- 3) *Tsc2*<sup>-/-</sup>
- 4) *Tsc2*<sup>-/-</sup> + shC
- 5) *Tsc2*<sup>-/-</sup> + *shRheb*

**Supplementary Figure S3 E: Full length blots belonging to Figures 2 E and F.** Top left corner: figure as presented in paper. Cell lysates were applied to one gel. The blot was cut below the 50kDa band of the marker and the upper part was blotted with p-PAK2, and reprobed for actin, and the lower part was blotted with Myc and reprobed for Rheb. All the blots were performed under the same conditions and the data was analysed in the same way for all the antibodies used. Lane 3 is not used for Figure 2 E and F. Croplines are indicated in the full length blots.

3 A

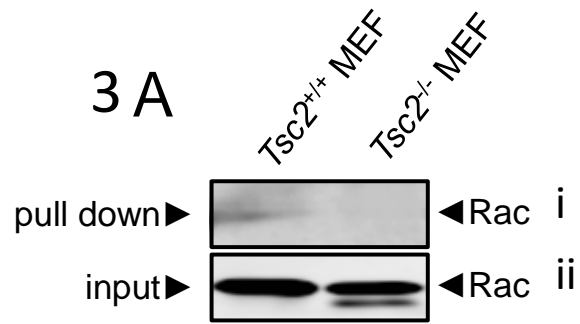

1 2 3 4 5 6 7 8 9 10 11 12

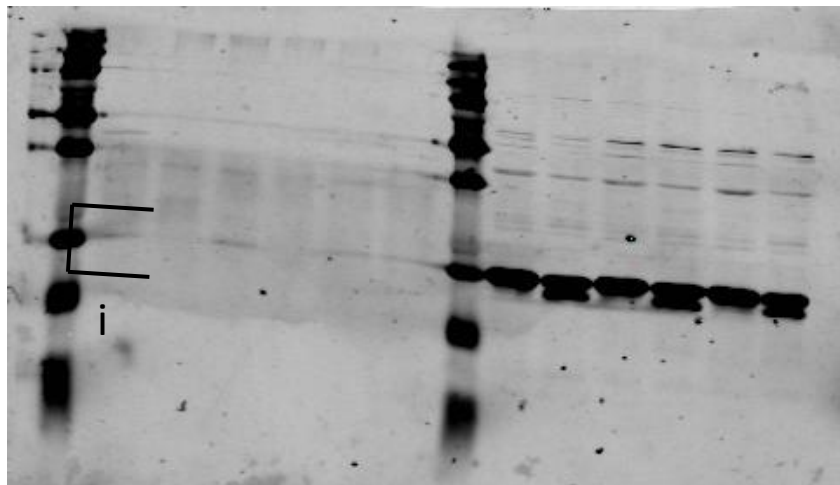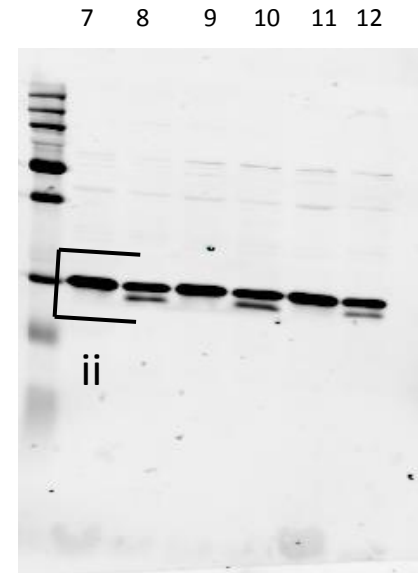

← RAC →

1) *TSC2*<sup>+/+</sup> PD; 2) *TSC2*<sup>-/-</sup> PD; 3) *TSC2*<sup>+/+</sup> PD; 4) *TSC2*<sup>-/-</sup> PD; 5) *TSC2*<sup>+/+</sup> PD; 6) *RHEB*<sup>-/-</sup> (PD); 7) *TSC2*<sup>+/+</sup> (I); 8) *TSC2*<sup>-/-</sup> (I); 9) *TSC2*<sup>+/+</sup> (I); 10) *TSC2*<sup>-/-</sup> (I); 11) *TSC2*<sup>+/+</sup> (I); 12) *RHEB*<sup>-/-</sup> (I)

**Supplementary Figure S4A: Full length blots belonging to Figures 3A.** Top left corner: figure as presented in paper. Pull down and input samples were run on the same gel, which was subsequently blotted for Rac. The blot on the right is a lower exposure of the blot on the left. The lower exposure is used in the manuscript. Lanes 1, 2, 7 and 8 were used in the manuscript. Croplines are indicated in the full length blots.

3 B

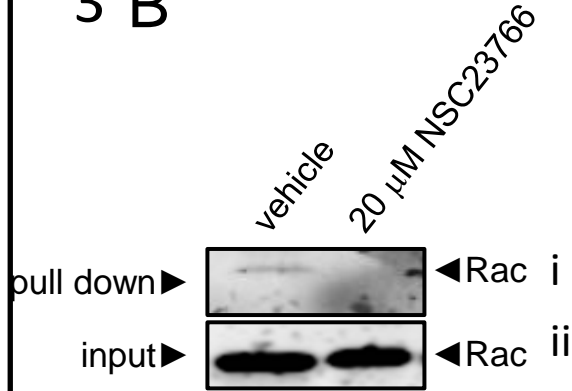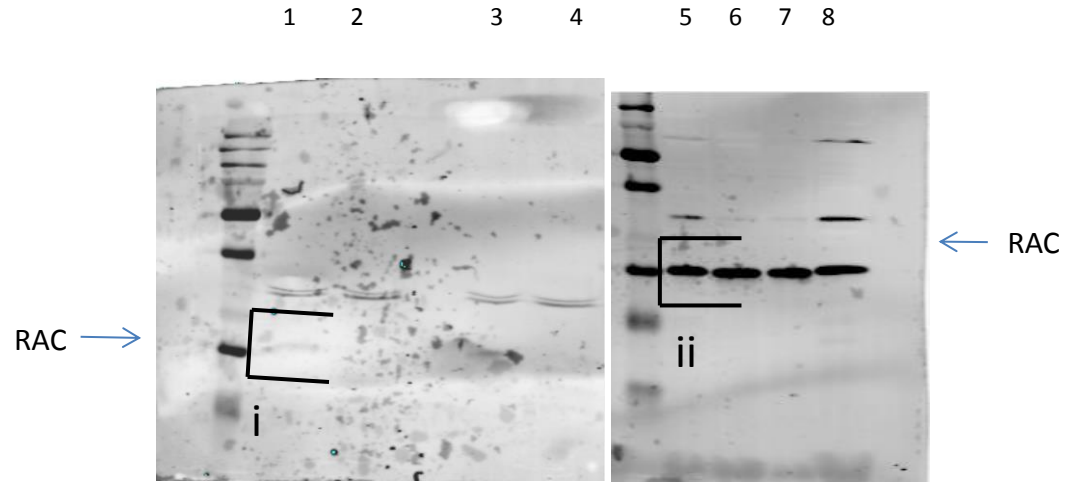

1) TSC2+/+ PD; 2) TSC2+/+ + NSC23766 (PD); 3) TSC2+/+ PD; 4) TSC2+/+ + NSC23766 (PD); 5) TSC2+/+ (I); 6) TSC2+/+ + NSC23766 (I); 7) TSC2+/+ (I); 8) TSC2+/+ + NSC23766 (I)

**Supplementary Figure S4B: Full length blots belonging to Figures 3B.** Top left corner: figure as presented in paper. Pull down and input samples were run on separate gels, which were subsequently blotted for Rac. The same incubation times and conditions were used for both blots. Lanes 1,2, 5 and 6 were used in the manuscript.

3 C

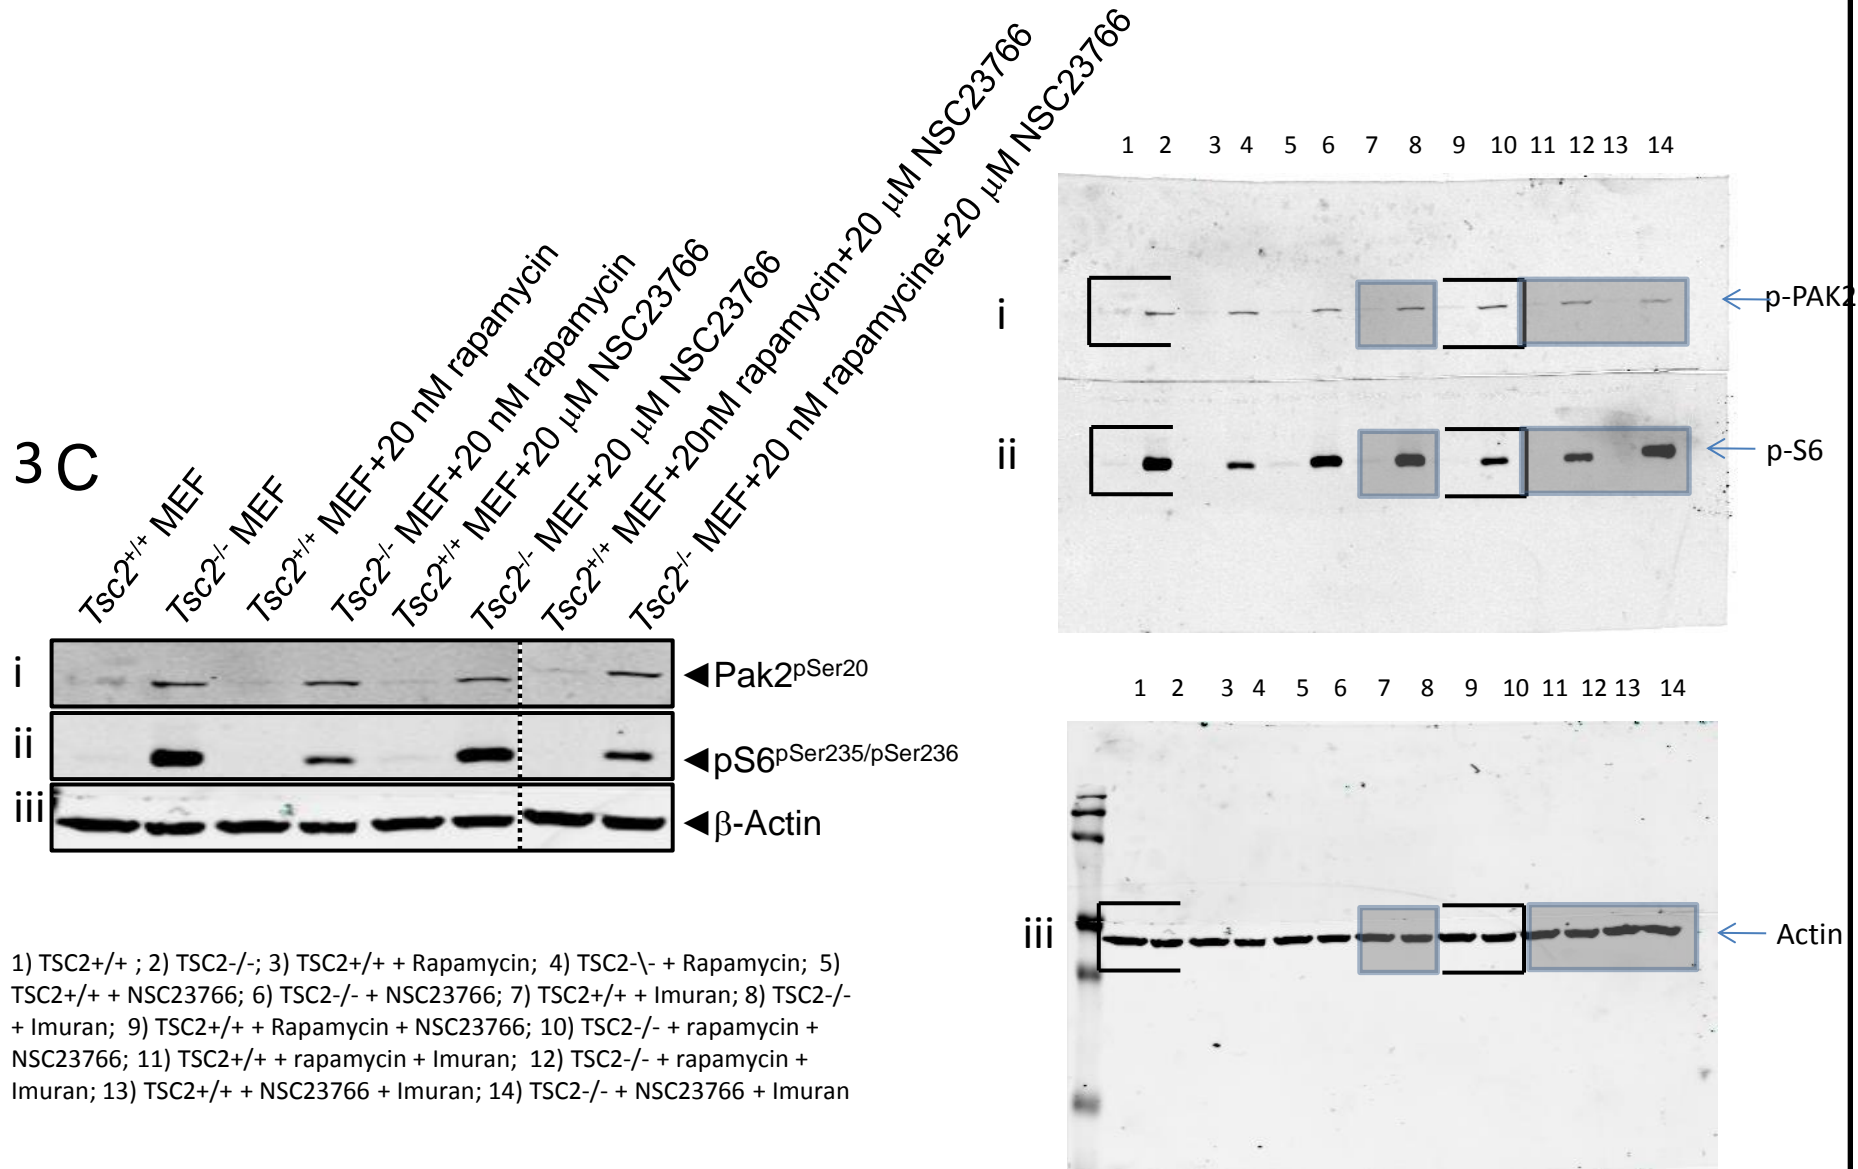

**Supplementary Figure S4C: Full length blots belonging to Figures 3C.** Left: figure as presented in paper. p-PAK2, actin and p-S6 were blotted on the same gel. The gel was cut below the 50kDa band of the marker and the upper part was blotted with p-PAK2, and the lower part was blotted with actin and p-S6. As p-S6 and actin antibodies were from different sources, we blotted them together and developed using two differently labelled secondary antibodies. In the manuscript lines 7, 8, 11, 12, 13, and 14 were not shown (indicated by dotted line and grey bars in full length blots.)

| Peptide # | MOTIF        | PROTEIN                                                        | UP_KIN                                          | PSITE | Wild type MEF            |                        |              | TSC2-/- MEF              |                        |              |
|-----------|--------------|----------------------------------------------------------------|-------------------------------------------------|-------|--------------------------|------------------------|--------------|--------------------------|------------------------|--------------|
|           |              |                                                                |                                                 |       | $\Sigma(x1,x2,...,xn)/n$ | $\alpha(x1,x2,...,xn)$ | Markov score | $\Sigma(x1,x2,...,xn)/n$ | $\alpha(x1,x2,...,xn)$ | Markov score |
| 1         | ELDQGSCLTSF  | IKK beta                                                       | IKKs NAK / NIK;MAP3K7;MEKK1;_IKK_alpha          | S177  | 6,365                    | 2,395                  | 2            | 7,02                     | 0,13                   | 2            |
| 2         | VDLACTPTDVR  | Cyclin D1                                                      | GSK3beta                                        | T286  | 2,726666667              | 1,930964065            | 3            |                          |                        | 0            |
| 3         | TTNEEYLDLSQ  | Fibroblast growth factor receptor 2                            | FGFR2 (to PLCg)                                 | Y770  | 4,92                     |                        | 1            | 6,295                    | 0,995                  | 2            |
| 4         | SSLDVYDGRFL  | Acetylcholinesterase                                           | PKA(?) / nd                                     | S164  | 5,595                    | 1,323905208            | 4            |                          |                        | 0            |
| 5         | ALVHSYMTGRR  | SH2D3A                                                         | nd                                              | Y95   | 8,436666667              | 0,217536715            | 6            |                          |                        |              |
| 6         | NegCtrl      | Mixed peptides without STY                                     | na                                              |       |                          |                        |              | 8,628                    | 0,48217839             | 5            |
| 7         | SptCtrl      | Used for production/QC                                         | na                                              |       | 8,423333333              | 0,474856704            | 6            | 8,643333333              | 0,480370228            | 6            |
| 8         | PosCtrl      | Mixed kinase substrate peptides                                | na                                              |       | 6,56                     | 0,13                   | 2            | 6,51                     |                        | 1            |
| 9         | FDDPSYVNVQN  | Shc                                                            | TRK-T3;Insulin_receptor;MAP_kinase;Fyn;Lck      | Y427  | 7,84                     | 0,937656654            | 3            | 7,55                     | 0,063770422            | 3            |
| 10        | HHIDYYKTTN   | FGF receptor 1                                                 | FGFR1 (imp for catalytic activity)              | Y654  | 8,715                    | 0,598240476            | 6            | 8,778333333              | 0,436593505            | 6            |
| 11        | TATEGQYQQQP  | Lyn                                                            | Csk_homologous_kinase                           | Y508  | 2,135                    | 2,135                  | 2            |                          |                        | 0            |
| 12        | QGVRTYVDPFT  | EphA4                                                          | EphA4                                           | Y596  | 5,946666667              | 0,910433352            | 3            |                          |                        | 0            |
| 13        | KTRDQYLMWLT  | Phosphatidylinositol 3 kinase, regulatory subunit, alpha       | Insulin_receptor                                | Y580  | 2,403333333              | 3,398826595            | 3            | 3,746666667              | 2,878950426            | 3            |
| 14        | FMCKVYSDPQP  | FGF receptor 1                                                 | lgt extracellulair FGFR1                        | Y280  | 5,695                    | 0,005                  | 2            | 5,15                     |                        | 1            |
| 15        | TSSVLYTAVQP  | PDGF receptor, beta                                            | PDGFRbeta to PLCg                               | Y1009 | 2,95                     | 2,95                   | 2            | 1,663333333              | 2,352308559            | 3            |
| 16        | NADDSYEPFV   | B-cell linker protein                                          | SYK / SLP-76                                    | Y96   |                          |                        | 0            | 4,305                    | 2,509287748            | 4            |
| 17        | KERRTESINS   | HAND1                                                          | PKA;PKCalpha                                    | T107  | 4,796666667              | 3,707940429            | 3            |                          |                        | 0            |
| 18        | ALRISTPLTGV  | Retinoblastoma like 2                                          | CDK4                                            | T401  | 5,8                      | 0,75                   | 2            |                          |                        | 0            |
| 19        | NSRPGTPSAEG  | Transcription factor IIF, alpha subunit                        | cdk9 / TFIIIFalpha_subunit                      | T389  |                          |                        | 0            |                          |                        | 0            |
| 20        | ENTLPTPMVLQ  | Mnk2                                                           | ERK ? / nd                                      | T379  |                          |                        | 0            | 5,966666667              | 0,897935905            | 3            |
| 21        | EPVQLTPDDED  | Protein kinase C, zeta                                         | PKCzeta                                         | T560  | 6,973333333              | 0,695908679            | 3            | 3,68                     | 3,68                   | 2            |
| 22        | GSGTATPSALI  | Transcription factor Sp1                                       | ERK1                                            | T736  |                          |                        | 0            | 6,53                     |                        | 1            |
| 23        | ISEGTTLKDLI  | TGF beta receptor, type I                                      | TGF_beta_receptor,_type_II                      | T176  | 7,106                    | 0,142632395            | 5            | 7,782                    | 0,221756623            | 5            |
| 24        | GSAAPYLKTKF  | STAT3                                                          | JAK1;c-Src                                      | Y705  | 7,708333333              | 0,355453544            | 6            | 7,5425                   | 0,322286751            | 4            |
| 25        | NYQVPSPPGSH  | T-Cell acute lymphoblastic leukemia 2                          | Erk / nd                                        | S100  | 3,62                     |                        | 1            | 7,0325                   | 0,154171171            | 4            |
| 26        | AFEEGSQSTTI  | ATM                                                            | auto                                            | S1981 | 6,32                     |                        | 1            | 8,056666667              | 0,453161732            | 3            |
| 27        | NGLPGSRPGSP  | HIV 1 Tat interacting protein                                  | Cyclin_B1;CDC2                                  | S119  |                          |                        | 0            | 4,74                     |                        | 1            |
| 28        | EERKASGPPKG  | CRIP2                                                          | cGMP_kinase_I                                   | S104  | 5,34                     | 0,28                   | 2            |                          |                        | 0            |
| 29        | KRQYGTISHGI  | Amyloid precursor like protein 2                               | PKC                                             | T723  | 8,881666667              | 0,387359293            | 6            | 8,812                    | 0,382015706            | 5            |
| 30        | LIEPDTGRVP   | Plectin 1                                                      | CDC2                                            | T4536 | 6,51                     |                        | 1            | 3,365                    | 3,365                  | 2            |
| 31        | CGSQKYAYFNG  | Connexin 43                                                    | c-Src                                           | Y265  | 7,376666667              | 0,263986532            | 3            | 7,314                    | 0,486275642            | 5            |
| 32        | GVTTTTFCGTP  | Protein kinase C epsilon                                       | autophos / nd                                   | T566  | 4,51                     | 0,54                   | 2            | 4,1075                   | 2,011471787            | 4            |
| 33        | AFRAPSIHGGS  | Keratin 19                                                     | p38 MAPK / nd                                   | S35   | 7,53                     | 1,57                   | 2            |                          |                        | 0            |
| 34        | MDSSIISKALS  | Syntaxin 1A                                                    | DAP kinase (linked to autophagia) / Syntaxin_1A | S188  | 6,14                     | 0,43                   | 2            | 7,0275                   | 0,499818717            | 4            |
| 35        | SRRPKSSLPPV  | Myosin light chain kinase                                      | PAK2                                            | S1208 | 6,5675                   | 0,848391861            | 4            | 6,925                    | 0,990416579            | 4            |
| 36        | RSRSRSPRPRG  | ErbB3                                                          | Phospholipid_kinase_Phosphoinositide_kinase     | S1123 | 7,84                     | 0,43099884             | 5            | 8,225                    | 0,253229145            | 4            |
| 37        | VMVTASHNPEE  | Phosphoglucomutase 3                                           | PAK1 / nd                                       | S64   | 5,995                    | 0,305                  | 2            | 7,7                      | 0,91                   | 2            |
| 38        | PGADLSQYKMD  | CtIP                                                           | ATM                                             | S664  | 6,335                    | 1,115                  | 2            | 5,925                    | 1,185                  | 2            |
| 39        | GLYSRSGSLSG  | PKN                                                            | PKN                                             | S374  | 7,2075                   | 0,20716841             | 4            | 4,773333333              | 3,526190894            | 3            |
| 40        | ARPPASPPSPQR | Synapsin I                                                     | CDK5                                            | S551  | 6,495                    | 0,537842914            | 4            | 7,43                     | 0,513225097            | 3            |
| 41        | EILGDSQHADV  | Fanconi anemia, complementation group D2                       | ATM / nd                                        | S222  | 7,855                    | 1,125                  | 2            | 5,7675                   | 1,225446347            | 4            |
| 42        | VLAQPSTSRKR  | CHK2                                                           | ATM / PKA;PKG                                   | S19   | 9,051666667              | 0,132842848            | 6            | 9,303333333              | 0,270903837            | 6            |
| 43        | ISRQHSYDNIV  | Glutamate receptor ionotropic, N-methyl D-aspartate subunit 2A | CaMKII                                          | S1291 | 7,89                     | 0,248274042            | 5            | 8,078333333              | 0,506833854            | 6            |
| 44        | QARANSFVGTA  | 3-Phosphoinositide dependent protein kinase 1                  | PDK1                                            | S241  | 3,965                    | 2,49259403             | 4            | 6,256                    | 1,102734782            | 5            |
| 45        | RIRTQSFSLQE  | Nitric oxide synthase 3                                        | PKG / AKT1                                      | S1176 | 6,4575                   | 0,717229914            | 4            | 7,6325                   | 0,187533333            | 4            |
| 46        | AVHEDSGDEDG  | Histone deacetylase 2                                          | CK2                                             | S394  | 6,18                     | 0,193045763            | 3            | 6,83                     |                        | 1            |
| 47        | KEEPPSPQPSP  | Heat-shock transcription factor 1                              | GSK3                                            | S303  | 4,985                    | 1,15140132             | 4            | 6,253333333              | 0,883037686            | 3            |
| 48        | QTPPVSPAPQP  | Cortactin                                                      | ERK, EphB2                                      | S405  | 3,2                      |                        | 1            |                          |                        | 0            |
| 49        | YVSILSPKEVS  | Regulator of G protein signaling 19                            | ERK2                                            | S151  | 7,886                    | 0,639205757            | 5            | 8,428333333              | 0,413135033            | 6            |
| 50        | LDRFLSLEPVK  | Cyclin D1                                                      | associated with cyclin D degradation / PKA      | S90   | 8,506666667              | 0,26898988             | 6            | 9,038333333              | 0,173341346            | 6            |

|     |             |                                                 |                                             |          |             |             |   |             |             |   |
|-----|-------------|-------------------------------------------------|---------------------------------------------|----------|-------------|-------------|---|-------------|-------------|---|
| 51  | KPKDASQRRRS | c-Src                                           | PKC                                         | S12      | 8,675       | 0,132003788 | 6 | 8,686666667 | 0,452130758 | 6 |
| 52  | GIWKASFTTFT | Caveolin 1                                      | c-Src                                       | Y14      | 8,051666667 | 0,473301055 | 6 | 8,1         | 0,351738539 | 5 |
| 53  | KALPLSPRKRL | CDC6                                            | CDK2                                        | S54      | 9,121666667 | 0,221842036 | 6 | 8,984       | 0,257340242 | 5 |
| 54  | YSQGASPPQHQ | Cut like 1                                      | CDC2                                        | S1237    | 5,6525      | 0,465315753 | 4 | 6,905       | 0,518531581 | 4 |
| 55  | LQRQASPSIVI | Ras associated protein Rab5B                    | CDC2                                        | S123     | 5,89        | 1,033956801 | 3 | 8,463333333 | 1,274528235 | 3 |
| 56  | NSNVFSMFEQT | Myosin light chain 2, regulatory, cardiac, slow | MLCK                                        | S19      | 7,266666667 | 0,528919233 | 6 | 8,0225      | 0,621143099 | 4 |
| 57  | AGPALSPVPPV | Bcl 2                                           | JNK1;TNF-alpha                              | S87      | 4,49        | 4,49        | 2 | 6,62        |             | 1 |
| 58  | EPQRRSARLSA | HMG17                                           | Ribosomal_protein_S6_kinase_alpha_3;PKA;PKC | S25      | 8,791666667 | 0,215825289 | 6 | 8,926666667 | 0,2171533   | 6 |
| 59  | IRESESTAGSF | Lck                                             | PKC                                         | S158     | 7,32        | 0,312089731 | 5 | 7,816666667 | 0,368766713 | 6 |
| 60  | RTAKDSDDDDD | Syntaxin 1A                                     | CK2                                         | S14      | 7,125       | 0,413793427 | 4 | 7,584       | 0,186611897 | 5 |
| 61  | RDSPLSSRLLD | HSP22                                           | PKC                                         | S14      | 7,7275      | 0,437171305 | 4 | 8,3025      | 0,517801844 | 4 |
| 62  | YQRRASDDGKL | RAF1                                            | PKA (neg. to Raf)                           | S43      | 6,674       | 0,249687805 | 5 | 7,765       | 0,470983015 | 4 |
| 63  | SRKGYSRKGF  | Peptidylglycine alpha amidating monooxygenase   | PKC                                         | S930     | 9,42        | 0,253771551 | 6 | 9,208       | 0,185191792 | 5 |
| 64  | GFTEESGDDEY | TCFL1                                           | CK2                                         | S41      | 9,796666667 | 0,447052073 | 6 | 9,671666667 | 0,301519301 | 6 |
| 65  | GLAEFYHPGQE | CK2, alpha 1                                    | CDC2                                        | S370     | 3,48        |             | 1 | 5,885       | 0,375       | 2 |
| 66  | PSPKSYENLWF | Colony-stimulating factor 3 receptor            | c-fms to shc / Hck                          | Y814     | 4,68        |             | 1 | 6,63        | 0,12        | 2 |
| 67  | VGTARYMAPEV | TGF beta receptor, type II                      | TGF_beta_receptor_II                        | Y424     | 5,17        |             | 1 | 3,08        | 2,37492456  | 3 |
| 68  | AEKPFYVNEF  | BCR                                             | Lyn, Abl BCR                                | Y177     | 6,235       | 0,275       | 2 | 6,05        | 0,85390866  | 5 |
| 69  | FKTEGPDSD   | p53                                             | CDK7 / CK2alpha_1;p38_MAP_kinase;PKR;CDK2   | S392     | 0           |             | 1 | 6           |             | 1 |
| 70  | NegCtrl     | Mixed peptides without STY                      | na                                          |          |             |             |   |             |             |   |
| 71  | SptCtrl     | Used for production/QC                          | na                                          |          | 8,2425      | 0,32911814  | 4 | 7,61        | 0,504380809 | 5 |
| 72  | PosCtrl     | Mixed kinase substrate peptides                 | na                                          |          | 5,913333333 | 0,505459087 | 3 |             |             | 0 |
| 73  | TAECPSVLELG | Crystallin beta A4                              | nd                                          | S35      | 5,68        | 0,29        | 2 | 6,975       | 0,211719154 | 4 |
| 74  | VLDDEYVSSFG | Protein tyrosine kinase TXK                     | Lyn, Fyn                                    | Y420     | 7,7225      | 0,667134732 | 4 | 7,7325      | 0,478193214 | 4 |
| 75  | TLVIAYLMMRQ | Dual specificity phosphatase 3                  | ZAP70_                                      | Y138     | 3,085       | 3,085       | 2 | 6,3425      | 0,24190649  | 4 |
| 76  | TIPPKYRELLA | Calpastatin                                     | c-Src                                       | Y205     | 5,223333333 | 0,928702799 | 3 | 6           | 0,19        | 2 |
| 77  | FDAHIYGRVI  | Protein kinase C delta                          | c-Src / PDGF;Lyn_kinase                     | Y64      | 6,19        |             | 1 | 6,638       | 0,517470772 | 5 |
| 78  | AEDSTYDEYEN | Cortactin                                       | c-Src                                       | Y486     | 6,6575      | 0,571505687 | 4 | 6,77        | 0,42        | 2 |
| 79  | PGLRTYVDPHT | EphA3                                           | EphA3                                       | Y596     | 6,43        | 0,47        | 2 |             |             | 0 |
| 80  | CSLGQYTSIGG | GABA transporter                                | nd                                          | Y107     | 5,822       | 0,267761088 | 5 | 5,85        | 0,14        | 2 |
| 81  | VDPMLTPEERH | Amyloid precursor like protein 2                | JNK / CDC2-kinase                           | T736     | 6,88        |             | 1 |             |             | 0 |
| 82  | SSYRRTFGGAP | Desmin                                          | Rho_Kinase                                  | T17      | 7,645       | 0,515       | 2 | 6,6825      | 0,53072474  | 4 |
| 83  | IEQFSTVKGVE | G protein coupled receptor kinase 6             | G_protein_coupled_receptor_kinase_6         | T485     | 6,32        | 0,45        | 2 | 5,86        | 0,313793988 | 3 |
| 84  | FNNPAYVLEGG | Inositol polyphosphate phosphatase like 1       | Lyn kinase / c-Src                          | Y986     | 7,253333333 | 0,614563983 | 6 | 7,45        | 0,331119314 | 5 |
| 85  | VTKLLTDVQLM | Heat-shock transcription factor 1               | CK2                                         | T142     | 3,67        | 0,04        | 2 | 5,22        |             | 1 |
| 86  | TATNSTLPSAE | Formyl peptide receptor 1                       | Beta-adrenergic_receptor_kinase1            | T339     | 3,75        |             | 1 |             |             | 0 |
| 87  | NPCTETFTGTL | ASK1                                            | ASK1                                        | T+T77883 | 4,145       | 1,275       | 2 | 2,63        | 2,63        | 2 |
| 88  | PGAGHYEDTIL | ALK                                             | ALK                                         | S1604    | 6,855       | 0,416563321 | 4 | 7,7225      | 0,379300343 | 4 |
| 89  | CLSPASSGSSA | NFAT1                                           | GSK3 ? / nd                                 | S171     | 4,98        | 0,56        | 2 | 0           |             | 1 |
| 90  | NQKYMSFTSGD | PAK3                                            | PAK3                                        | S139     | 5,893333333 | 0,637930682 | 3 | 7,71        | 0,31        | 2 |
| 91  | PSPPSPSQQI  | Serum/glucocorticoid regulated kinase           | ERK5                                        | S78      | 0           | 0           | 2 | 0           | 0           | 2 |
| 92  | PGKAESVASLT | Period circadian protein 2                      | CK1epsilon                                  | S662     | 6,335       | 0,645       | 2 | 3,85        |             | 1 |
| 93  | FLSSPTYRALL | Regulator of G protein signaling 19             | PKC                                         | T201     | 7,71        | 0,294278779 | 3 | 6,645       | 0,745       | 2 |
| 94  | RLRQGTLRRLD | Epithelial calcium channel 2                    | PKCalpha                                    | T702     | 7,596       | 0,652766421 | 5 | 7,05        | 0,345543051 | 3 |
| 95  | REWHKTTQMSA | MAP3K11                                         | MAP3K11 MLK3                                | T277     | 6,31        |             | 1 | 6,705       | 0,605       | 2 |
| 96  | AAEKEYHAEGG | EGF receptor                                    | c-Src                                       | Y869     | 6,6         | 0,42        | 2 | 5,985       | 0,752778188 | 4 |
| 97  | LQRSSSFKDF  | SH3 protein expressed in lymphocytes            | nd                                          | S27      | 7,3575      | 0,536534016 | 4 | 8,176666667 | 0,504667107 | 6 |
| 98  | SDEVQSPVVRV | PCTAIRE protein kinase 1                        | CDK_5                                       | S95      | 2,705       | 2,705       | 2 |             |             | 0 |
| 99  | PFRRPSTYGIP | TFII-I                                          | PRKG1                                       | S412     | 8,302       | 0,508936145 | 5 | 8,3225      | 0,269849495 | 4 |
| 100 | FMRRTSLGTEQ | EP4 receptor                                    | PKA                                         | S222     | 5,03        | 1,18        | 2 | 5,245       | 0,845       | 2 |
| 101 | PGGDRSPSRML | Runt related transcription factor 2             | Erk(?) / nd                                 | S451     | 4,2         | 0,24        | 2 | 5,93        |             | 1 |
| 102 | PQSDPSVEPPL | p53                                             | CK1alpha_1                                  | S9       | 4,695       | 0,945       | 2 | 2,87        | 2,227599605 | 3 |

|     |              |                                                        |                                                      |        |             |             |   |             |             |   |
|-----|--------------|--------------------------------------------------------|------------------------------------------------------|--------|-------------|-------------|---|-------------|-------------|---|
| 103 | GSPIRCSVSV   | SMAD3                                                  | MAP3K7 / TAK1                                        | S422   | 2,37        | 3,351686143 | 3 |             |             | 0 |
| 104 | MRKKISNAQLQ  | Cullin 5                                               | PKA                                                  | S730   | 5,8         |             | 1 |             |             | 0 |
| 105 | RLRTHSIESSG  | MAP2K4                                                 | AKT1                                                 | S80    | 5,9         |             | 1 | 4,38        |             | 1 |
| 106 | PSPQPSPRVEE  | Heat-shock transcription factor 1                      | MAPK                                                 | S307   | 2,58        | 2,58        | 2 | 2,525       | 2,525       | 2 |
| 107 | MIHNRSKINLQ  | HMG CoA reductase                                      | PKA                                                  | S872   | 8,13        | 0,370243163 | 5 | 7,87        | 0,234008547 | 5 |
| 108 | AIRRASTIEMP  | Phospholamban                                          | PKA                                                  | S16    | 5,91        | 1,245993579 | 4 | 6,356666667 | 0,664596787 | 3 |
| 109 | RRRAVSMDNSN  | Forkhead box protein O3A                               | AKT1                                                 | S253   | 5,47        |             | 1 | 2,42        | 2,42        | 2 |
| 110 | VPSYDSFDS    | C ets 1 protein                                        | CaMK2                                                | S285   | 7,898       | 0,448972159 | 5 | 7,748       | 0,40076926  | 5 |
| 111 | RSRHSSYPAGT  | BCL2 antagonist of cell death                          | AKT                                                  | S75    | 7,645       | 0,693006734 | 6 | 7,588333333 | 0,498979514 | 6 |
| 112 | GFTRKSVRKAQ  | Protein phosphatase 2, regulatory subunit B56, alpha   | PKR                                                  | S28    | 8,278333333 | 0,228940798 | 6 | 8,088       | 0,233443783 | 5 |
| 113 | HAVRESQVELR  | SNARE associated protein                               | PKA                                                  | S50    | 3,44        | 2,445581049 | 3 | 6,026666667 | 0,118977122 | 3 |
| 114 | LRRRLSDSNFM  | Synapsin I                                             | CaMKI;PKA                                            | S9     | 6,16        |             | 1 | 7,27        | 0,675327081 | 3 |
| 115 | LLRSGSSPNLN  | E1A binding protein p300                               | PKCdelta                                             | S89    | 7,97        | 0,514703798 | 5 | 7,922       | 0,731447879 | 5 |
| 116 | SEEPDSRGGSP  | eIF-2B epsilon                                         | GSK3                                                 | S540   | 3,69        | 1,175273018 | 3 | 5,89        |             | 1 |
| 117 | RRRAASMDSSS  | AFX 1                                                  | AKT1                                                 | S196   | 6,72        | 0,797684148 | 4 | 6,51        | 0,01        | 2 |
| 118 | DAPPLSPYPFV  | Retinoblastoma like 2                                  | CDK4                                                 | S1035  | 8,92        | 0,318538328 | 6 | 9,566666667 | 0,139004396 | 6 |
| 119 | LPGALSPLYGV  | Paxillin                                               | JNK1                                                 | S178   | 6,815       | 1,007980655 | 6 | 7,201666667 | 0,565815537 | 6 |
| 120 | SSTPVSPPLHHA | ETS variant gene 1                                     | ERK / ERBB2                                          | S146   | 6,172       | 0,843336232 | 5 | 7,495       | 0,446682214 | 4 |
| 121 | PSRKGSFGGHR  | Connexin 32                                            | PKC                                                  | S229   | 8,261666667 | 0,278473019 | 6 | 7,886666667 | 0,428978114 | 6 |
| 122 | RLRRDSKEANA  | RAS related associated with diabetes                   | PKA, PKC,CKII                                        | S257   | 2,16        | 2,211345744 | 4 | 4,07        | 3,267486292 | 3 |
| 123 | EVFDFSQRKE   | NFE2L2                                                 | PKC / nd                                             | S40    | 7,482       | 0,635496656 | 5 | 7,36        | 1,032724552 | 5 |
| 124 | EDGTGSPQLNN  | Beta arrestin 1                                        | GRK2/BARK / ERK1;ERK2                                | S412   | 6,22        |             | 1 | 4,75        |             | 1 |
| 125 | VSPRHSEATA   | Heterogeneous nuclear ribonucleoprotein D              | PKA                                                  | S87    | 6,04        | 0,99        | 2 | 3,506666667 | 2,481213861 | 3 |
| 126 | VKRRPSPYEME  | T cell acute lymphocytic leukemia 1                    | erk1 / T_cell_acute_lymphocytic_leukemia_1           | S172   | 7,333333333 | 0,357055862 | 3 | 6,931666667 | 0,653692503 | 6 |
| 127 | KFRTPSFLKKN  | Adducin 3                                              | PKCalpha                                             | S693   | 7,614       | 0,229486383 | 5 | 7,706       | 0,301370204 | 5 |
| 128 | STPAPSRTASF  | ATP citrate lyase                                      | GSK3                                                 | S450   | 8,485       | 0,276691766 | 6 | 7,298333333 | 0,893633345 | 6 |
| 129 | EGDEIYEDLMR  | VAV1                                                   | Lck                                                  | Y174   | 8,22        | 0,513906606 | 6 | 8,403333333 | 0,629620697 | 6 |
| 130 | IESDIYAEIPD  | Focal adhesion kinase 2                                | FAK2                                                 | Y402   | 4,8825      | 2,904775163 | 4 | 6,635       | 0,505       | 4 |
| 131 | ILDREYYSVQQ  | Ron                                                    | Ron&c-Met (imp for catalytic act.)                   | Y1238  | 6,215       | 0,215       | 2 | 0           |             | 1 |
| 132 | TAPEYYAPEVH  | Titin                                                  | nd                                                   | Y24917 | 5,57        | 0,33436507  | 3 | 6,58        | 0,08        | 2 |
| 133 | CSSLSSQSDIL  | BRCA1                                                  | ATM                                                  | S1387  | 1,933333333 | 2,734146221 | 3 | 3,5725      | 2,072310003 | 4 |
| 134 | NegCtrl      | Mixed peptides without STY                             | na                                                   |        |             |             |   |             |             |   |
| 135 | SptCtrl      | Used for production/QC                                 | na                                                   |        | 8,478333333 | 0,480049187 | 6 | 8,315       | 0,636468119 | 6 |
| 136 | PosCtrl      | Mixed kinase substrate peptides                        | na                                                   |        | 5,228333333 | 2,256999606 | 6 | 3,72        | 2,771726297 | 3 |
| 137 | IGEGTYGTVFK  | Cyclin dependent kinase 5                              | ABL                                                  | Y15    | 6,965       | 0,467894219 | 4 | 7,186       | 0,632664208 | 5 |
| 138 | FEFYSYVNPQF  | Protein kinase C alpha                                 | SYK                                                  | Y658   | 6,78        | 0,407615014 | 4 | 7,82        | 0,67        | 2 |
| 139 | TSLAQYDSNSK  | Bone marrow kinase BMX                                 | BTK;ITK;Tec                                          | Y216   | 4,58        | 0,06        | 2 | 6,38        |             | 1 |
| 140 | SANAIYSLAAR  | CBL                                                    | tyrosine kinases EGFR                                | Y774   | 0           |             | 1 | 5,31        |             | 1 |
| 141 | LTIDRYLAIVH  | CCR2                                                   | JAK2                                                 | Y139   | 7,855       | 0,246018292 | 4 | 7,555       | 0,405801676 | 4 |
| 142 | PSEEGYQDYEP  | Synuclein alpha                                        | SYK                                                  | Y136   | 6,79        | 0,446631839 | 5 | 7,462       | 0,70799435  | 5 |
| 143 | MEDYDYVHLQG  | p130CAS                                                | phosph as consequence of rac activation (src?) / FAK | Y666   | 4,455       | 2,596155812 | 4 | 5,01        | 0,949368211 | 4 |
| 144 | IDAFSDYANFK  | Protein tyrosine phosphatase, receptor type, alpha     | Src, Fyn, Yes / nd                                   | Y798   | 6,876       | 0,547415747 | 5 | 6,4625      | 0,516109242 | 4 |
| 145 | PVVTCTPSCTA  | c-Fos                                                  | MAPK                                                 | S374   | 2,67        |             | 1 | 5,09        |             | 1 |
| 146 | RSRRLTFRKNI  | Endothelial differentiation gene 1                     | AKT                                                  | T236   | 6,27        |             | 1 |             |             | 0 |
| 147 | ENPNFTGKKME  | Crystallin, beta B2                                    | nd                                                   | T118   | 6,635       | 0,455       | 2 | 5,48        | 1,90579817  | 3 |
| 148 | LGSQSYEDMRG  | CD19                                                   | Lyn_kinase;Bruton's_tyrosine_kinase                  | Y531   | 5,696666667 | 0,989421829 | 3 | 5,855       | 0,583159498 | 4 |
| 149 | SSSPSTPVGSP  | Transcription factor 3                                 | MAPK                                                 | T355   | 2,4375      | 2,823387814 | 4 | 0           | 0           | 2 |
| 150 | TLQTRTQEGSL  | DNA-dependent protein kinase catalytic subunit         | DNA-dependent_protein_kinase_catalytic_subunit       | T2620  | 3,426666667 | 2,57295334  | 3 | 5,235       | 1,025       | 2 |
| 151 | MSTESMIRD    | TNF alpha                                              | Casein_Kinase                                        | S2     | 5,963333333 | 0,322937903 | 3 | 5,64        | 0,360832371 | 3 |
| 152 | ERGQEYLILEK  | Tec tyrosine kinase                                    | Tec_tyrosine_kinase                                  | Y206   | 7,26        | 0,547768199 | 4 | 7,36        | 0,4         | 2 |
| 153 | GYLVDSVAKTI  | MAP2K6                                                 | MLK3 / nd                                            | S207   | 7,4675      | 0,546917498 | 4 | 7,268       | 0,433976958 | 5 |
| 154 | RYHGHSMSDPG  | Pyruvate dehydrogenase complex, E1-alpha polypeptide 1 | Pyruvate_dehydrogenase_kinase_isoenzyme_1_PDP        | S293   | 6,1         |             | 1 | 7,27        | 0,75        | 2 |

|     |             |                                                                |                                                        |       |             |             |   |             |             |   |
|-----|-------------|----------------------------------------------------------------|--------------------------------------------------------|-------|-------------|-------------|---|-------------|-------------|---|
| 155 | HFTMRSPFKCD | Glutamate receptor ionotropic, N-methyl D-aspartate subunit 2A | CDK5                                                   | S1232 | 7,42        | 0,663438015 | 4 | 7,01        | 1,18        | 2 |
| 156 | FELAFSLDQPD | Mnk2                                                           | nd                                                     | S27   | 6,835       | 0,209582919 | 4 | 7,0175      | 0,402142699 | 4 |
| 157 | SILPFTPPVVK | SMAD2                                                          | ERK                                                    | T8    | 7,91        | 0,352230985 | 3 | 7,223333333 | 0,343931518 | 3 |
| 158 | PLSQETFSDLW | p53                                                            | CK1;DNA-dependent_protein_kinase_catalytic_subunit_ATR | T18   | 9,13        | 0,47003546  | 6 | 8,721666667 | 0,309807288 | 6 |
| 159 | AGSRLTSLRG  | NPR-B                                                          | autophosphorylation / nd                               | T516  | 7,52        | 0,517880295 | 6 | 7,754       | 0,27426994  | 5 |
| 160 | PTHSPYAQPSS | p73                                                            | ABL                                                    | Y99   | 1,005       | 1,005       | 2 | 0           | 0           | 2 |
| 161 | AQKSSSPAPAD | Ras-GTPase-activating protein SH3-domain-binding protein       | nd                                                     | S232  | 3,512       | 2,881606496 | 5 | 0           | 0           | 1 |
| 162 | QEEGSSQGEDS | SMC1                                                           | ATM                                                    | S957  | 6,9475      | 0,450187461 | 4 | 7,053333333 | 0,247969532 | 3 |
| 163 | LRRSLRSMSQ  | Telethonin                                                     | nb / Titin                                             | S157  | 4,28        | 2,549941176 | 4 | 0           | 0           | 1 |
| 164 | YSPPGSPPPGD | Ribosomal protein S6 kinase alpha 4                            | p38MAPK / MAPK14;MEK1                                  | S347  | 6,3225      | 0,803939519 | 4 | 6,386666667 | 0,750880964 | 3 |
| 165 | VGKIFSNVRIN | Caveolin 1                                                     | CK2                                                    | S88   | 7,065       | 0,626438345 | 4 | 7,365       | 0,413370294 | 4 |
| 166 | FDGPLSPPLSI | Neurogenic differentiation factor 1                            | EphB2                                                  | S274  | 5,195       | 1,304259049 | 6 | 6,764       | 2,213401003 | 5 |
| 167 | GPRRRSRKPEA | Centromeric protein a                                          | Aurora_kinase_B                                        | S7    | 7,143333333 | 0,376637167 | 6 | 7,096       | 0,653011485 | 5 |
| 168 | GQTPSSSSIPS | MRVI1                                                          | cGKI-beta                                              | S696  | 0           | 0           | 1 | 1,215       | 1,215       | 2 |
| 169 | DIEVESDEEQP | MAX protein                                                    | CK2                                                    | S11   | 7,852       | 0,644279442 | 5 | 7,368       | 0,562437552 | 5 |
| 170 | KFSKFSLYKQL | PLD1                                                           | PKCalpha                                               | S561  | 6,81        | 0,519374624 | 4 | 5,22        | 2,667995502 | 5 |
| 171 | PTTPLSPTRL  | Lamin B1                                                       | CDC2                                                   | S23   | 7,6975      | 0,543984145 | 4 | 6,946666667 | 0,18372685  | 3 |
| 172 | GNIYISPLKSP | Retinoblastoma 1                                               | pRB_kinase                                             | S807  | 8,684       | 0,190850727 | 5 | 8,633333333 | 0,303131801 | 6 |
| 173 | KGGAASGSDSA | Peptidyl prolyl cis/trans isomerase nima interacting, 4        | CK2                                                    | S19   | 2,18        | 2,017037431 | 5 | 3,425       | 1,865       | 2 |
| 174 | AVRLRSSVPGV | Vimentin                                                       | Rho_kinase                                             | S72   | 8,153333333 | 0,411487815 | 6 | 7,973333333 | 0,574504618 | 6 |
| 175 | NIHGSDSVES  | Nucleoside diphosphate kinase A                                | Nucleoside_diphosphate_kinase_A                        | S120  | 6,306       | 0,331638357 | 5 | 5,7325      | 1,260800837 | 4 |
| 176 | EPNPNSPANQ  | Ubiquitin conjugating enzyme E2A                               | CDK2                                                   | S120  | 2,68        | 2,68        | 2 | 5,76        | 5,76        | 1 |
| 177 | NQNSSSDSEAE | T-cell transcription factor 4                                  | CK2                                                    | S60   | 7,245       | 0,253031619 | 4 | 7,646666667 | 0,27716822  | 3 |
| 178 | ELRRMSDEFVD | BCL2 antagonist of cell death                                  | PKA;AKT1                                               | S118  | 5,926666667 | 0,77172246  | 3 | 6,5025      | 0,479811161 | 4 |
| 179 | IRYIESLQELL | Myogenic factor 5                                              | CK2                                                    | S130  | 9,088333333 | 0,607986202 | 6 | 9,031666667 | 0,213652106 | 6 |
| 180 | LPSTQSLNIKS | Myocyte specific enhancer factor 2C                            | Big_MAP_kinase_1                                       | S387  | 6,87        | 0,486703195 | 5 | 7,292       | 0,47097346  | 5 |
| 181 | EEKQKSDAEED | Calnexin                                                       | CK2                                                    | S564  | 7,55        | 0,595063022 | 6 | 7,29        | 0,437949769 | 5 |
| 182 | LVDTASPSME  | Cyclin B1                                                      | Polo_like_kinase                                       | S126  | 3,606666667 | 2,557203334 | 3 | 3,45        | 3,492699529 | 4 |
| 183 | YGGLTSPGLSY | Keratin 8                                                      | p42_kinase                                             | S431  | 8,332       | 0,233700663 | 5 | 8,336666667 | 0,469100795 | 6 |
| 184 | QQLQLSPLKGL | Ribonucleotide reductase M2 subunit                            | CDC2                                                   | S20   | 2,8625      | 2,871710074 | 4 | 3,47        | 2,556041862 | 4 |
| 185 | GTRRGSPLLIG | GFAT                                                           | PKC                                                    | S205  | 8,118333333 | 0,433105709 | 6 | 8,085       | 0,300596629 | 6 |
| 186 | GMDYRSCILRP | Thimet oligopeptidase 1                                        | PKA                                                    | S643  | 8,301666667 | 0,27491918  | 6 | 8,036       | 0,208096132 | 5 |
| 187 | DSGIHSGATTT | Beta-catenin                                                   | GSK3beta                                               | S37   | 2,95        | 2,091426945 | 3 | 1,746666667 | 2,58412246  | 3 |
| 188 | ASRMESTGVMG | Adenylate cyclase 3                                            | CaMK-II                                                | S1076 | 5,21        | 5,21        | 1 | 6,5225      | 0,590778089 | 4 |
| 189 | RKKKVSSTKRH | Cytohesin-1                                                    | PKCdelta                                               | S394  | 10,17       | 0,442116124 | 6 | 10,794      | 0,429446155 | 5 |
| 190 | AERRNSILTET | CFTR                                                           | PKA;PKG                                                | S660  | 2,6075      | 2,65606264  | 4 | 6,102       | 0,254589866 | 5 |
| 191 | AESGKASTEV  | Axis inhibitor 1                                               | GSK3beta                                               | S614  | 8,5725      | 0,789948574 | 4 | 9,016       | 1,263813277 | 5 |
| 192 | SDSLSSPTLLA | c-Fos                                                          | EphB2;ERK2                                             | T325  | 7,354       | 0,52591254  | 5 | 7,2775      | 0,504300258 | 4 |
| 193 | PELARYLNRY  | Hrs                                                            | tyrosine kinases / EGFR                                | Y329  |             |             | 0 |             |             | 0 |
| 194 | INGNNYVYIDP | KIT                                                            | KIT to shc/src                                         | Y568  | 4,955       | 0,195       | 2 | 5,015       | 1,085       | 2 |
| 195 | EPENDYEDVEE | Hematopoietic cell specific LYN substrate 1                    | Lyn / nd                                               | Y378  | 6,33        | 0,35        | 2 | 3,3         | 3,3         | 2 |
| 196 | PCTTIYAATE  | SLAM                                                           | Fyn                                                    | Y307  | 4,88        | 4,88        | 1 | 5,513333333 | 0,314783876 | 3 |
| 197 | GVITTTPTPPG | Oncogene Jun-B                                                 | JNK;MAPK                                               | T102  |             |             | 0 | 4,09        | 4,09        | 1 |
| 198 | NegCtrl     | Mixed peptides without STY                                     | na                                                     |       |             |             | 6 |             |             | 6 |
| 199 | SptCtrl     | Used for production/QC                                         | na                                                     |       | 7,858333333 | 0,439447254 | 6 | 8,726666667 | 0,944610443 | 6 |
| 200 | PosCtrl     | Mixed kinase substrate peptides                                | na                                                     |       | 3,406666667 | 2,75208204  | 3 |             |             | 0 |
| 201 | AQDEFYRSGWA | Csk                                                            | Csk                                                    | Y184  | 6,823333333 | 0,200720923 | 3 | 6,585       | 0,415       | 2 |
| 202 | IKDDEYNPCQG | Fgr                                                            | Fgr                                                    | Y412  | 4,1         | 1,37        | 2 | 3,536666667 | 2,509453238 | 3 |
| 203 | GGDDIYEDIK  | VAV2                                                           | lck / nd                                               | Y172  | 8,79        | 0,311822599 | 6 | 8,833333333 | 0,765716803 | 6 |
| 204 | NGRPDYIIVTQ | Aryl hydrocarbon receptor                                      | Src / auto                                             | Y378  | 5,53        | 0,65        | 2 | 4,286666667 | 1,746812971 | 3 |
| 205 | SFLQRYSSDPT | EGF receptor                                                   | EGFR to Grb2                                           | Y1069 | 0           | 0           | 1 | 7,03        | 7,03        | 1 |
| 206 | YDKEYYSVHMK | Hepatocyte growth factor receptor                              | c-Met (catalytic)                                      | Y1235 | 7,04        | 0,451884941 | 3 | 6,804       | 0,442520056 | 5 |



|     |              |                                                               |                                                              |       |             |             |   |             |             |   |
|-----|--------------|---------------------------------------------------------------|--------------------------------------------------------------|-------|-------------|-------------|---|-------------|-------------|---|
| 207 | PGMKIYIDPFT  | EphB1                                                         | EphB1                                                        | Y594  | 3,5025      | 2,310620858 | 4 | 3,543333333 | 1,941834757 | 6 |
| 208 | TLSTLYPSTSS  | STAM1                                                         | EGFR? /nd                                                    | Y198  | 3,73        |             | 1 | 2,68        |             | 1 |
| 209 | SASPYTPEHAA  | p73                                                           | Cyclin_A;Cyclin_B;CDC2;CDK2;Cyclin_E                         | T86   | 5,075       | 0,255       | 2 | 6,693333333 | 1,46000761  | 3 |
| 210 | IRRASTIEMPO  | Phospholamban                                                 | Ca2+Calmodulin_dependent_protein_kinase                      | T17   | 4,825       | 0,165       | 2 | 5,9575      | 3,204250107 | 4 |
| 211 | VVANGTGTGGQ  | Beta glucuronidase                                            | Beta-G1                                                      | T422  | 5,685       | 0,595       | 2 | 7,75        | 1,78        | 2 |
| 212 | DGKEIYNTIRR  | RasGAP                                                        | EGFR;Lck nota bene negatively regulates GAP                  | Y460  | 5,216666667 | 0,918126111 | 3 | 2,27        | 2,27        | 2 |
| 213 | RPRSCTWPLQR  | Forkhead box protein O3A                                      | Serum/glucocorticoid_regulated_kinase;AKT1                   | T32   | 8,058333333 | 0,902430361 | 6 | 7,056666667 | 0,50910597  | 6 |
| 214 | GDAAEPPRPR   | MEK1                                                          | CDK5                                                         | T286  | 4,553333333 | 3,288569429 | 3 | 4,02        |             | 1 |
| 215 | AKYMETVKLLD  | Vaccinia related kinase 1                                     | nd                                                           | T305  | 7,993333333 | 0,634262476 | 6 | 8,388       | 0,646541569 | 5 |
| 216 | NDDDVYRSLEE  | VAV2                                                          | Tec (EGFR) / EGFR                                            | Y142  | 7,036       | 0,953742104 | 5 |             |             | 0 |
| 217 | SHLRNSPEDKR  | Eukaryotic translation initiation factor 4E binding protein 1 | Dual-specificity_tyrosine_phosphorylation-regulated_kinase_2 | S101  | 6,5         | 0,73774431  | 3 | 7,423333333 | 0,913248171 | 3 |
| 218 | DPRLSPQPPA   | Myocyte specific enhancer factor 2D                           | ERK5                                                         | S180  | 2,305       | 2,305       | 2 | 6,25        | 6,25        | 2 |
| 219 | EKKEESEESDD  | Ribosomal phosphoprotein large P2                             | nd                                                           | S102  | 5,14        | 1,75097687  | 5 | 10,74       |             | 1 |
| 220 | TGLYKSRQPCV  | BTEB2                                                         | PKC                                                          | S153  | 0           |             | 1 | 1,736666667 | 2,456017553 | 3 |
| 221 | LETVSTQELYS  | CHK2                                                          | CHK2                                                         | T68   | 7,676       | 0,421074815 | 5 | 6,88        | 0,581205643 | 4 |
| 222 | TVAENTADELA  | AF6                                                           | BCR-kinase                                                   | T893  | 6,012       | 0,825430797 | 5 | 5,41        | 0,15        | 2 |
| 223 | HPPVLTPPDQE  | Protein kinase C, beta-1                                      | autophos / nd                                                | T641  | 2,79        | 0,79        | 2 | 5,556666667 | 0,721587756 | 3 |
| 224 | PATDLYQVPPG  | p130CAS                                                       | c-Src                                                        | Y165  | 4,62        | 0,1         | 2 | 6,41        |             | 1 |
| 225 | SPHNPISVSS   | SMAD1                                                         | Activin_A_receptor_type_I_TGF_beta_receptor_type_I           | S463  | 6,51        | 0,08        | 2 | 6,08        |             | 1 |
| 226 | GATMKTFCGTP  | AKT1                                                          | PDK1                                                         | T308  | 6,396666667 | 0,315101395 | 3 | 4,45        | 2,636218883 | 4 |
| 227 | SAQGSVSLTA   | HLA-B                                                         | nd                                                           | S359  |             |             | 0 | 6,765       | 0,255       | 2 |
| 228 | DIDNYSEEEEE  | Phosphofurin acidic cluster sorting protein 1                 | CK2                                                          | S278  | 7,542       | 0,68045279  | 5 | 7,931666667 | 0,379447698 | 6 |
| 229 | VPKRKSLVGTP  | p21 activated protein kinase 6                                | nd                                                           | S560  | 7,448333333 | 0,413860551 | 6 | 6,696       | 1,007543547 | 5 |
| 230 | GSRSSAIGIE   | RAP1 GTPase activating protein 1                              | PKA (neg. to Ras)                                            | S499  | 0           |             | 1 | 5,133333333 | 3,637529687 | 3 |
| 231 | WPWQVSLRTRF  | Plasminogen                                                   | nd                                                           | S597  | 6,09        |             | 1 | 6,43        | 0,63        | 4 |
| 232 | PPVPATPYEAF  | SP1B transcription factor                                     | ERK1                                                         | T56   | 8,414       | 0,759489302 | 5 | 8,258333333 | 0,508377047 | 6 |
| 233 | LSRHSSPHQSE  | Glycogen synthase 1                                           | GSK3β / CK2alpha_1                                           | S653  | 6,0025      | 0,464132255 | 4 | 6,895       | 0,175       | 2 |
| 234 | YRERMSSNRPN  | Meprin,beta subunit                                           | PKC                                                          | S687  | 6,655       | 0,197040605 | 4 | 6,525       | 0,653509755 | 4 |
| 235 | DDLMLSPDIE   | p53                                                           | Homeodomain_interacting_protein_kinase_2                     | S46   | 6,415       | 0,643603139 | 4 | 6,783333333 | 0,337276675 | 3 |
| 236 | KQQPGSPRRIS  | Retinoblastoma like 1                                         | nd                                                           | S975  | 8,926666667 | 0,299592316 | 6 | 8,516666667 | 0,455582655 | 6 |
| 237 | RVRASSDGEET  | IRS 1                                                         | CK2beta                                                      | s330  | 1,745       | 1,745       | 2 | 4,6825      | 1,001807741 | 4 |
| 238 | PESIHSFIGDG  | mTOR                                                          | mTOR                                                         | S2481 | 6,99        | 0,348425028 | 3 | 6,4475      | 0,506871532 | 4 |
| 239 | WKTRLSYFLQN  | RGS2                                                          | PKG1alpha                                                    | S46   | 8,271666667 | 0,271625764 | 6 | 8,515       | 0,393033077 | 4 |
| 240 | AGALASSSKEE  | Cystatin 4                                                    | nd                                                           | S21   | 7,334       | 0,107814656 | 5 | 7,56        | 0,815434445 | 6 |
| 241 | SVRRASSADDI  | Potassium channel, voltage gated subfamily H, member 2        | PKA                                                          | S285  | 7,21        | 0,804288505 | 5 | 7,615       | 0,978991828 | 4 |
| 242 | LRRQHSYDTFV  | NR2B                                                          | CaMKII;PKC                                                   | S1303 | 7,465       | 0,434961684 | 6 | 7,414       | 0,387071053 | 5 |
| 243 | MQPDNSSDSY   | CD5                                                           | ? / PKA                                                      | T434  | 8,2         | 0,814902857 | 6 | 8,3075      | 0,730971101 | 4 |
| 244 | LSRMGSLRAPV  | E2F transcription factor 1                                    | CHK2                                                         | S364  | 3,384       | 2,937744713 | 5 | 4,89        | 0,985122666 | 3 |
| 245 | PEFPLSPPKKK  | Stathmin 1                                                    | p34cdc2                                                      | S38   | 8,016666667 | 0,628163107 | 6 | 8,251666667 | 0,446632461 | 6 |
| 246 | RERLASTNDKG  | Estrogen receptor, alpha                                      | AKT2                                                         | S167  | 2,29        | 2,698944238 | 4 | 4,64        | 2,184162692 | 6 |
| 247 | PEKRASPKPA   | Microtubule associated protein 4                              | CDC2_kinase                                                  | S787  | 2,6725      | 1,545645092 | 4 | 4,1525      | 2,461263649 | 4 |
| 248 | GRLRKSLPSLL  | Complement component 5 receptor 1                             | nd                                                           | S314  | 8,266666667 | 0,439987374 | 6 | 8,446       | 0,670450595 | 5 |
| 249 | LARRPSYRKIL  | Activating transcription factor 1                             | CaMKII / CaMKI;PKA;S6K                                       | S63   | 9,924       | 0,191791554 | 5 | 9,424       | 0,477434812 | 5 |
| 250 | TRVPPSRRGPD  | Alpha 2A adrenergic receptor                                  | PKC                                                          | S232  | 9,138333333 | 0,206754014 | 6 | 8,4325      | 0,501765633 | 4 |
| 251 | FWSTLSP1APR  | ELK 1                                                         | p38MAPK / MAPK14;p46SAPK;p54SAPK                             | S383  | 8,866666667 | 0,076084748 | 6 | 7,996       | 0,590071182 | 5 |
| 252 | NGYISAELR    | Calmodulin 1                                                  | CK2                                                          | S82   | 8,188333333 | 0,416629998 | 6 | 7,518       | 0,381439379 | 5 |
| 253 | NKARLSITGSV  | Glutamate receptor ionotropic, AMPA 4                         | nd                                                           | S862  | 9,675       | 0,385605584 | 6 | 9,038333333 | 0,631939255 | 6 |
| 254 | GFSRKSHTFLP  | CNPase                                                        | PKC                                                          | S9    | 10,025      | 0,336043152 | 6 | 9,33        | 0,606575085 | 6 |
| 255 | RLKSISERLSV  | Aquaporin 0                                                   | PKA                                                          | S331  | 9,151666667 | 0,408020288 | 6 | 8,708333333 | 0,669114257 | 6 |
| 256 | GSEGDSSESGEE | Serum response factor                                         | P90RSK / MAPKAP/ CaMK4 / CK2                                 | S83   | 8,4875      | 0,223425043 | 4 | 8,052       | 1,084424271 | 5 |
| 257 | ADGMLTFCGPK  | Crystallin, alpha A                                           | nd                                                           | T140  | 7,325       | 1,715       | 2 | 1,28        | 1,28        | 2 |
| 258 | DNEYFYVDFRE  | FMS-related tyrosine kinase 3                                 | FLT - (catalytic) FMS-related_tyrosine_kinase_3              | Y591  | 5,3325      | 3,095217076 | 4 | 7,026       | 0,581914083 | 5 |

|     |              |                                                     |                                                                |       |             |             |   |             |             |   |
|-----|--------------|-----------------------------------------------------|----------------------------------------------------------------|-------|-------------|-------------|---|-------------|-------------|---|
| 259 | TTVELYSLAER  | Protein kinase C, theta                             | Lck                                                            | Y90   | 6,03        | 0,952575456 | 3 | 2,063333333 | 2,917993984 | 3 |
| 260 | PRQLNYIQVEL  | FRS3                                                | TrkB couples to shc                                            | Y417  | 5,4         |             | 1 | 5,063333333 | 2,014982768 | 3 |
| 261 | QRLFRSPSPMC  | CDC 25B                                             | Chk1/Chk2 Eg3_kinase                                           | S342  | 3,136666667 | 2,240124005 | 3 | 0           | 0           | 2 |
| 262 | NegCtrl      | Mixed peptides without STY                          | na                                                             |       |             |             |   |             |             |   |
| 263 | SptCtrl      | Used for production/QC                              | na                                                             |       | 7,514       | 0,278539046 | 5 | 7,864       | 0,665329993 | 5 |
| 264 | PosCtrl      | Mixed kinase substrate peptides                     | na                                                             |       | 0           | 0           | 3 | 0,5575      | 0,965618325 | 4 |
| 265 | HPFLRRNSGC   | Aralkylamine N-acetyltransferase                    | PKA                                                            | S205  | 7,565       | 1,435       | 2 | 5,62        |             | 1 |
| 266 | AVSEEYLDLRL  | FGF receptor 4                                      | FGFR4 to PLC                                                   | Y754  | 7,23        | 0,568272235 | 6 | 7,8525      | 0,14703316  | 4 |
| 267 | TIEDSYTKICS  | Ras-related protein                                 | EphB2                                                          | Y66   | 7,2         |             | 1 | 7,23        | 1,09        | 2 |
| 268 | TDNEDYEHDE   | 3BP2                                                | SYK                                                            | Y174  | 7,1275      | 0,772508091 | 4 | 7,1         | 0,486894924 | 3 |
| 269 | MTRDIYETDYY  | IGF-I receptor                                      | Insulin_receptor                                               | Y1185 | 7,7475      | 0,362999656 | 4 | 7,832       | 0,637350767 | 5 |
| 270 | IKEDVYLSDH   | Protein tyrosine kinase 6                           | Lck/Protein_tyrosine_kinase_6                                  | Y342  | 6,3825      | 0,609974385 | 4 | 6,86        | 0,358161975 | 5 |
| 271 | DESVDYVPLMD  | PDGF receptor, beta                                 | PDGFR auto to PI3K / SHP2                                      | Y751  | 5,906666667 | 0,471192341 | 3 | 5,77        | 1,278775456 | 3 |
| 272 | KEDPIYDEPEG  | Docking protein 1                                   | Insulin_receptor                                               | Y362  | 6,7         |             | 1 | 4,42        | 4,42        | 2 |
| 273 | QELRKTFKIEI  | Melanocortin 4 receptor                             | PKA_GRK                                                        | T312  | 8,1475      | 0,455871418 | 4 | 8,268333333 | 0,582563778 | 6 |
| 274 | SFAPSTPLTGR  | Retinoblastoma like 1                               | CDK4                                                           | T369  | 1,29        | 2,029837432 | 5 | 3,065       | 3,065       | 2 |
| 275 | LKGGPTAPFPH  | C/EBP Epsilon                                       | MAPK                                                           | T74   | 7,24        | 0,04        | 2 | 7,913333333 | 1,001509971 | 3 |
| 276 | MAKRNTVIGTP  | Serine/Threonine protein kinase4                    | Serine/threonine_protein_kinase_3                              | T180  |             |             | 0 | 7,17        |             | 1 |
| 277 | LNRIQTQIRVV  | ATP2B1                                              | PKC                                                            | T1117 | 7,41        | 0,741754676 | 5 | 7,958       | 0,281382302 | 5 |
| 278 | RGDVFMPPEDE  | Vitronectin                                         | CK2                                                            | T69   | 5,23        |             | 1 | 4,88        | 2,58        | 2 |
| 279 | NPCAYTPPSLK  | Protein phosphatase 1, regulatory subunit 1B        | CDK5                                                           | T75   |             |             | 0 | 6,92        | 1,61        | 2 |
| 280 | QQTNDYMQPEE  | Actinin alpha 1                                     | FAK                                                            | Y12   | 7,06        |             | 1 | 6,214       | 0,975327637 | 5 |
| 281 | IGADSSEEKFL  | Statherin                                           | nd                                                             | S22   | 8,513333333 | 0,345478734 | 6 | 8,851666667 | 0,466955268 | 6 |
| 282 | EKCSDSQSWED  | Tumor protein p53 binding protein 1                 | ATM                                                            | S784  | 8,486666667 | 0,195334471 | 6 | 8,635       | 0,255065351 | 6 |
| 283 | GSPSVCSSMS   | SMAD2                                               | Activin_receptor_like_kinase_4_TGF_beta_receptor_type_I        | S464  | 4,16        | 2,942481946 | 3 | 4,24        | 0,97        | 2 |
| 284 | QTARKSTGGKA  | H3 histone, family 3A                               | JNK2                                                           | S29   | 7,868       | 0,224802135 | 5 | 7,734       | 0,560271363 | 5 |
| 285 | IPRRTTQRIVA  | Collapsin response mediator protein 2               | Rho-kinase                                                     | T555  | 6,8975      | 1,097323448 | 4 | 7,3375      | 0,938972177 | 4 |
| 286 | IPTGTTQQRKS  | Kinesin like protein 1                              | p34cdc2;cyclin_B                                               | T927  | 6,42        | 0,779384372 | 5 | 7,845       | 0,275       | 2 |
| 287 | MSSPPPARG    | MAPK12                                              | p38MAPKgamma / MAPK12                                          | S3    | 6,595       | 0,645       | 2 | 7,25        |             | 1 |
| 288 | HQYFMTEYVAT  | ERK5                                                | mkk5 / nd                                                      | T218  |             |             | 0 | 2,99        |             | 1 |
| 289 | GYMPMPGVAP   | IRS 1                                               | mTor / nd                                                      | s616  | 7,556       | 0,375691363 | 5 | 7,99        | 0,508684578 | 5 |
| 290 | PEPYASPPQPG  | Steroidogenic factor 1                              | ERK2                                                           | S203  | 3,562       | 2,920468456 | 5 | 1,963333333 | 2,776572627 | 3 |
| 291 | KKWKQSVRLIS  | Death associated protein kinase 1                   | Death_associated_protein_kinase_1 / is Ca-Calmodulin regulated | S308  | 6,3425      | 0,900982103 | 4 | 6,555       | 0,785       | 2 |
| 292 | TSSSSPPGTP   | CCAAT/Enhancer binding protein, beta                | p90RSK                                                         | T266  | 3,34        | 2,26        | 2 | 2,98        | 2,98        | 2 |
| 293 | IKQGEKHSA    | Phosphoinositide-3-kinase, catalytic subunit, gamma | nd                                                             | S1100 | 1,79        |             | 1 | 5,18        |             | 1 |
| 294 | LLMIISQKDTF  | Telomeric repeat binding factor 1                   | ATM                                                            | S219  | 7,358       | 0,330901798 | 5 | 7,535       | 0,408686922 | 4 |
| 295 | DSPPASPLQRQ  | Syntrophin alpha 1                                  | p38MAPKgamma/MAPK12                                            | S193  | 3,9675      | 3,105546449 | 4 | 5,35        |             | 1 |
| 296 | ARKKFSGLEIS  | Sucrase isomaltase                                  | ? / PKA                                                        | S7    | 7,596       | 0,334879083 | 5 | 8,08        | 0,256904652 | 4 |
| 297 | LSPLPSQAMDD  | p53                                                 | DNA-dependent_protein_kinase_catalytic_subunit_208900_ATR      | S37   | 6,568       | 1,179955931 | 5 | 7,24        | 0,465295605 | 4 |
| 298 | TQRQNSAQLGM  | CDC 25A                                             | Cell_cycle_checkpoint_kinase                                   | S123  | 5,885       | 0,525       | 2 | 7,335       | 0,705       | 2 |
| 299 | SSRRQSVLVKS  | Glutamate receptor, ionotropic kainate 2            | PKA                                                            | S715  | 8,518       | 0,381701454 | 5 | 8,156       | 0,130015384 | 5 |
| 300 | SALLSQISS    | NFKB3                                               | IKKbeta                                                        | S536  | 6,01        | 1,235826309 | 3 | 6,974       | 0,322279382 | 5 |
| 301 | RPRTTSFAESC  | Glycogen synthase kinase 3 beta                     | Akt/PKB / PKA                                                  | S9    | 4,96        |             | 1 | 2,095       | 2,095       | 2 |
| 302 | GISQESSEEEQ  | High mobility group AT-hook 1                       | CK2                                                            | S102  | 7,19        | 0,538330753 | 4 | 7,28        | 0,546900357 | 6 |
| 303 | LNRTLMSLSLP  | Glycogen synthase 1                                 | PKA                                                            | S8    | 7,59        |             | 1 | 7,16        | 0,435775171 | 4 |
| 304 | RGQRDSSYYWE  | RAF1                                                | PAK1;PAK3                                                      | S338  | 8,678333333 | 0,14088017  | 6 | 8,71        | 0,180831413 | 6 |
| 305 | VNPSISPAHGV  | SRC1                                                | ERK2                                                           | S395  | 6,86        | 0,51        | 2 | 6,94        | 0,389444048 | 3 |
| 306 | AHRKGSSSNPE  | c-Fos                                               | MAPKinase;EphB2;ERK2                                           | T232  | 5,825       | 0,515       | 2 | 5,36        |             | 1 |
| 307 | AGIQTSTFRTGN | DDX5                                                | PKC                                                            | S557  | 8,163333333 | 0,319617827 | 6 | 8,1325      | 0,466120961 | 4 |
| 308 | AVGSLSGAEGV  | MAZ                                                 | CK2                                                            | S480  | 6,176666667 | 0,863416984 | 3 | 6,26        | 1,053494186 | 4 |
| 309 | EAKRKSPPKKE  | Coilin                                              | CDK2-cyclin_E                                                  | S184  | 8,513333333 | 0,910762806 | 6 | 8,614       | 0,305129481 | 5 |
| 310 | TTTAPSLSGKG  | Beta-catenin                                        | Gsk3 (on T41) / CK1                                            | S45   | 4,023333333 | 2,865034419 | 3 |             |             | 0 |

|     |              |                                                           |                                                       |       |             |             |   |             |             |   |
|-----|--------------|-----------------------------------------------------------|-------------------------------------------------------|-------|-------------|-------------|---|-------------|-------------|---|
| 311 | TACTPSDGGPGG | Opioid receptor                                           | Beta-adrenergic_receptor_kinase1                      | S363  |             |             | 0 | 0           | 0           | 2 |
| 312 | GDSDASSPRSN  | Myogenic differentiation antigen 1                        | Cyclin_dependent_kinase                               | S200  | 5,05        | 0,746904724 | 3 | 3,155       | 3,155       | 2 |
| 313 | PVARTSPLQTP  | Bcl 2                                                     | JNK1                                                  | S70   | 8,326666667 | 0,61239058  | 3 | 6,79        | 0,532353266 | 4 |
| 314 | KVRFNSVSSYS  | Nitric oxide synthase 1                                   | PKG / CAMKIIalpha;CAMKIIalpha;CAMKIV;PKA;PKC          | S852  | 8,09        | 0,315277655 | 5 | 7,851666667 | 0,309053214 | 6 |
| 315 | LSPSPSSRVTV  | Lamin B1                                                  | PKC                                                   | S395  | 8,74        | 0,445600718 | 5 | 8,643333333 | 0,565734527 | 6 |
| 316 | DTLSDSDDEDD  | N-myc                                                     | CK2                                                   | S263  | 7,921666667 | 0,503501627 | 6 | 7,392       | 0,320711709 | 5 |
| 317 | RSGLCSPSYVA  | c-Myc                                                     | JNK1                                                  | S62   | 8,3         | 0,389717847 | 5 | 8,272       | 0,593578975 | 5 |
| 318 | ERKSSSSSEDR  | B-Raf                                                     | AKT1                                                  | S427  | 2,8425      | 2,898934071 | 4 | 5,575       | 0,877909449 | 4 |
| 319 | HSLPFLPSQPM  | CBL                                                       | PKC                                                   | S619  | 7,303333333 | 0,50341059  | 3 | 7,565       | 0,732114517 | 6 |
| 320 | GTGDTSSSEDE  | Transcription factor IIA, 1                               | CKI / CK II / TFIIID;CK2                              | S280  | 7,37        | 0,328207252 | 5 | 7,41        | 0,284165445 | 4 |
| 321 | VNLINYQDDAE  | Beta-catenin                                              | FER;Fyn                                               | Y142  | 6,833333333 | 0,408275506 | 3 | 6,775       | 0,465       | 2 |
| 322 | GWMVHYTSKDT  | Protein kinase C, mu                                      | c-Src;ABL                                             | Y432  | 6,275       | 0,22961925  | 4 | 7,425       | 0,765196053 | 4 |
| 323 | STEPQYQGEN   | c-Src                                                     | Csk;Fgr_PTPase                                        | Y530  | 5,865       | 0,825       | 2 | 2,83        | 2,83        | 2 |
| 324 | FTRRASVCAEA  | Protein kinase, cAMP dependent, regulatory, type II, beta | Protein_kinase_cAMP_dependent_regulatory_type_II_beta | S114  | 2,815       | 2,815       | 2 | 0           |             | 1 |
| 325 | MPDNLYTFVLK  | LNK                                                       | ZAP70                                                 | Y273  | 3,1         | 3,111623371 | 4 | 4,01        | 2,846412947 | 3 |
| 326 | NegCtrl      | Mixed peptides without STY                                | na                                                    |       |             |             |   |             |             |   |
| 327 | SptCtrl      | Used for production/QC                                    | na                                                    |       | 9,306666667 | 0,384649913 | 6 | 9,23        | 0,324756319 | 6 |
| 328 | PosCtrl      | Mixed kinase substrate peptides                           | na                                                    |       | 3,1425      | 3,148955184 | 4 | 4,48        |             | 1 |
| 329 | ETNNDYETADG  | CD32                                                      | Lyn;Blk;Fyn;SYK                                       | Y279  | 5,955       | 0,125       | 2 | 6,936       | 0,237957979 | 5 |
| 330 | EELAEYAEIRV  | SIGLEC4A                                                  | Fyn                                                   | Y620  | 6,01        |             | 1 | 7,2         | 0,07        | 2 |
| 331 | VYESPYSDPEE  | ZAP70                                                     | ZAP70                                                 | Y319  | 8,63        | 0,42        | 2 | 8,716       | 0,246300629 | 5 |
| 332 | MNEVTYSTLNF  | Carcinoembryonic antigen-related cell adhesion molecule 1 | MLK2 / MAP3K10                                        | S508  | 2,59        |             | 1 | 5,47        |             | 1 |
| 333 | TAEPDYGALYE  | Phospholipase C, gamma1                                   | Lyn                                                   | Y771  | 8,548       | 0,538159828 | 5 | 8,986666667 | 0,403553659 | 6 |
| 334 | LEDNDYGRAVD  | AKT1                                                      | c-Src/RTPK                                            | Y326  | 4,1         | 1,61        | 2 | 6,053333333 | 0,919142112 | 3 |
| 335 | LVNRHYAKISD  | ZAP70                                                     | autophosphorylation / SHC                             | Y474  | 5,735       | 0,595       | 2 | 3,055       | 3,055       | 2 |
| 336 | LRRGEYDPYQQ  | Crystallin gamma B                                        | nd                                                    | Y63   | 6,113333333 | 1,253537217 | 3 | 5,32        | 1,14        | 2 |
| 337 | ESRASTFCGTP  | Protein kinase C delta                                    | PDK1 / Lck                                            | T507  | 2,145       | 2,145       | 2 | 0           |             | 1 |
| 338 | LLNVFTPQKTL  | MAPK10                                                    | CDK5                                                  | T131  | 7,333333333 | 0,665624185 | 6 | 7,626       | 0,71673147  | 5 |
| 339 | CERPLTQEELL  | TCFL1                                                     | CAMKII                                                | T168  | 4,64        | 2,283873902 | 5 | 5,5625      | 0,586232676 | 4 |
| 340 | EDSTYYKASKG  | FAK                                                       | c-Src                                                 | Y577  | 7,808       | 0,76229653  | 5 | 8,091666667 | 0,383945164 | 6 |
| 341 | LALSLTADQMV  | Estrogen receptor, alpha                                  | p38MAPK MAPK14                                        | T311  | 5,345       | 0,795       | 2 | 5,84        | 0,535972636 | 3 |
| 342 | IEQFSTVKGVN  | G protein coupled receptor kinase 5                       | G_protein_coupled_receptor_kinase_5                   | T485  |             |             | 0 | 6,19        |             | 1 |
| 343 | LTTGGTLKISD  | LKB1                                                      | LKB1                                                  | T189  |             |             | 0 | 0           | 0           | 2 |
| 344 | RRGDSYDLKDF  | VAV1                                                      | ZAP70 / PKA                                           | Y441  | 7,49        | 0,06        | 2 | 7,3         | 0,443001129 | 4 |
| 345 | EPLPPSYVACS  | Erythropoietin receptor                                   | JAK2                                                  | Y504  | 3,765       | 0,635       | 2 |             |             | 0 |
| 346 | ASRPSSRSYV   | Vimentin                                                  | PAK                                                   | S26   | 8,242       | 0,348218322 | 5 | 8,3325      | 0,727886495 | 4 |
| 347 | PERRDSQDGSS  | LASP1                                                     | cGKIIalpha;cGKIIbeta;cGKII;cAK                        | S146  | 3,292       | 2,79741595  | 5 | 4,005       | 2,556917089 | 4 |
| 348 | RGRLRSADSEN  | MEKK3                                                     | PKA                                                   | S337  | 4,9125      | 2,985074329 | 4 | 4,196666667 | 2,783646689 | 3 |
| 349 | KKKICTRKPRF  | Metabotropic glutamate receptor 1                         | PKC                                                   | T695  | 10,42       | 0,5483308   | 6 | 9,868333333 | 0,672716301 | 6 |
| 350 | ESLESTRRILG  | SNAP23                                                    | PKCalpha                                              | T24   | 0           |             | 1 | 6,693333333 | 0,898344156 | 3 |
| 351 | FPAPQTPGRLQ  | ADAM 17                                                   | EphB2                                                 | T735  |             |             | 0 | 5,276666667 | 1,162076685 | 3 |
| 352 | KDNGYISAAE   | Calmodulin 1                                              | CK2                                                   | T118  | 7,41        | 0,16        | 2 | 6,605       | 0,180762275 | 4 |
| 353 | RTAASSLALVS  | Uridine nucleotide receptor                               | nd                                                    | S334  | 5,313333333 | 1,25947961  | 3 | 6,44        |             | 1 |
| 354 | SDTVTSPQRAG  | c-Src                                                     | Cdk5                                                  | S75   | 2,27        | 2,27        | 2 | 0           |             | 1 |
| 355 | RKRRWSAPESR  | Ataxin 1                                                  | Akt / ATK1                                            | S776  | 8,641666667 | 0,212557182 | 6 | 8,735       | 0,308693483 | 6 |
| 356 | KKRKRSRWNQD  | Splicing factor 1                                         | PKG-1                                                 | S20   | 9,343333333 | 0,131993266 | 6 | 8,916666667 | 0,161932771 | 6 |
| 357 | SAIRQSPSPPP  | cAMP-specific 3',5'-cyclic phosphodiesterase 4A           | nd                                                    | S447  | 5,29        | 1,31828171  | 3 | 3,725       | 3,725       | 2 |
| 358 | RTRTDSYSAGQ  | mTOR                                                      | PI3K pathway (autophos?) /AKT                         | S2448 | 0,755       | 1,30769836  | 4 | 6,3         | 0,681909085 | 3 |
| 359 | TNNKGSAAWMA  | MAP3K7                                                    | TAK1/MAP3K7                                           | S192  | 7,241666667 | 1,330907168 | 6 | 7,784       | 0,42349026  | 5 |
| 360 | SDTTTTFCGTP  | Serum/glucocorticoid regulated kinase 3                   | 3-Phosphoinositide_dependent_protein_kinase_1         | T320  | 3,495       | 3,495       | 2 | 3,005       | 1,757903581 | 4 |
| 361 | RERGESPTTTP  | MLK3 / MAP3K11                                            | AKT1                                                  | S674  | 2,455       | 2,465405646 | 4 |             |             | 0 |
| 362 | YFRYLSEVASG  | 14-3-3 Beta                                               | PKCzeta                                               | S131  | 7,816666667 | 0,677191914 | 6 | 7,823333333 | 0,600878986 | 6 |

|     |             |                                                          |                                                             |       |             |             |   |             |             |   |
|-----|-------------|----------------------------------------------------------|-------------------------------------------------------------|-------|-------------|-------------|---|-------------|-------------|---|
| 363 | WRRKSSDRKGG | HLA-A                                                    | Protein_kinase_cAMP_dependent_regulatory_type_1_alpha       | S337  | 8,53        | 0,322645316 | 6 | 8,438333333 | 0,358395343 | 6 |
| 364 | TEDQYSLVEDD | Phosphatidylinositol 3 kinase, regulatory subunit, alpha | Phosphoinositide-3-kinase_catalytic_subunit_gamma           | S608  | 9,051666667 | 0,472314043 | 6 | 8,8         | 0,303644529 | 6 |
| 365 | RGRGSSVGGGS | ASK1                                                     | AKT1                                                        | S83   | 7,918       | 0,576936738 | 5 | 7,218       | 0,630916793 | 5 |
| 366 | MGQAGSTISNS | Connexin 43                                              | CK1delta                                                    | S325  | 2,28        | 3,376033175 | 5 | 1,2475      | 2,160733382 | 4 |
| 367 | RLRPLSYPTV  | Ras related C3 botulinum toxin substrate 1               | AKT1                                                        | S71   | 8,673333333 | 0,136096371 | 6 | 8,301666667 | 0,501112651 | 6 |
| 368 | QLRGSATRAL  | Casein kinase 1, epsilon                                 | CK1epsilon                                                  | S323  | 8,513333333 | 0,405777717 | 6 | 8,056666667 | 0,398692307 | 6 |
| 369 | RKRKNSRVTF  | NIPP1                                                    | PKA                                                         | S199  | 7,746666667 | 0,233071281 | 6 | 8,065       | 0,316899038 | 6 |
| 370 | IKRQLSMTLRG | PCTAIRE protein kinase 1                                 | PKA                                                         | S12   | 7,53        | 0,345012077 | 6 | 7,886       | 0,497899588 | 5 |
| 371 | LMKSDSYPRFI | Regulator of G protein signaling 7                       | PKCalpha                                                    | S434  | 8,598333333 | 0,419381158 | 6 | 8,736666667 | 0,313138237 | 6 |
| 372 | GHSNSSPRHSE | Heterogeneous nuclear ribonucleoprotein D                | GSK3beta                                                    | S83   | 6,432       | 1,004497885 | 5 | 6,252       | 2,156166969 | 5 |
| 373 | RARSTSLNERP | Tuberin                                                  | AKT1                                                        | S939  | 8,93        | 0,279284801 | 6 | 8,6         | 0,134350288 | 4 |
| 374 | DAPPLSPFPHI | Retinoblastoma like 1                                    | CDK4                                                        | S964  | 9,785       | 0,186971477 | 6 | 11,295      | 0,418917255 | 6 |
| 375 | DYDDMSPRRGP | Heterogeneous nuclear ribonucleoprotein K                | JNK3 / MAPK10                                               | S284  | 7,036666667 | 0,448540844 | 6 | 6,908       | 0,328475265 | 5 |
| 376 | GGARASPATQP | Sam68                                                    | ERK                                                         | S58   | 2,158       | 2,711135555 | 5 | 0,983333333 | 1,390643336 | 3 |
| 377 | NSRRPSRAMWL | Vitronectin                                              | PKA                                                         | S397  | 7,846       | 0,164754363 | 5 | 7,785       | 0,092330927 | 4 |
| 378 | QERRGSNVALM | Protein tyrosine phosphatase nonreceptor 7               | PKA                                                         | S83   | 9,531666667 | 0,372532623 | 6 | 9,526666667 | 0,192498196 | 6 |
| 379 | VHRDLRDRPL  | Kell blood group protein                                 | PKC                                                         | S63   | 8,26        | 0,195703858 | 6 | 7,933333333 | 0,709921748 | 6 |
| 380 | LEVSDSEDEA  | SPIB transcription factor                                | CK2                                                         | S146  | 8,174       | 0,211149236 | 5 | 8,08        | 0,504579032 | 5 |
| 381 | LRRRLSDSFI  | Synapsin II                                              | PKA                                                         | S10   | 9,421666667 | 0,334535333 | 6 | 8,7         | 0,166232769 | 6 |
| 382 | RTRRISQTSQV | Ryanodine receptor 2                                     | PKA                                                         | S2808 | 8,883333333 | 0,241499942 | 6 | 8,334       | 0,187147001 | 5 |
| 383 | APKAPSKKEKK | DAB2                                                     | PKC                                                         | S24   | 6,82        | 0,816374097 | 3 | 6,92        | 0,731334397 | 4 |
| 384 | KVEPASPPYYS | Peroxisome proliferator activated receptor, gamma        | ERK2_JNK1                                                   | S112  | 9,455       | 0,19636276  | 6 | 9,361666667 | 0,305364081 | 6 |
| 385 | HVDNEYSQPPR | CD5                                                      | CK2                                                         | S483  | 4,014       | 2,464196421 | 5 | 5,45        | 1,827147139 | 3 |
| 386 | ETESPYQELQG | DAP12                                                    | SYK                                                         | Y91   | 5,316666667 | 0,793361344 | 3 | 2,885       | 2,885       | 2 |
| 387 | HVEDLYVEGLP | TFII-I                                                   | Bruton's_tyrosine_kinase                                    | Y398  | 7,115       | 0,475       | 2 | 6,786666667 | 0,210607587 | 3 |
| 388 | RNDQVYQPLRD | CD3 Delta                                                | nd                                                          | Y149  | 1,6475      | 1,157829327 | 4 | 3,61        | 2,16        | 2 |
| 389 | ATLDVYNPFET | SCAMP3                                                   | EGFR                                                        | Y41   | 6,476666667 | 0,471475226 | 3 | 7,04        | 0,17        | 2 |
| 390 | NegCtrl     | Mixed peptides without STY                               | na                                                          |       |             |             |   |             |             |   |
| 391 | SptCtrl     | Used for production/QC                                   | na                                                          |       | 9,508333333 | 0,785099074 | 6 | 8,95        | 0,471769718 | 6 |
| 392 | PosCtrl     | Mixed kinase substrate peptides                          | na                                                          |       | 1,5775      | 2,387806263 | 4 | 0,7975      | 1,381310519 | 4 |
| 393 | DEELHYASLNF | CD33                                                     | Src_kinase                                                  | Y340  | 7,95        | 0,454972527 | 5 | 7,792       | 0,339611543 | 5 |
| 394 | GKKATQASQEY | H2AX histone                                             | ATM / nd                                                    | S140  | 5,696666667 | 0,259015229 | 3 | 6,23        | 0,58        | 2 |
| 395 | IENPQYFSDAC | TRKA                                                     | TRKA couples to Shc                                         | Y490  | 3,11        |             | 1 |             |             | 0 |
| 396 | QGVDTYVEMRP | Colony stimulating factor 1 receptor                     | c-Fms couples to Shc / Colony_stimulating_factor_1_receptor | Y809  | 2,665       | 2,665       | 2 | 5,39        |             | 1 |
| 397 | AATMKTCFGTP | AKT3                                                     | PKCzeta                                                     | T305  | 0           |             | 1 | 5,395       | 0,695       | 2 |
| 398 | DNGGFYISPRI | Lck                                                      | SYK                                                         | Y192  | 3,544       | 2,133772247 | 5 | 5,22        | 0,55        | 2 |
| 399 | KTNLSYYEYDK | Bone marrow kinase BMX                                   | FAK                                                         | Y40   | 8,254       | 0,12563439  | 5 | 8,564       | 0,27861084  | 5 |
| 400 | VSNFNYYFHRE | Potassium voltage gated channel subfamily A member 2     | nd                                                          | Y415  | 7,578       | 0,259028956 | 5 | 7,27        | 0,531068106 | 6 |
| 401 | LEPLCTPVVTC | c-Fos                                                    | RSK;PKA                                                     | S362  | 4,535       | 2,736864081 | 4 |             |             | 0 |
| 402 | EEIYLTPVQRP | MAPK8 interacting protein 1                              | JNK1                                                        | T284  | 6,34        |             | 1 | 6,5         | 0,01        | 2 |
| 403 | PVRTYTHEVVT | Cyclin dependent kinase 2                                | cdk7 / nd                                                   | T160  | 2,323333333 | 1,818503658 | 3 | 5,26        |             | 1 |
| 404 | EEGEGYEEPDS | CD19                                                     | ABL                                                         | Y508  | 7,0725      | 0,235199384 | 4 | 6,648       | 0,459451847 | 5 |
| 405 | QPGHPTPPPTP | C/EBP alpha                                              | GSK3                                                        | T229  | 5,96        | 0,74        | 2 | 6,213333333 | 0,536987482 | 3 |
| 406 | ALDFRTPRNAK | Opioid receptor mu 1                                     | Beta-adrenergic_receptor_kinase_2                           | T182  | 7,018       | 0,19436049  | 5 | 6,832       | 0,890626746 | 5 |
| 407 | PEETQTQDQPM | HSP 90A                                                  | dsDNA-activated_protein_kinase                              | T7    | 5,638       | 0,857633955 | 5 | 5,46        | 0,39        | 2 |
| 408 | EGKHLYTLDDG | RACK1                                                    | Src                                                         | Y228  | 6,2         |             | 1 | 5,51        |             | 1 |
| 409 | WPQPLSTLPTS | OCT binding factor 1                                     | nd                                                          | S184  | 5,015       | 0,515       | 2 |             |             | 0 |
| 410 | EFRRLSISAES | Phosphorylase kinase, muscle, alpha-1 subunit            | Phosphorylase_kinase_muscle_alpha-1_subunit                 | S1018 | 7,01        |             | 1 | 6,57        |             | 1 |
| 411 | PAAASSEDIER | Galanin                                                  | nd                                                          | S117  | 5,34        | 0,968194195 | 3 | 6,54        | 0,623912387 | 3 |
| 412 | DHIEVSDDDE  | Hsp90 co-chaperone Cdc37                                 | CK2                                                         | S13   | 6,9875      | 0,543110256 | 4 | 6,828333333 | 0,420452798 | 6 |
| 413 | PEKPKTPQQLW | Upstream binding factor                                  | ERK1/2                                                      | T201  | 6,7         | 0,682104586 | 3 | 6,566       | 0,29608107  | 5 |
| 414 | GAGGYTQSPGG | RPA2                                                     | DNA-dependent_protein_kinase_catalytic_subunit              | T21   | 0           | 0           | 2 | 3,25        | 2,561262709 | 3 |

|     |              |                                                              |                                               |       |             |             |   |             |             |   |
|-----|--------------|--------------------------------------------------------------|-----------------------------------------------|-------|-------------|-------------|---|-------------|-------------|---|
| 415 | GPHRSTPESRA  | Presenilin 1                                                 | CDK5                                          | T354  | 2,64        | 2,31        | 2 |             |             | 0 |
| 416 | KVVALYDMPM   | Bruton's tyrosine kinase                                     | BTK;ABL                                       | Y223  |             |             | 0 | 5,37        |             | 1 |
| 417 | EDTTSTFCGTP  | Serum/glucocorticoid regulated kinase 2                      | 3-Phosphoinositide_dependent_protein_kinase_1 | T253  | 6,776666667 | 0,131993266 | 3 | 6,0475      | 1,19572938  | 4 |
| 418 | GKNRPSSGSLI  | Quinoid dihydropteridine reductase                           | CAMKII                                        | S223  | 7,426       | 0,516782353 | 5 | 6,978       | 1,123804253 | 5 |
| 419 | MSETVPPAPAA  | Histone 1, H1a                                               | CDC2                                          | T4    | 2,754       | 1,743669693 | 5 | 2,24        | 2,24        | 2 |
| 420 | APRQSSPKSS   | DAB1                                                         | CDK5                                          | S491  | 7,556       | 0,438889508 | 5 | 6,973333333 | 0,430993684 | 3 |
| 421 | DVDQGSLLCTSF | IKK alpha                                                    | NIK                                           | S176  | 6,293333333 | 0,34422215  | 3 | 4,9         | 1,266353031 | 4 |
| 422 | TKALQSPKRPR  | TFII-I                                                       | EphB2                                         | S668  | 8,536666667 | 0,176225865 | 6 | 7,976666667 | 0,658702428 | 6 |
| 423 | PTQPTSASPSL  | Carcinoembryonic antigen-related cell adhesion molecule 1    | c-Src                                         | Y493  | 1,444       | 1,775033521 | 5 |             |             | 0 |
| 424 | AAPASSSDPAA  | EIF3S5                                                       | CDK11                                         | S46   | 0           |             | 1 | 0           |             | 1 |
| 425 | GSDSSSESEPE  | MAX protein                                                  | CK2                                           | S142  | 7,996       | 0,341736741 | 5 | 7,676666667 | 0,486335504 | 6 |
| 426 | AKIQASFRGHM  | Neurogranin                                                  | PKCalpha;PKM;PKCgamma;PKCbeta-1               | S36   | 9,325       | 0,283299018 | 6 | 9,095       | 0,469387899 | 6 |
| 427 | SSTPLSPTRIT  | Lamin A/C                                                    | CDC2-kinase                                   | S22   | 7,57        | 0,267656496 | 5 | 7,006       | 0,688958634 | 5 |
| 428 | ETPAISPSKRA  | dUTP pyrophosphatase                                         | CDC2                                          | S99   | 6,898       | 0,938901486 | 5 | 6,1075      | 1,015907845 | 4 |
| 429 | PQSPGSPLEEE  | p47-phox                                                     | CK2                                           | S348  | 7,084       | 0,673634916 | 5 | 7,564       | 0,600353229 | 5 |
| 430 | GSRRGSFDTAG  | Desmoplakin                                                  | PKA                                           | S2849 | 6,36        | 0,09        | 2 | 6,66        | 0,375566239 | 4 |
| 431 | LVRASSDTSE   | Solute carrier family 9, isoform A3, regulatory factor 1     | GRK6A                                         | S290  | 6,97        | 0,06        | 2 | 6,416666667 | 0,849208782 | 3 |
| 432 | NETMLSPREKI  | Retinoblastoma like 2                                        | CDK                                           | S1068 | 5,734       | 0,92607991  | 5 | 6,6425      | 0,280568619 | 4 |
| 433 | SDSRKSMRQST  | TCFL1                                                        | PKC                                           | S132  | 6,6475      | 1,335035112 | 4 | 7,176666667 | 0,762029454 | 3 |
| 434 | EAKRSSADKGV  | Brain sodium channel 2                                       | PKA                                           | S525  | 3,825       | 2,268705578 | 4 | 5,842       | 0,496362771 | 5 |
| 435 | PSAYGSVKAYT  | Annexin II                                                   | PKC                                           | S25   | 8,411666667 | 0,314134614 | 6 | 7,953333333 | 0,441990447 | 6 |
| 436 | NLLPMSPEEFD  | STAT1                                                        | MAPKinase;KIT                                 | S727  | 9,156666667 | 0,410960934 | 6 | 8,983333333 | 0,287556758 | 6 |
| 437 | KVGVSRRINEW  | CALDESMON 1                                                  | CDC2_Kinase                                   | S724  | 7,231666667 | 0,881048933 | 6 | 7,502       | 0,568204189 | 5 |
| 438 | PVRCYSAEVVT  | Cyclin dependent kinase 5                                    | CK1                                           | S159  | 6,483333333 | 1,481256974 | 6 | 6,34        | 0,775983247 | 4 |
| 439 | SERRGSHPYID  | Phosphodiesterase 7A cAMP-specific high-affinity             | Protein_kinase                                | S58   | 7,834       | 0,27861084  | 5 | 7,734       | 0,165481117 | 5 |
| 440 | GGYTQSPGGFG  | RPA2                                                         | CDC2                                          | S23   | 6,553333333 | 0,102740233 | 3 | 6,91        | 0,286705424 | 5 |
| 441 | SWKENSPLNVS  | Coagulation Factor III                                       | PKC                                           | S285  | 7,546       | 0,450670611 | 5 | 7,45        | 0,64136573  | 4 |
| 442 | GSPRVSVTDDS  | Nuclear Factor Of Activated T Cells, Calcineurin-Dependent 1 | DYRK / PKA                                    | S294  | 5,625       | 0,835       | 2 | 6,82        |             | 1 |
| 443 | RSTPESRAAVQ  | Presenilin 1                                                 | GSK3beta                                      | S357  | 3,68        | 2,633983042 | 3 | 3,803333333 | 2,690728939 | 3 |
| 444 | SVRMLSGSKEK  | Opioid receptor mu 1                                         | CAMKII                                        | S268  | 8,973333333 | 0,534529908 | 6 | 8,038       | 0,231637648 | 5 |
| 445 | EKARLSYSDKN  | Protein kinase C delta                                       | PKCdelta                                      | S645  | 7,735       | 0,687671191 | 6 | 7,59        | 0,574920284 | 6 |
| 446 | EKARLSYSDKN  | LKB1                                                         | PKA/ p90RSK;MSK1;S6K1;PKA;LKB1                | S424  | 8,873333333 | 0,337424889 | 6 | 8,095       | 0,563404828 | 6 |
| 447 | NRSFLSLKHTP  | Notch2                                                       | GSK3beta / nd                                 | S2070 | 6,232       | 0,369507781 | 5 | 6,654       | 0,514066144 | 5 |
| 448 | LVSPDPSRSD   | Leukemia inhibitory factor receptor, alpha                   | MAPKinase                                     | S1044 | 7,056       | 0,443513247 | 5 | 7,636       | 0,439390487 | 5 |
| 449 | KAVDGYVKPQI  | STAT5A                                                       | JAK2                                          | Y694  | 2,91        | 2,064477335 | 3 | 0,236666667 | 0,33469721  | 3 |
| 450 | IEDNEYTARQG  | c-Src                                                        | c-Src                                         | Y419  | 4,88        | 1,331029677 | 5 | 2,2375      | 2,622693034 | 4 |
| 451 | SNDKVYENVTG  | FAK                                                          | integrin etc / GRB2                           | Y925  | 3,482       | 2,106545988 | 5 | 2           | 2,828427125 | 3 |
| 452 | TEENIYQVPTS  | DAB1                                                         | c-Src                                         | Y220  | 3,574       | 1,951087902 | 5 | 4,92        | 0,423398945 | 3 |
| 453 | ATKSGSTTKNR  | Eukaryotic translation initiation factor 4E                  | Mnk1;PKC                                      | S209  | 0,69        |             | 1 | 1,963333333 | 1,81819202  | 6 |
| 454 | NegCtrl      | Mixed peptides without STY                                   | na                                            |       |             |             |   |             |             |   |
| 455 | SptCtrl      | Used for production/QC                                       | na                                            |       | 1,15        |             | 1 | 3,39        | 3,39        | 2 |
| 456 | PosCtrl      | Mixed kinase substrate peptides                              | na                                            |       | 3,04        | 3,04        | 2 | 5,25        |             | 1 |
| 457 | LNEEWYVSYIT  | SLP 76                                                       | Lck                                           | Y423  | 7,216666667 | 0,298421775 | 6 | 6,728       | 0,703147211 | 5 |
| 458 | RRCKHYVELLV  | Vanilloid receptor like channel 2                            | Lyn                                           | Y253  | 8,518333333 | 0,165067326 | 6 | 8,303333333 | 0,241982552 | 6 |
| 459 | LSNPAYRLLLA  | Discoidin domain receptor                                    | Discoidin_domain_receptor                     | Y513  | 7,69        | 0,355058681 | 3 | 7,6675      | 2,187457142 | 4 |
| 460 | RGQEVYVKKTM  | TEK receptor tyrosine kinase                                 | autophosphorylation / nd                      | Y992  | 9,818       | 0,302483057 | 5 | 9,306666667 | 0,23127665  | 6 |
| 461 | DGENIYIRHSS  | Erythrocyte membrane protein band 41                         | EGFR                                          | Y660  | 6,45        | 0,435660418 | 4 | 5,906666667 | 1,192765228 | 3 |
| 462 | QESDYSQPST   | Oncoprotein Mdm2                                             | c-abl_kinase                                  | Y394  | 2,11        | 2,11        | 2 | 4,68        |             | 1 |
| 463 | WGCGNSLRAL   | Lamin A/C                                                    | PKCalpha                                      | S525  | 1,68        | 2,375878785 | 3 |             |             | 0 |
| 464 | IDPFTYEDPNE  | EphB3                                                        | EphB3                                         | Y614  | 6,825       | 0,360173569 | 4 | 6,55        | 0,991261822 | 4 |
| 465 | GSV EQTPKKPG | Cyclin-dependent kinase inhibitor 1B                         | cyclin_E-CDK2                                 | T187  | 4,33        | 0,99        | 2 | 4,8475      | 2,850520786 | 4 |
| 466 | ICSVNTPREVT  | Protein tyrosine phosphatase nonreceptor 7                   | Erk;ERK2;MAPK14                               | T105  | 5,46        |             | 1 | 0           | 0           | 2 |

|     |              |                                       |                                                                                      |         |             |             |   |             |             |   |
|-----|--------------|---------------------------------------|--------------------------------------------------------------------------------------|---------|-------------|-------------|---|-------------|-------------|---|
| 467 | RSQLETPELTL  | Tumor necrosis factor receptor 2      | nd                                                                                   | T436    | 4,513333333 | 1,116820885 | 3 | 3,416666667 | 2,393077981 | 3 |
| 468 | LPVPEYINQSV  | EGF receptor                          | EGFR                                                                                 | Y1092   | 7,122       | 0,264907531 | 5 | 6,735       | 0,552697928 | 4 |
| 469 | RKRATDDSSST  | Cyclin-dependent kinase inhibitor 1B  | AKT1                                                                                 | T157    | 1,623333333 | 2,295740016 | 3 | 0           | 0           | 2 |
| 470 | TRSKGTLRYMS  | PKR                                   | PKR                                                                                  | T451    | 8,368333333 | 0,16045941  | 6 | 7,743333333 | 0,516225618 | 6 |
| 471 | IDEPSTPYHSM  | Protein phosphatase inhibitor 2       | GSK3beta;NCLK                                                                        | T73     | 5,423333333 | 0,299369708 | 3 | 3,975       | 2,205       | 2 |
| 472 | NELKKKASLF   | Dematin                               | ? / PKA                                                                              | S403    | 8,79        | 0,372066302 | 6 | 8,114       | 0,841893105 | 5 |
| 473 | GDDEASATVSK  | Rhodopsin                             | RK                                                                                   | S334    | 6,64        | 0,590355825 | 5 | 7,023333333 | 0,809334432 | 3 |
| 474 | LQGFNSPGMLS  | Myocyte specific enhancer factor 2A   | ERK5                                                                                 | S355    | 6,31        | 0,165126214 | 3 | 6,722       | 0,253092868 | 5 |
| 475 | AKKEESEESDD  | Ribosomal phosphoprotein large P1     | nd                                                                                   | S101    | 7,335       | 0,223215143 | 4 | 7,366       | 0,503134177 | 5 |
| 476 | GTNPGTPPAST  | SRC1                                  | ERK2                                                                                 | T1179   | 0,915       | 0,915       | 2 | 5,02        |             | 1 |
| 477 | KEEPQTVPEMP  | c-Jun                                 | CK2;DNA-dependent_protein_kinase_catalytic_subunit                                   | T231    | 5,316666667 | 0,555117605 | 3 | 5,385       | 0,285       | 2 |
| 478 | QLLCSTPNGLD  | CDC25C                                | Chk1, Chk2, Cytokine_inducible_kinase_Cell_cycle_checkpoint_kinase;CHK2;MAPK14;MARK3 | S216    | 5,88        | 0,87        | 2 | 5,673333333 | 1,25659151  | 3 |
| 479 | GSKCSTWPLPQ  | Prolactin receptor                    | nd                                                                                   | T415    | 6,98        |             | 1 | 4,17        | 0,67        | 2 |
| 480 | PRSTHTAYIK   | ADAM 12                               | c-Src                                                                                | Y907    | 9,8         | 0,468045582 | 6 | 9,235       | 0,222167354 | 6 |
| 481 | PQPPKSPGFHS  | RAD9                                  | nd                                                                                   | S336    | 4,116       | 2,254458693 | 5 | 5,763333333 | 0,199053315 | 3 |
| 482 | KRRGASDLSE   | Spermidine/spermine N                 | CK2                                                                                  | S146    | 0           |             | 1 | 1,945       | 1,945       | 2 |
| 483 | QGSDVSLTACK  | HLA-A                                 | PKC                                                                                  | S359    | 4,874       | 2,459159206 | 5 | 5,605       | 0,875       | 2 |
| 484 | YPFALSKSSMY  | Kinetochore associated 2              | Never_in_mitosis_gene_A-related_kinase_2                                             | S165    | 6,02        | 0,23        | 2 | 5,853333333 | 0,596899396 | 3 |
| 485 | KSEPSSPDHGS  | Phospholipase C, beta 1               | ERK1                                                                                 | S982    | 6,225       | 0,285       | 2 | 6,023333333 | 0,485958389 | 3 |
| 486 | LGRTQSAPLPQ  | Histone deacetylase 4                 | CaMKIV                                                                               | S467    | 0           |             | 1 |             |             | 0 |
| 487 | RVWYVSNIDGT  | Phosphohexose isomerase               | CK2                                                                                  | S185    | 5,16        | 0,39        | 2 | 3,795       | 0,145       | 2 |
| 488 | TTCVDTRWRYM  | HIR                                   | Protein_kinase_C_delta                                                               | T53     | 6,8475      | 0,755194511 | 4 | 4,953333333 | 1,8694087   | 3 |
| 489 | PSGLWSPAYAS  | NUP210                                | CyclinB;p34cdc2                                                                      | S1881   | 9,408333333 | 0,249694257 | 6 | 9,118333333 | 0,458999516 | 6 |
| 490 | YTRVQSMALPP  | Forkhead box protein L2               | PAK1                                                                                 | S263    | 6,488       | 0,338904116 | 5 | 6,46        | 1,025012195 | 4 |
| 491 | RKAKRSLAPRF  | PKR                                   | PKR                                                                                  | S242    | 8,568333333 | 0,458236353 | 6 | 8,29        | 1,276698868 | 5 |
| 492 | SLLRLSLYNNC  | MHC class II transactivator           | Protein_kinase_cAMP-dependent_catalytic_alpha                                        | S1050   | 4,328       | 2,302515147 | 5 | 5,986666667 | 0,48230926  | 3 |
| 493 | SASQLSAEEEE  | HOX B6                                | CK2                                                                                  | S214    | 7,8425      | 0,335289054 | 4 | 7,298       | 0,772978654 | 5 |
| 494 | ILRKVSGHPNI  | Phosphorylase kinase muscle gamma-1   | Phosphorylase_kinase_muscle_gamma-1                                                  | S82     | 6,745       | 0,055       | 2 | 7,343333333 | 0,281937739 | 3 |
| 495 | VLNFAFSQAPST | Serum response factor                 | DNA-dependent_protein_kinase_catalytic_subunit                                       | S435    | 6,09        | 0,352798337 | 3 | 6,395       | 0,295       | 2 |
| 496 | NNEVGSMMKIQS | Crystallin, beta A3                   | nd                                                                                   | S160    | 7,5925      | 1,494813952 | 4 | 6,543333333 | 0,210765799 | 3 |
| 497 | LERQLSLEQEV  | Arachidonate 5 lipoxygenase           | MAPKAPK2 / MAPK2                                                                     | S271    | 8,493333333 | 0,32749894  | 6 | 7,868       | 0,531315349 | 5 |
| 498 | LIPQQSINEAI  | Glutamate receptor ionotropic, AMPA 1 | PKC;CAMKII                                                                           | S849    | 7,528333333 | 0,693912018 | 6 | 7,4675      | 0,561087114 | 4 |
| 499 | RDKEVSDDEAE  | HSP 90A                               | CK2alpha_1                                                                           | S231    | 7,84        | 0,368465286 | 6 | 6,9925      | 1,073274778 | 4 |
| 500 | GARRSSWRVIS  | 14-3-3-Eta                            | SDK1 is proteolytic fragment of PKC delta                                            | S59;S60 | 9,636666667 | 0,164485731 | 6 | 8,921666667 | 0,446781702 | 6 |
| 501 | VSSAASVYAGA  | Keratin 18                            | p34cdc2                                                                              | S33     | 7,28        | 0,638592202 | 5 | 6,77        | 1,220013661 | 6 |
| 502 | LQRYSSDPTGA  | EGF receptor                          | Calcium/Calmodulin_dependent_protein_kinase_II_gamma                                 | S1071   | 6,005       | 0,856081188 | 4 | 6,225       | 0,492163591 | 4 |
| 503 | QAKVGSLDNVG  | Microtubule associated protein 4      | MARK                                                                                 | S1073   | 4,636666667 | 0,773491363 | 3 | 6,53        | 0,68        | 2 |
| 504 | KTKFASDDEHD  | Autoantigen La                        | nd                                                                                   | S366    | 8,645       | 0,376552343 | 6 | 8,0625      | 0,439623418 | 4 |
| 505 | PLVQRGSANGL  | Beta-adrenergic receptor kinase1      | PKA                                                                                  | S685    | 6,823333333 | 0,720940743 | 3 | 7,2875      | 0,728023866 | 4 |
| 506 | RPRVTSGGVSE  | Cell cycle checkpoint kinase I        | ATR                                                                                  | S280    | 6,855       | 0,604586636 | 4 | 7,03        | 0,466958242 | 4 |
| 507 | LYRSPSPENL   | CDC25C                                | cdc2-cyclin_B_kinase                                                                 | T48     | 6,195       | 0,485       | 2 | 6,156       | 0,779297119 | 5 |
| 508 | NIVLLSAEKK   | CD20                                  | CK2                                                                                  | S231    | 8,573333333 | 0,704099109 | 6 | 8,19        | 0,456990153 | 5 |
| 509 | ETKKGKSFEEIA | Solute carrier family,member 2        | PKA                                                                                  | S491    | 9,261666667 | 0,245249306 | 6 | 8,615       | 0,512404463 | 6 |
| 510 | GTLRTSISVER  | Bradykinin receptor 2                 | PKC                                                                                  | S373    | 8,705       | 0,269675731 | 6 | 7,806       | 0,660502839 | 5 |
| 511 | LEKRASGQAFE  | Stathmin 1                            | PKA                                                                                  | S16     | 7,074       | 0,536492311 | 5 | 5,95        | 1,14166545  | 3 |
| 512 | PIDMESQERIK  | c-Jun                                 | c-Abi;JNK                                                                            | Y170    | 7,17        | 1,158166655 | 4 | 7,63        |             | 1 |
| 513 | VAYHPYPEDYG  | IRS 2                                 | Insulin_receptor                                                                     | y629    | 8,321666667 | 0,213183541 | 6 | 8,345       | 0,581857657 | 6 |
| 514 | AEGSAYEEVPT  | Phospholipase C, gamma1               | FGFR1                                                                                | Y472    | 4,9         | 2,877611857 | 4 | 6,48        | 0,415331193 | 4 |
| 515 | KEVSKYSIQQR  | PDGF receptor, alpha                  | PDGFRalpha to PI3K                                                                   | Y754    | 5,605       | 0,835       | 2 | 7,01        | 0,567230112 | 4 |
| 516 | EEPSIYESVRV  | DAPP1                                 | Lck;PI3-kinase                                                                       | Y139    | 7,016666667 | 0,371513421 | 3 | 6,535       | 0,245       | 2 |
| 517 | LGQRRIYQIQS  | DYRK1B                                | DYRK1B                                                                               | Y271    | 7,97        | 0,744222189 | 3 | 7,523333333 | 0,30619529  | 3 |
| 518 | NegCtrl      | Mixed peptides without STY            | na                                                                                   |         |             |             |   |             |             |   |

|     |              |                                              |                                                                     |       |             |             |   |             |             |   |
|-----|--------------|----------------------------------------------|---------------------------------------------------------------------|-------|-------------|-------------|---|-------------|-------------|---|
| 519 | SptCtrl      | Used for production/QC                       | na                                                                  |       | 7,328333333 | 0,321217303 | 6 | 8,325       | 0,24074537  | 6 |
| 520 | PosCtrl      | Mixed kinase substrate peptides              | na                                                                  |       | 3,245       | 3,245       | 2 | 1,163333333 | 1,645201778 | 3 |
| 521 | PDEILYVNMDE  | AXL receptor tyrosine kinase                 | auto                                                                | Y821  | 7,42        | 1,066239498 | 3 | 6,61        | 0,59        | 2 |
| 522 | NVVPLYDLLLE  | Estrogen receptor, alpha                     | c-Src;Lck                                                           | SY537 | 9,363333333 | 0,60895174  | 6 | 9,433333333 | 0,221860817 | 6 |
| 523 | SDDVRYVNAFK  | VEGF receptor 1                              | VEGF_receptor_1                                                     | Y1213 | 7,708333333 | 0,501179165 | 6 | 8,26        | 0,447034674 | 5 |
| 524 | EPAHAYAQPQT  | CrkL                                         | BCR                                                                 | Y207  | 6,77        | 0,671912693 | 3 | 0           |             | 1 |
| 525 | SSLKAYGNGYS  | Beta-2-adrenergic receptor                   | Insulin_receptor                                                    | Y350  | 5,19        | 0,03        | 2 | 6,7225      | 0,420260336 | 4 |
| 526 | NKPTVYGVSPN  | ABL                                          | nd                                                                  | Y245  | 1,785       | 1,785       | 2 | 2,842       | 2,44157654  | 5 |
| 527 | RNPGFYVEANP  | Phospholipase C, gamma1                      | PKA;PKC                                                             | Y783  | 6,376666667 | 0,181169043 | 3 | 7,485       | 0,415301096 | 4 |
| 528 | FMMPYVVTTRY  | JNK1                                         | MAP2K4                                                              | Y223  | 9,214       | 0,401427453 | 5 | 9,088333333 | 0,25215185  | 6 |
| 529 | SAWPGTLRSGM  | HSP22                                        | ERK1                                                                | T87   | 4,08        | 2,452305038 | 4 | 2,376666667 | 3,361114233 | 3 |
| 530 | PIRVYTHEVVT  | CDC2                                         | Tita: PK161 WEE_1_tyrosine_kinase                                   | Y15   | 0           | 0           | 2 | 4,726       | 2,659139711 | 5 |
| 531 | SSPPGTPSPAD  | CCAAT/Enhancer binding protein, beta         | CaMKII                                                              | S325  | 6,89        |             | 1 | 7,008       | 0,924497701 | 5 |
| 532 | GSVLSTACGTP  | CAM kinase 1                                 | Calcium-calmodulin_dependent_protein_kinase_I_kinase                | T177  | 5,76        |             | 1 |             |             | 0 |
| 533 | RRRRPTPAMLF  | Protein phosphatase 1, regulatory subunit 1B | PKA                                                                 | T34   | 7,165       | 0,462466215 | 4 | 7,255       | 0,245       | 2 |
| 534 | FESIESYDSCD  | C ets 1 protein                              | CaMK2                                                               | S257  | 7,393333333 | 0,2153808   | 6 | 7,802       | 0,63857341  | 5 |
| 535 | EPLPVTPTRDV  | PAK1                                         | CDK5                                                                | T212  | 0           | 0           | 3 | 2,545       | 2,545       | 2 |
| 536 | GKLFYTFCGTI  | PAS kinase                                   | PAS_kinase                                                          | T1161 | 8,1         | 0,233380948 | 6 | 8,215       | 0,313089444 | 6 |
| 537 | IHMVYSKRSGK  | Small nuclear ribonucleoprotein 70 kD        | nd                                                                  | S137  | 9,955       | 0,430996906 | 6 | 10,27166667 | 0,440280845 | 6 |
| 538 | DSQPESQVLED  | Tumor protein p53 binding protein 1          | ATM                                                                 | S29   | 5,866666667 | 0,625157758 | 3 | 6,993333333 | 0,103387083 | 3 |
| 539 | CEEEFDSEEE   | Histone deacetylase 1                        | CK2                                                                 | S421  | 7,463333333 | 0,349555273 | 6 | 8,0725      | 0,480019531 | 4 |
| 540 | KAARKSAPSTG  | H3 histone, family 3A                        | nd                                                                  | S10   | 5,895       | 0,475       | 2 | 6,91        | 0,71        | 2 |
| 541 | QQREKTRWLNS  | Adducin 1                                    | Rho-kinase                                                          | T445  | 5,665       | 0,735       | 2 | 6,845       | 0,105       | 2 |
| 542 | PTAAGTPNKET  | CALDESMON 1                                  | CDC2_Kinase                                                         | S759  | 2,935       | 2,935       | 2 | 0           |             | 1 |
| 543 | RDKYKTLRQIR  | Moesin                                       | Rho-Kinase                                                          | T564  | 7,22        | 0,828299463 | 5 | 8,04        | 0,366878727 | 5 |
| 544 | NSIAKTYVGTN  | MAP2K5                                       | nd                                                                  | T315  | 3,2         | 2,264862027 | 3 | 3,9525      | 2,681057394 | 4 |
| 545 | KETNESPWRSD  | Glucocorticoid receptor                      | nd                                                                  | S211  | 7,0725      | 0,929041845 | 4 | 6,8425      | 1,105540026 | 4 |
| 546 | LARETSVDPDM  | Sepiapterin reductase                        | Ca2+/calmodulin-dependent_protein_kinase_II                         | S213  | 6,9625      | 0,898703928 | 4 | 6,543333333 | 0,776759651 | 3 |
| 547 | CDERTSLMSAE  | Presenilin 2                                 | CK1;CK2                                                             | S19   | 5,53        |             | 1 | 5,38        |             | 1 |
| 548 | IAVRKS RDKAK | CCAAT/Enhancer binding protein, beta         | ERK2                                                                | T235  | 9,186       | 0,48384295  | 5 | 8,66        | 0,364142829 | 4 |
| 549 | DDRHDSGLDSM  | I-Kappa-B-alpha                              | nd                                                                  | S32   | 4,26        |             | 1 |             |             | 0 |
| 550 | RLLDSSQIVII  | E2F transcription factor 1                   | ATM;ATR                                                             | S31   | 6,156666667 | 1,049962962 | 3 | 7,2275      | 0,704818239 | 4 |
| 551 | SIYTRSVIDPV  | PAK2                                         | PAK2                                                                | S197  | 7,015       | 0,996155108 | 4 | 6,79        | 0,32        | 2 |
| 552 | ASGYISSLEYP  | Complement component 1, subcomponent r       | CK2                                                                 | S206  | 8,858333333 | 0,311684491 | 6 | 9,286666667 | 0,307119231 | 6 |
| 553 | VEPPLSQETFS  | p53                                          | DNA-dependent_protein_kinase_catalytic_subunit_Camp2_208900_ATR     | S15   | 7,946666667 | 0,346538438 | 3 | 7,962       | 0,406664481 | 5 |
| 554 | LKRSHSDSLDH  | CDC 25A                                      | CDC2;PIM1                                                           | S115  | 7,013333333 | 0,151070256 | 3 | 7,305       | 0,744686735 | 6 |
| 555 | ATTGVSQETSE  | Glucocorticoid receptor                      | DNA-dependent_protein_kinase_catalytic_subunit                      | S508  | 3,648333333 | 2,596083054 | 6 | 6,073333333 | 0,322937903 | 3 |
| 556 | LMDNAYFCEAD  | Growth hormone receptor                      | nd                                                                  | Y534  | 7,343333333 | 0,180431581 | 6 | 7,826       | 0,325367485 | 5 |
| 557 | KRRQTSMTDFY  | Cyclin-dependent kinase inhibitor 1A         | AKT1                                                                | S146  | 7,782       | 0,568380154 | 5 | 7,386       | 0,313853469 | 5 |
| 558 | GGADDSAEEGD  | Heterogeneous nuclear ribonucleoprotein C    | CK2                                                                 | S260  | 8,206666667 | 0,081377037 | 6 | 7,828333333 | 0,407979438 | 6 |
| 559 | LKRSLSEMEIG  | Serum response factor                        | Potassium_voltage_gated_channel_subfamily_A_member_2_pp90rskCaMKII_ | S103  | 7,113333333 | 0,615241597 | 6 | 7,85        | 0,456333212 | 5 |
| 560 | PGRPLSSYGMD  | MEK1                                         | PAK1                                                                | S298  | 6,936       | 0,746527963 | 5 | 6,833333333 | 1,269575607 | 3 |
| 561 | LSYLQSPITTS  | Dual specificity phosphatase 1               | ERK2                                                                | S359  | 7,9775      | 0,386417844 | 4 | 7,853333333 | 0,351220096 | 3 |
| 562 | INRSASEPSLH  | RAF1                                         | PKA;RAF1;AMPK                                                       | S621  | 6,36        | 0,591819229 | 4 | 6,35        | 0,50039984  | 3 |
| 563 | DFEGFSYVNPQ  | Protein kinase C alpha                       | PKCalpha                                                            | S657  | 9,796666667 | 0,609061208 | 6 | 9,866       | 0,360643869 | 5 |
| 564 | GDRTSTFCGTP  | PKN                                          | 3-Phosphoinositide_dependent_protein_kinase_1                       | T774  | 1,195       | 1,195       | 2 | 2,66        | 2,66        | 2 |
| 565 | GVERSSPSKCP  | BRCA1                                        | CDK2                                                                | S1497 |             |             | 0 | 7,37        | 0,465403051 | 3 |
| 566 | DVHMVSDSDGD  | FAS associated factor 1                      | CK2beta                                                             | S289  | 6,954       | 0,263256529 | 5 | 7,335       | 0,215       | 2 |
| 567 | ALTEDSTQTSD  | Formyl peptide receptor 1                    | Beta-adrenergic_receptor_kinase1                                    | S328  | 4,6225      | 2,595490079 | 4 | 6,565       | 0,725       | 2 |
| 568 | RRRMASMQRTG  | E1A binding protein p300                     | AKT;p70S6_kinase;pp90Rsk                                            | S1834 | 7,336666667 | 0,306521705 | 6 | 7,44        | 0,750919436 | 5 |
| 569 | SRKRLSQDAYR  | p47-phox                                     | PKCalpha;PKCbetaII;PKCdelta                                         | S320  | 9,125       | 0,273358739 | 6 | 9,293333333 | 0,315893794 | 6 |
| 570 | GEKLHSDSGIS  | Nerve growth factor receptor                 | PKA                                                                 | S303  | 6,943333333 | 0,3044485   | 3 | 7,036       | 0,396716523 | 5 |

|     |              |                                                                |                                           |         |             |             |   |             |             |   |
|-----|--------------|----------------------------------------------------------------|-------------------------------------------|---------|-------------|-------------|---|-------------|-------------|---|
| 571 | EHRKSSKPIIME | Transcription factor HES-1                                     | PKC                                       | S38     | 5,235       | 0,765       | 2 | 4,97        | 1,047067333 | 4 |
| 572 | GEFLRTSCGSP  | AMPK alpha 2                                                   | AMPKK                                     | T174    | 6,95        | 0,01        | 2 | 3,66        | 2,618752884 | 3 |
| 573 | PTPPLSPSRRS  | c-Myc                                                          | CK2;GSK                                   | T58     | 9,05        | 0,212524508 | 6 | 8,96        | 0,256748905 | 5 |
| 574 | QLRRPSPDRELS | NFKB3                                                          | PKA                                       | S263    | 6,1025      | 0,841200779 | 4 | 7,47        |             | 1 |
| 575 | LTNRHSLPFSL  | CBL                                                            | INSR                                      | Y371    | 7,796       | 0,347136861 | 5 | 8,078       | 0,506770165 | 5 |
| 576 | VEDNRSQVETD  | AQP4                                                           | CK2                                       | S285    | 6,5525      | 0,640912436 | 4 | 7,46        | 0,125698051 | 3 |
| 577 | DDEDCYGNVDN  | 3-Phosphoinositide dependent protein kinase 1                  | c-Src                                     | Y373    | 6,2475      | 1,079615093 | 4 | 7,331666667 | 0,875336443 | 6 |
| 578 | DVLKFDYDNTV  | PAK2                                                           | Lck, Fyn, Hck / Src                       | Y130    | 6,96        | 0,408493166 | 3 | 6,945       | 0,846241691 | 4 |
| 579 | EADGVYAASGG  | FES tyrosine kinase                                            | FES_tyrosine_kinase                       | Y713    | 0           | 0           | 2 | 6,57        | 0,71        | 2 |
| 580 | FLFNMYLTRER  | Homeo box A10                                                  | nd                                        | Y343    | 0           | 0           | 2 | 4,4475      | 0,429789193 | 4 |
| 581 | RPDHIYDEPEG  | DOK2                                                           | Abl / nd                                  | Y345    | 4,4275      | 2,283094118 | 4 | 3,206       | 2,647728083 | 5 |
| 582 | NegCtrl      | Mixed peptides without STY                                     | na                                        |         | 6,931666667 | 0,832934905 | 6 | 6,746       | 0,786907873 | 5 |
| 583 | SptCtrl      | Used for production/QC                                         | na                                        |         | 0           |             | 1 | 2,895       | 2,245       | 2 |
| 584 | PosCtrl      | Mixed kinase substrate peptides                                | na                                        |         |             |             | 0 | 5,56        |             | 1 |
| 585 | EDENLYEGLNL  | CD79A                                                          | nd                                        | Y188    | 7,228333333 | 0,473019262 | 6 | 7,924       | 0,347942524 | 5 |
| 586 | RESSVYDISEH  | NR2B                                                           | CaMKII                                    | S383    | 7,5025      | 0,672880933 | 4 | 8,2975      | 0,279676152 | 4 |
| 587 | CERRFSRSDQL  | WT1                                                            | PKA                                       | S365    | 5,04        | 0,14        | 2 | 6,51        |             | 1 |
| 588 | TDEDIYLLGKA  | Sialyltransferase 1                                            | nd                                        | Y391    | 7,17        | 0,292438028 | 5 | 6,956666667 | 0,803713603 | 3 |
| 589 | ASKRSYQFWDT  | N-Myristoyl transferase 1                                      | Lyn                                       | Y117    | 8,284       | 0,384686886 | 5 | 7,594       | 0,532413373 | 5 |
| 590 | EVERTYLKTKS  | Glutamate receptor ionotropic, N-methyl D-aspartate subunit 2A | Src                                       | Y1105   | 9,951666667 | 0,354608548 | 6 | 9,32        | 0,390170903 | 6 |
| 591 | TGSVDYLALDF  | GAB2                                                           | ZAP70                                     | Y614    | 7,61        | 0,17907168  | 3 | 7,42        | 0,297097066 | 6 |
| 592 | YKVILYELENF  | Crystallin beta B3                                             | nd                                        | Y29     | 6,663333333 | 0,430219582 | 3 | 6,2875      | 1,362761443 | 4 |
| 593 | VDAAVTPEERH  | Amyloid beta A4 protein                                        | GSK3beta                                  | T743    | 4,0475      | 1,939527971 | 4 | 6,62        | 2,98        | 2 |
| 594 | KDDKLTLPKIGF | Ezrin                                                          | CDK5                                      | T234    | 6,841666667 | 0,438650076 | 6 | 8,05        | 0,382709638 | 3 |
| 595 | DNTPHTPTPFK  | B-Myb                                                          | CDK2                                      | T518    | 5,91        | 0,438482231 | 3 | 6,886       | 0,790913396 | 5 |
| 596 | PDHQYYNDFFPG | Shc                                                            | SYK;c-Src                                 | Y350    | 5,49        | 0,43481797  | 3 | 4,963333333 | 2,200665656 | 3 |
| 597 | IVADQTPTPTR  | Activating transcription factor 2                              | JNK2;MAPK14                               | T51     | 0,85        | 1,7         | 5 | 2,22        | 2,269988987 | 4 |
| 598 | GETRFTDTRKD  | Eukaryotic translation elongation factor 2                     | eEF2_kinase                               | T57     | 0           |             | 0 | 3,03        | 3,03        | 2 |
| 599 | LHRDKTPLHQK  | B-Myb                                                          | CDK2                                      | T494    | 4,825       | 0,405       | 2 | 2,84        | 2,84        | 2 |
| 600 | TTSQLYDAVPI  | 3-Phosphoinositide dependent protein kinase 1                  | c-Src                                     | Y9      | 6,526666667 | 0,207578633 | 3 | 6,703333333 | 0,322937903 | 3 |
| 601 | LPPGASPQRSR  | NFAT1                                                          | nd                                        | S268    | 7,04        | 2,6468094   | 3 | 7,416       | 0,606089102 | 5 |
| 602 | DDGEFSDSDGA  | eIF-2B epsilon                                                 | CK1                                       | S466    | 6,226666667 | 0,671830005 | 3 | 7,64        | 0,336080348 | 4 |
| 603 | HKGHLSEGLVT  | MAPK6                                                          | MAPK6                                     | Y189    | 7,17        | 0,954840301 | 5 | 7,93        | 0,308274769 | 6 |
| 604 | QEQESSGEEDS  | Protein phosphatase inhibitor 2                                | CK2                                       | S121    | 6,695       | 0,418897362 | 4 | 6,92        | 0,392513269 | 3 |
| 605 | RLRPRTKVKKS  | Neutrophil cytosolic factor 4 40kDa                            | PKC                                       | T154    | 8,973333333 | 0,263037809 | 6 | 8,588333333 | 0,278891656 | 6 |
| 606 | MEEGQTQKGC   | Glycoprotein M6A                                               | PKCalpha                                  | T10     | 4,73        |             | 1 | 4,97        | 0,853268227 | 3 |
| 607 | QSKRSTMVGT   | PAK3                                                           | Pyruvate_dehydrogenase_kinase_isoenzyme_1 | T423    | 7,3525      | 0,742205329 | 4 | 7,315       | 0,288574081 | 4 |
| 608 | QERRKYLKHRL  | STAT2                                                          | JAK1                                      | Y690    | 7,76        | 0,472821319 | 5 | 7,1025      | 0,328814157 | 4 |
| 609 | RFIIGSVSEDN  | Acetyl-CoA carboxylase alpha                                   | cdpk                                      | S23;S62 | 6,773333333 | 0,862567228 | 3 | 7,262       | 0,688139521 | 5 |
| 610 | DPWGGSPAKPS  | Epsin 1                                                        | CDC2                                      | S357    | 3,25        | 3,25        | 2 | 6,85        | 0,536982309 | 4 |
| 611 | LDSRLSPAGL   | STAT5A                                                         | IL-2                                      | S780    | 2,54        | 2,54        | 2 | 1,536666667 | 2,173174841 | 3 |
| 612 | MASGVTVNDE   | Cofilin 2                                                      | LIMK1                                     | S3      | 4,853333333 | 1,24756652  | 3 | 3,413333333 | 2,420266285 | 3 |
| 613 | RGKKKSGCLVL  | RhoA                                                           | PKA                                       | S188    | 8,8         | 0,441663522 | 6 | 8,405       | 0,357246414 | 6 |
| 614 | MASGVAVSDG   | Cofilin 1                                                      | LIMK1;TESK1;TESK2;LIMK2                   | S3      | 5,703333333 | 0,718578844 | 3 | 4,62        |             | 1 |
| 615 | YQQRNSPGVPT  | Golgin 95                                                      | CDC2;PP2A                                 | S25     | 4,43        |             | 1 | 1,066666667 | 1,508494467 | 3 |
| 616 | DEDACSDTEAT  | Protein phosphatase inhibitor 2                                | CK2                                       | S87     | 5,9475      | 0,321743298 | 4 | 5,536666667 | 0,960185167 | 3 |
| 617 | RAREASGAPTS  | Androgen receptor                                              | AKT1                                      | S213    | 2,275       | 1,975       | 2 | 4,985       | 0,025       | 2 |
| 618 | KLFSSSVSEGF  | Kell blood group protein                                       | CK2                                       | S383    | 7,713333333 | 0,431225643 | 6 | 8,445       | 0,224925914 | 6 |
| 619 | GLMQQKQKSF   | SHP2                                                           | PKCalpha;PKCbeta1;PKCbeta2;PKCeta         | S591    | 8,711666667 | 0,164966327 | 6 | 8,504       | 0,076052613 | 5 |
| 620 | LSTEGSDQEKE  | Peptidylglycine alpha amidating monooxygenase                  | P-CIP2                                    | S947    | 7,576       | 0,137200583 | 5 | 8,083333333 | 0,16569718  | 6 |
| 621 | RRRFSSLHFMV  | Caspase 9                                                      | ERK1;ERK2;MEK1;MAP2K2                     | T125    | 7,01        | 0,6303967   | 3 | 7,148       | 0,476210038 | 5 |
| 622 | PLTPESPNDPK  | PPAR gamma coactivator-1                                       | MAPK14                                    | S266    |             |             | 0 | 4,236666667 | 1,418951099 | 3 |



|     |              |                                                 |                                                                                    |       |             |             |   |             |             |   |
|-----|--------------|-------------------------------------------------|------------------------------------------------------------------------------------|-------|-------------|-------------|---|-------------|-------------|---|
| 623 | RRRAISETEEN  | Oncoprotein Mdm2                                | AKT1                                                                               | S166  | 6,1         |             | 1 |             |             | 0 |
| 624 | IIGEKSFRRSV  | Protein kinase C, mu                            | PKCmu                                                                              | S738  | 7,86        | 0,288530761 | 4 | 7,0925      | 0,503754653 | 4 |
| 625 | ALRRESQGS LN | Regulator of G protein signaling 14             | PKA                                                                                | S260  | 4,104       | 2,28807867  | 5 | 0           | 0           | 2 |
| 626 | FRRQLSEPCNS  | ETS variant gene 1                              | PKA                                                                                | S191  | 6,68        | 1,17940663  | 5 | 7,92        | 0,285744641 | 4 |
| 627 | RKKRISVKKKQ  | Cytohesin 2                                     | PKC                                                                                | S392  | 11,215      | 0,606458298 | 6 | 12,02166667 | 0,29700823  | 6 |
| 628 | ENNVLSPLPSQ  | p53                                             | GSK3beta;Tumor_endothelial_marker_8_DNA-dependent_protein_kinase_catalytic_subunit | S33   | 2,715       | 2,739785576 | 4 | 5,27        | 0,24        | 2 |
| 629 | REKSSSSSED   | B-Raf                                           | PKA                                                                                | S428  | 6,07        |             | 1 | 6,563333333 | 0,438583579 | 3 |
| 630 | HERYSSPTAGS  | Retinoblastoma like 1                           | CDK4                                                                               | S650  | 6,39        | 0,87044816  | 5 | 6,844       | 0,593619407 | 5 |
| 631 | FWSSLSPVAPL  | ELK3                                            | JNK                                                                                | S357  | 7,486666667 | 0,323556624 | 3 | 7,4375      | 0,554137844 | 4 |
| 632 | RRGSDSSEDIY  | Protein phosphatase 1, regulatory subunit 3A    | Ribosomal_S6_kinase_1                                                              | S48   | 10,71666667 | 0,350412455 | 6 | 10,55       | 0,22353225  | 6 |
| 633 | SRRRPSYRKIL  | cAMP response element-binding protein 1         | PKA;MAPK;CaMK;RSK2                                                                 | S133  | 9,693333333 | 0,223507395 | 6 | 9,341666667 | 0,424437536 | 6 |
| 634 | KKKKPSRLKGD  | APC                                             | PKA                                                                                | S2054 | 9,563333333 | 0,473661858 | 6 | 8,916666667 | 0,38663793  | 6 |
| 635 | LKPGSSHRKTK  | Bruton's tyrosine kinase                        | PKCbeta                                                                            | S180  | 9,771666667 | 0,355734764 | 6 | 9,456666667 | 0,395502493 | 6 |
| 636 | PCLPQYPHING  | Fibroblast growth factor receptor 2             | Fibroblast_growth_factor_2                                                         | Y813  | 3,832       | 3,182598938 | 5 | 6,12        | 0,913272504 | 3 |
| 637 | SRRRESFLYRS  | cAMP-specific 3',5'-cyclic phosphodiesterase 4B | PKA                                                                                | S133  | 6,62        |             | 1 |             |             | 0 |
| 638 | KARKSSCQLL   | Ras related protein Rap 1B                      | PKA                                                                                | S179  | 8,861666667 | 0,335082908 | 6 | 8,396       | 0,42715805  | 5 |
| 639 | GLQMGSNRGAS  | Transgelin                                      | PKC                                                                                | S181  | 5,934       | 0,715055243 | 5 | 5,985       | 1,008476574 | 4 |
| 640 | RMVQLSPPALA  | T cell acute lymphocytic leukemia 1             | ERK1                                                                               | S122  | 2,575       | 2,61205379  | 4 | 5,86        | 1           | 2 |
| 641 | FEEDDYESPND  | SLP 76                                          | ZAP70_Protein_tyrosine_kinase_TXK                                                  | Y113  | 7,43        | 0,699857128 | 3 | 6,913333333 | 0,726651376 | 3 |
| 642 | VSFNPYEPELA  | SYK                                             | SYK                                                                                | Y323  | 2,61        | 2,61        | 2 | 5,86        |             | 1 |
| 643 | KEVKRYQCTFE  | Metal regulatory transcription factor 1         | Tyrosine_kinase                                                                    | Y140  | 5,32        |             | 1 | 5,16        |             | 1 |
| 644 | KMAEAYSEIGM  | T-cell antigen receptor, zeta                   | lck / nd                                                                           | Y123  | 4,69        | 0,71        | 2 | 6,37        |             | 1 |
| 645 | PGLDEYNPFSD  | SCAMP1                                          | EGFR                                                                               | Y37   | 7,636666667 | 0,260810702 | 3 | 6,688       | 0,521244664 | 5 |
| 646 | NegCtrl      | Mixed peptides without STY                      | na                                                                                 |       |             |             |   |             |             |   |
| 647 | SptCtrl      | Used for production/QC                          | na                                                                                 |       | 8,981666667 | 0,171212993 | 6 | 8,693333333 | 0,383304347 | 6 |
| 648 | PosCtrl      | Mixed kinase substrate peptides                 | na                                                                                 |       | 1,493333333 | 2,111892253 | 3 | 5,3         | 1,692911693 | 4 |
| 649 | ITEEDYQALRT  | Clathrin, heavy polypeptide                     | Src_kinase                                                                         | Y1477 | 5,242       | 2,637062002 | 5 | 6,3025      | 0,83714918  | 4 |
| 650 | KDGWVYYANHT  | VW Domain containing oxidoreductase             | JNK1                                                                               | Y33   | 8,42        | 0,128840987 | 6 | 7,93        | 0,400915619 | 6 |
| 651 | APEDLYKDFLT  | VEGF receptor 2                                 | VEGF_receptor_2                                                                    | Y996  | 7,256       | 0,499143266 | 5 | 7,301666667 | 0,393760361 | 6 |
| 652 | SRLSAYPALEG  | CD5                                             | Lck;Fyn                                                                            | Y487  | 2,2125      | 2,249548566 | 4 | 5,28        |             | 1 |
| 653 | HAQDTYLVLDK  | Erythropoietin receptor                         | JAK2                                                                               | Y368  | 6,98        | 0,345639504 | 3 | 6,99        | 0,641612552 | 3 |
| 654 | EDLSAYASISF  | IRS 1                                           | Phosphatidylinositol_3-kinase_catalytic_subunit_alpha                              | Y1229 | 6,82        | 0,252269697 | 5 | 6,8675      | 0,301278526 | 4 |
| 655 | NQLFLYDTHQN  | Phospholipase C, gamma 2                        | Bruton's_tyrosine_kinase                                                           | Y1217 | 5,45        |             | 1 | 5,776666667 | 0,756585899 | 3 |
| 656 | SADSGYIPLP   | PDGF receptor, alpha                            | PDGFRalpha                                                                         | Y1018 | 5,32        | 0,33        | 2 | 6,445       | 0,115       | 2 |
| 657 | VLRPETPRPVD  | Caspase 9                                       | AKT1                                                                               | S196  | 0,695       | 0,695       | 2 | 1,29        | 1,29        | 2 |
| 658 | DATGDTPGAED  | MAPK8 interacting protein 1                     | JNK1                                                                               | T103  |             |             | 0 | 6,12        | 0,861510302 | 5 |
| 659 | IGEGTYGVVYK  | CDC2                                            | Tita: WEE/MYT PK161                                                                | T161  | 8,078333333 | 0,460702965 | 6 | 7,74        | 0,407144528 | 6 |
| 660 | RNEGVYTAIAV  | PSTPIP1                                         | ABL                                                                                | Y345  | 6,135       | 0,165       | 2 | 6,65        | 0,398580816 | 3 |
| 661 | RTAPYTPNLPH  | SMAD4                                           | ERK2                                                                               | T277  | 2,435       | 2,435       | 2 | 5,27        |             | 1 |
| 662 | AVHPLTPLITY  | Lymphoid enhancer-binding factor1               | Nemo-like_kinase                                                                   | T155  | 6,216666667 | 0,526392334 | 3 | 6,9725      | 0,149394612 | 4 |
| 663 | NNAIETVSINN  | Dopamine receptor D1                            | nd                                                                                 | T360  | 3,57        | 1,513737097 | 3 | 4,42        | 0,15        | 2 |
| 664 | GVDGDYEDAEL  | BCR                                             | FES_kinase                                                                         | Y246  | 8,075       | 0,082006097 | 4 | 7,946       | 0,452574856 | 5 |
| 665 | EKKAYSFCGTV  | Ribosomal S6 kinase 1                           | Pyruvate_dehydrogenase_kinase_isoenzyme_1                                          | S227  | 8,591666667 | 0,286264252 | 6 | 7,881666667 | 0,296277835 | 6 |
| 666 | KGGKYSVKDKE  | L1 cell adhesion molecule                       | p90rsk                                                                             | S1152 | 7,345       | 0,215       | 4 | 7,15        | 0,495008417 | 6 |
| 667 | TWRRGSTAGGC  | Calpain, large polypeptide L1                   | nd                                                                                 | T80   | 6,855       | 0,677292404 | 4 | 5,49        |             | 1 |
| 668 | CQRRHTLPASE  | Aralkylamine N-acetyltransferase                | PKA                                                                                | T31   | 4,4125      | 2,903130853 | 4 | 3,775       | 2,183054053 | 4 |
| 669 | LVEPLTPSGEA  | EGF receptor                                    | ERK1;ERK2                                                                          | T693  | 6,345       | 0,605       | 2 | 6,446666667 | 1,039914526 | 6 |
| 670 | APLLSTPKRER  | Kinesin like 4                                  | Cyclin_B2                                                                          | T463  | 7,96        | 0,492950302 | 5 | 6,84        | 0,481144469 | 4 |
| 671 | DYIPGTETHMA  | NIK                                             | Tpl2                                                                               | T559  | 5,885       | 0,415       | 2 | 0           |             | 1 |
| 672 | PEPGPYAQPSV  | CRK                                             | ABL;EGFR;IGF-I_receptor                                                            | Y221  | 4,555       | 0,185       | 2 | 1,423333333 | 2,012897304 | 3 |
| 673 | QPRCTSLDSAL  | MAP3K8                                          | AKT1                                                                               | S400  | 1,01        | 1,55        | 2 | 0           |             | 1 |
| 674 | DIKSDSILLTS  | p21-activated kinase 7                          | PAK5                                                                               | S573  | 7,07        | 0,096263527 | 3 | 6,89        | 0,46070598  | 4 |

|     |              |                                                       |                                                                                               |       |              |             |   |             |             |   |
|-----|--------------|-------------------------------------------------------|-----------------------------------------------------------------------------------------------|-------|--------------|-------------|---|-------------|-------------|---|
| 675 | EVPRRSGLSAG  | Methyl CpG binding domain protein 3                   | Aurora_kinase_A                                                                               | S24   | 5,943333333  | 0,867192148 | 3 |             |             | 0 |
| 676 | LTRIPSAKKYK  | PEA15                                                 | PKC                                                                                           | S104  | 10,203333333 | 0,180061718 | 6 | 9,523333333 | 0,245877115 | 6 |
| 677 | LKQGASPNVQD  | Cyclin dependent kinase inhibitor 2D                  | nd                                                                                            | S66   | 5,895        | 0,475       | 2 | 2,405       | 2,598090645 | 4 |
| 678 | KTPKDSPGIPP  | Ribosomal protein S6 kinase alpha 3                   | EphB2                                                                                         | S369  | 4,68         |             | 1 | 0           |             | 1 |
| 679 | HGSRHSLASTD  | Low density lipoprotein receptor-related protein 1    | PKA                                                                                           | S4520 | 3,125        | 3,125       | 2 | 4,57        |             | 1 |
| 680 | SPYLSLSPVSNK | HCDH1                                                 | CDK2                                                                                          | S151  | 7,442        | 0,541161713 | 5 | 7,345       | 0,101118742 | 4 |
| 681 | RKRKPSTSDDS  | DNA topoisomerase II alpha                            | CK2                                                                                           | S1469 | 5,993333333  | 0,962023331 | 3 | 4,8425      | 1,433167384 | 4 |
| 682 | QNLMSQSVKETV | Vinculin                                              | PKCalpha                                                                                      | S1101 | 4,59         | 3,461184768 | 3 | 6,035       | 1,557473916 | 4 |
| 683 | LLREASARDRQ  | Vanilloid receptor 1                                  | PKCepsilon                                                                                    | S801  | 2,5425       | 2,547473013 | 4 |             |             | 0 |
| 684 | PSPLPSPTASP  | Amphiphysin                                           | CDK4;CDC3                                                                                     | S272  | 3,35         | 2,386475784 | 3 | 3,965       | 0,675       | 2 |
| 685 | IRSSMSGLHLV  | Acetyl-CoA carboxylase alpha                          | AMPK                                                                                          | S80   | 6,875        | 0,185       | 2 | 6,6225      | 0,632905009 | 4 |
| 686 | ENTFPSPKAIP  | Nude like protein                                     | CDK5/p35                                                                                      | S231  | 3,516666667  | 2,257673335 | 3 | 3,395       | 3,395       | 2 |
| 687 | GERKKTLCGTP  | Polo like kinase                                      | nd                                                                                            | T210  | 3,64         | 2,596613179 | 3 | 0           |             | 1 |
| 688 | YKFPSSPLRIP  | Retinoblastoma 1                                      | CDK4                                                                                          | S795  | 9,306666667  | 0,346201611 | 6 | 8,59        | 0,365695684 | 6 |
| 689 | RSNPPSRKGS   | Connexin 32                                           | PKC;PKA                                                                                       | S233  | 8,393333333  | 0,096896279 | 6 | 7,506666667 | 0,396344407 | 6 |
| 690 | AAKRASRIYNT  | Regulator of G protein signaling 10                   | PKA                                                                                           | S176  | 9,038333333  | 0,220258686 | 6 | 8,445       | 0,317477033 | 6 |
| 691 | PSSRASSRASS  | Connexin 43                                           | nd                                                                                            | S367  | 8,205        | 0,259855729 | 6 | 7,428333333 | 0,504625824 | 6 |
| 692 | KQEVESPTDKS  | c-Myb                                                 | CK2alpha_1                                                                                    | S11   | 2,5725       | 2,575823897 | 4 | 5,8575      | 0,436255372 | 4 |
| 693 | LSRDPSLMVDF  | Fanconi anemia, complementation group A               | AKT1                                                                                          | S1149 | 5            |             | 1 | 4,36        |             | 1 |
| 694 | LRGNSGLGFS   | Synapse associated protein 97                         | CaMKII                                                                                        | S232  | 7,06         | 0,394144644 | 4 | 6,963333333 | 0,263860232 | 3 |
| 695 | RPRNYSVGSRP  | 6-phosphofructo-2-kinase/fructose-2,6-biphosphatase 2 | AKT                                                                                           | S483  | 9,218333333  | 0,13234005  | 6 | 8,583333333 | 0,36385284  | 6 |
| 696 | TKWYRSPRLLL  | MAPK4                                                 | MAPK4                                                                                         | S196  | 6,028        | 0,437419707 | 5 | 6,215       | 0,348532638 | 4 |
| 697 | PAARASKKILL  | Beta-adrenergic receptor kinase1                      | PKC                                                                                           | S29   | 8,561666667  | 0,243681258 | 6 | 8,126       | 0,565423735 | 5 |
| 698 | LERNLSFEIKK  | Protein tyrosine phosphatase, nonreceptor-type, 12    | PKA;PKC                                                                                       | S435  | 8,131666667  | 0,385461484 | 6 | 7,943333333 | 0,208619803 | 6 |
| 699 | LLSELSRRRIR  | eIF2 alpha                                            | PKR;GCN2;Eukaryotic_translation_initiation_factor_2-alpha_kinase_3;dsrRNA-PKC;CK2;HCR;D5L;PKC | S52   | 9,173333333  | 0,149740516 | 6 | 8,37        | 0,443959458 | 6 |
| 700 | GPRLVSNHSLH  | Filamin A                                             | CAMKII                                                                                        | S2523 | 8,313333333  | 0,257466287 | 6 | 8,186666667 | 0,296123098 | 6 |
| 701 | SSDDDDSEEP   | CD45                                                  | CK2alpha1;CK2alpha2                                                                           | S973  | 7,202        | 0,992560326 | 5 | 7,404       | 0,327511832 | 5 |
| 702 | ELEGISPDDELK | Glia maturation factor beta                           | PKA                                                                                           | S53   | 8,968333333  | 0,37262209  | 6 | 8,13        | 0,564304882 | 5 |
| 703 | SSTDRSPYEKV  | Mucin 1 transmembrane                                 | GSK3beta                                                                                      | S1227 | 8,67         | 0,198158186 | 6 | 8,648       | 0,244409492 | 5 |
| 704 | SQSPHSPDSSQ  | CHOP                                                  | CK2alpha_1                                                                                    | S14   | 3,45         | 1,910968341 | 3 | 5,59        |             | 1 |
| 705 | LKSPAYRDLAA  | Regulator of G protein signaling 16                   | EGFR                                                                                          | Y177  | 7,48         |             | 1 | 4,88        |             | 1 |
| 706 | SPQPEYVNPDP  | ErbB2                                                 | ERBB2                                                                                         | Y1139 | 5,445        | 0,025       | 2 | 4,965       | 1,355       | 2 |
| 707 | EEEHVYSFPNK  | Paxillin                                              | FAK                                                                                           | Y118  | 0            |             | 1 | 6,053333333 | 0,173269219 | 3 |
| 708 | INPYHYKRVES  | SMAD5                                                 | nd                                                                                            | Y128  | 6,973333333  | 0,411204194 | 3 | 7,95        | 0,532916504 | 4 |
| 709 | EQETFYEQPPL  | HIP55                                                 | ZAP70                                                                                         | Y345  | 6,32         |             | 1 | 5,606       | 1,189480559 | 5 |
| 710 | NegCtrl      | Mixed peptides without STY                            | na                                                                                            |       |              |             |   |             |             |   |
| 711 | SptCtrl      | Used for production/QC                                | na                                                                                            |       | 5,634        | 1,678661371 | 5 | 5,11        | 0,26        | 2 |
| 712 | PosCtrl      | Mixed kinase substrate peptides                       | na                                                                                            |       | 7,12         |             | 1 | 5,37        |             | 1 |
| 713 | ADDSYYTARSA  | ZAP70                                                 | Lck                                                                                           | Y493  | 4,335        | 0,555       | 2 |             |             | 0 |
| 714 | FSGGLYGLLPP  | NIPP1                                                 | Lyn                                                                                           | Y264  | 5,77         |             | 1 | 5,33        |             | 1 |
| 715 | RGDKGYVPSVF  | STAT4                                                 | IL-12;MAP2K6;STAT4                                                                            | Y693  |              |             | 0 | 5,253333333 | 0,958343478 | 3 |
| 716 | YGHPIVIVQEM  | Ephrin B1                                             | nd                                                                                            | Y329  | 3,43         | 3,43        | 2 | 5,26        | 0,83150466  | 3 |
| 717 | QQQEVYGMMPR  | Spectrin                                              | Csk                                                                                           | Y1176 | 5,376666667  | 0,677757741 | 3 | 6,365       | 0,685       | 2 |
| 718 | PNDVYANWML   | Ret                                                   | Ret                                                                                           | Y1096 | 5,895        | 0,205       | 2 |             |             | 0 |
| 719 | IENPQYFGITN  | TrkB tyrosine kinase                                  | TrkB                                                                                          | Y532  | 5,94         |             | 1 | 6,46        | 0,58        | 2 |
| 720 | QPFVKYATLIS  | Leptin receptor                                       | nd                                                                                            | Y986  | 8,85         | 0,268402683 | 5 | 8,456666667 | 0,857431565 | 6 |
| 721 | SEGLPTPTKMT  | Retinoblastoma 1                                      | CDK2-cyclin_A                                                                                 | T821  | 5,395        | 0,585       | 2 | 6,73        | 0,4         | 2 |
| 722 | MVRTQTESSTP  | 3-Phosphoinositide dependent protein kinase 1         | PDK1                                                                                          | T33   | 1,505        | 1,505       | 2 | 3,47        | 0,81        | 2 |
| 723 | TGDTYTAHAGA  | ABL                                                   | nd                                                                                            | Y412  | 3,1          |             | 1 | 2,735       | 2,735       | 2 |
| 724 | LRLQDYEEKTK  | Ezrin                                                 | EGFR                                                                                          | T353  | 7,881666667  | 0,35913863  | 6 | 7,461666667 | 0,669288594 | 6 |
| 725 | RPRSCTWPLPR  | FKHR                                                  | AKT1                                                                                          | T24   | 6,84         | 0,503467973 | 5 | 6,5175      | 1,323468454 | 4 |
| 726 | PPTGATANRLR  | Casein kinase 1, epsilon                              | CK1epsilon                                                                                    | T407  | 3,56         | 3,56        | 2 | 0,985       | 0,985       | 2 |

|     |              |                                                                     |                                     |       |             |             |   |             |             |   |
|-----|--------------|---------------------------------------------------------------------|-------------------------------------|-------|-------------|-------------|---|-------------|-------------|---|
| 727 | SSTSVTPDVSD  | PTEN                                                                | CK2                                 | T366  | 3,93        |             | 1 | 6,755       | 0,295       | 2 |
| 728 | EEEADSCFGDD  | Cell division cycle 34                                              | CK2                                 | S222  | 6,9475      | 0,628346043 | 4 | 7,375       | 1,152876836 | 4 |
| 729 | KLVQASEELLR  | Nucleoside diphosphate kinase 3                                     | nd                                  | S61   | 7,2075      | 0,412090706 | 4 | 7,78        | 0,423398945 | 6 |
| 730 | FSEITSPSKRS  | ORC1                                                                | CDK2                                | S273  | 7,7         | 0,409243204 | 5 | 7,66        | 0,195703858 | 6 |
| 731 | SLESLSACSM   | Grb10                                                               | Fyn                                 | Y61   | 7,308333333 | 0,622452586 | 6 | 6,9425      | 1,591514609 | 4 |
| 732 | EFTSRTPKDSP  | Ribosomal S6 kinase 1                                               | ERK2                                | T359  | 5,814       | 0,672981426 | 5 | 5,005       | 1,534000761 | 6 |
| 733 | RKMKDTSDEEE  | Calmodulin 1                                                        | Insulin_receptor;EGFR;c-Src;PTK_III | Y100  | 6,35        | 0,255049015 | 4 | 6,625       | 0,425998826 | 4 |
| 734 | ILSGGTPKCCL  | CDC25C                                                              | cdc2-cyclin_B_kinase                | S214  |             |             | 0 | 4,686666667 | 0,348361243 | 3 |
| 735 | SLFDRTPTGEM  | Myosin light chain 1, embryonic muscle/atrial isoform               | nd                                  | T66   |             |             | 0 | 3,335       | 3,335       | 2 |
| 736 | FFVIEYVNGGD  | Protein kinase C, iota type                                         | c-Src                               | Y325  | 8,073333333 | 0,26656248  | 6 | 7,508333333 | 0,751984412 | 6 |
| 737 | GYLVDVAKTM   | MAP2K3                                                              | nd                                  | S223  | 8,335       | 0,164595464 | 6 | 7,996666667 | 0,391223153 | 6 |
| 738 | QKIHISKKWGF  | Ribosomal protein L10                                               | RPL10                               | S168  | 3,365       | 2,123493584 | 4 | 5,068       | 0,758667252 | 5 |
| 739 | KKGARSRLFS   | Guanine nucleotide binding protein, alpha 15 subunit                | PKCalpha                            | S336  | 10,125      | 0,26316978  | 6 | 9,676666667 | 0,237323033 | 6 |
| 740 | LLEDDSDDEED  | Vesicle associated membrane protein 4                               | CK2alpha_1                          | S30   | 9,333333333 | 0,478841194 | 6 | 8,686       | 0,405541613 | 5 |
| 741 | DEQFVSLYGTE  | TBK1                                                                | nd                                  | S172  | 8,388333333 | 0,885709069 | 6 | 7,58        | 1,138639539 | 6 |
| 742 | KTTQMSAAGTY  | MAP3K11                                                             | HPK1                                | S281  | 6,7225      | 0,599723895 | 4 | 7,445       | 0,697871765 | 4 |
| 743 | LHDALSGSGNP  | Galectin 3                                                          | CK1                                 | S12   | 4,93        | 1,579113675 | 3 |             |             | 0 |
| 744 | VPPSSTDRSPY  | Mucin 1 transmembrane                                               | PKCdelta                            | T1224 | 5,626666667 | 0,730540135 | 3 | 6,97        | 0,34        | 2 |
| 745 | SATIVSPPPSS  | E2F transcription factor 1                                          | CDC2                                | S332  | 3,6475      | 2,279817701 | 4 | 2,29        | 2,369367004 | 4 |
| 746 | RSKKNLALSL   | Estrogen receptor, alpha                                            | PAK1                                | S305  | 6,422       | 0,768749634 | 5 | 6,036666667 | 1,295745174 | 3 |
| 747 | HFPQFSYSASS  | AKT1                                                                | AKT                                 | S473  | 8,423333333 | 0,513571373 | 6 | 8,262       | 0,536671222 | 5 |
| 748 | KSFTRSTVDTM  | Complement component 5 receptor 1                                   | nd                                  | S338  | 8,082       | 0,065848311 | 5 | 7,7         | 0,80867175  | 4 |
| 749 | HWQQQSYLDGS  | Beta-catenin                                                        | CK2beta                             | S29   | 6,645       | 0,408523765 | 6 | 5,704       | 1,90561906  | 5 |
| 750 | KDFSSSKRMNT  | Syntaxin binding protein 1                                          | PKC                                 | S313  | 9,211666667 | 0,494011358 | 6 | 8,86        | 0,490475959 | 6 |
| 751 | IKRLRSQVQVS  | Hepatocyte nuclear factor 4-alpha                                   | AMPK                                | S304  | 5,72        | 0,312889757 | 4 | 4,732       | 2,590748154 | 5 |
| 752 | FFPFHSPSRLF  | Crystallin, alpha B                                                 | nd                                  | S19   | 3,94        |             | 1 | 5,37        |             | 1 |
| 753 | MRRSVSEAAALA | Lipase hormone sensitive                                            | nd                                  | S554  | 6,41        | 0,5         | 2 |             |             | 0 |
| 754 | PGTRLSLARMP  | Glial fibrillary acidic protein                                     | CaMKII;PKC;Rho_kinase               | S38   | 6,6         | 0,783677229 | 4 | 6,475       | 0,265       | 2 |
| 755 | CMRNFRSDHL   | Early growth response protein 1                                     | CK2                                 | S301  | 4,4975      | 2,613153028 | 4 | 6,116666667 | 0,267872275 | 3 |
| 756 | MRRQRSAPDLK  | Kinesin family member 1C                                            | CK2                                 | S1092 | 7,42        | 2,126405418 | 4 | 6,5725      | 2,579334943 | 4 |
| 757 | SVPTPSPLGPL  | CK2, alpha 1                                                        | CK2alpha_1                          | Y182  | 3,006       | 2,848498552 | 5 | 7,45        |             | 1 |
| 758 | AEVLPSPRGQR  | DNA topoisomerase II alpha                                          | Proline_directed_kinase             | S1213 | 8,28        | 0,145739494 | 5 | 7,236       | 1,029671792 | 5 |
| 759 | KSKIGSTDNIK  | Microtubule associated protein 2                                    | MARK                                | S1679 | 8,713333333 | 0,303131801 | 6 | 8,683333333 | 0,377830062 | 6 |
| 760 | GSSYGSLMTAH  | NPR-B                                                               | nd                                  | S526  | 5,955       | 0,752512458 | 4 | 5,563333333 | 1,063087746 | 3 |
| 761 | VRRRQSVLHLS  | Aquaporin 2                                                         | PKA                                 | S256  | 7,313333333 | 0,525441613 | 6 | 7,185       | 0,285       | 2 |
| 762 | KKKKGLSDSDN  | Solute carrier family 4, sodium bicarbonate cotransporter, member 4 | PKA                                 | S982  | 6,953333333 | 0,25772509  | 3 | 7,5         | 0,126293309 | 4 |
| 763 | TIDPASPQSSE  | Solute carrier family 9, isoform A1                                 | MAPK14                              | S723  | 6,406666667 | 0,598293871 | 3 | 6,54        |             | 1 |
| 764 | NTGEQSGYHVE  | Beta-2-adrenergic receptor                                          | Insulin_receptor                    | S364  | 7,986       | 0,150943698 | 5 | 7,7175      | 0,110085194 | 4 |
| 765 | RDTRDSEAQRL  | Stomatin                                                            | PKA                                 | S10   | 6,5275      | 0,551242914 | 4 | 6,75        |             | 1 |
| 766 | GLRRSSKFLCK  | Beta-2-adrenergic receptor                                          | PKC                                 | S262  | 10,02       | 0,154056267 | 6 | 9,01        | 0,367287353 | 6 |
| 767 | TKRNSSPPSP   | ATP2B1                                                              | PKA                                 | S1178 | 7,76        | 0,334065862 | 6 | 7,37        | 0,94669953  | 5 |
| 768 | PSMRSSGTRDK  | HOX B7                                                              | CK2alpha1                           | S133  | 8,6575      | 0,235199384 | 4 | 8,026666667 | 0,613994209 | 6 |
| 769 | EDIKSYTVRQ   | PTPN1                                                               | Insulin_receptor                    | Y152  | 3,41        | 3,269872577 | 3 | 6,736666667 | 1,118222796 | 3 |
| 770 | PDPKSKYCGPYK | Aspartylglucosaminidase                                             | UDP-n                               | Y178  | 6,055       | 0,245       | 2 | 6,426666667 | 0,148174072 | 3 |
| 771 | RKGHEYTNIKY  | SHP2                                                                | PDGFRbeta                           | Y542  | 9,865       | 0,312022969 | 6 | 10,402      | 0,422629862 | 5 |
| 772 | IYSGDYRQGR   | c-Mer                                                               | c-Mer                               | Y753  | 0           |             | 1 | 3,09        | 3,09        | 2 |
| 773 | NTTATYAEPYR  | Plakophilin 4                                                       | nd                                  | Y478  | 7,2         |             | 1 | 2,395       | 2,395       | 2 |
| 774 | NegCtrl      | Mixed peptides without STY                                          | na                                  |       |             |             |   |             |             |   |
| 775 | SptCtrl      | Used for production/QC                                              | na                                  |       | 8,1225      | 0,359539636 | 4 | 7,643333333 | 0,526772141 | 6 |
| 776 | PosCtrl      | Mixed kinase substrate peptides                                     | na                                  |       | 0           | 0           | 2 | 5,595       | 0,075       | 2 |
| 777 | ETKSLYPSSEI  | STAM2                                                               | EGFR                                | Y192  | 6,765       | 0,395       | 2 | 7,44        | 1,015209338 | 4 |
| 778 | HVSISYDIPPT  | GAB1                                                                | EGFR;HGFR                           | Y307  | 3,185       | 3,185       | 2 | 5,52        |             | 1 |

|     |              |                                                                |                                                                               |          |             |             |   |             |             |   |
|-----|--------------|----------------------------------------------------------------|-------------------------------------------------------------------------------|----------|-------------|-------------|---|-------------|-------------|---|
| 779 | DSTNEYMDMKP  | KIT                                                            | Choline_kinase                                                                | Y721     | 5,9375      | 0,46299973  | 4 | 2,83        | 2,83        | 2 |
| 780 | KDGRGVVPATI  | STAT6                                                          | IL4                                                                           | Y641     | 6,03        |             | 1 | 6,64        |             | 1 |
| 781 | EEGEMYEDDEE  | Tubulin, beta-4                                                | MAPkinase                                                                     | Y437     | 5,746666667 | 1,033096747 | 3 | 3,89        |             | 1 |
| 782 | MECRNSPVTKT  | Eukaryotic translation initiation factor 4E binding protein 1  | mTOR                                                                          | S65      | 4,99        | 3,529315325 | 3 | 2,325       | 2,325       | 2 |
| 783 | GQESEYGNITY  | SHP1                                                           | c-Abl;Lck                                                                     | Y536     | 7,49        |             | 1 | 7,515       | 0,325       | 2 |
| 784 | DDQEVYDDVAE  | FYB                                                            | Fyn                                                                           | Y595     | 5,136666667 | 0,522961651 | 3 | 0           |             | 1 |
| 785 | LSSNTIRRP    | 6-phosphofructo-2-kinase/fructose-2,6-biphosphatase 2          | pkc                                                                           | T475     | 7,9175      | 0,305971812 | 4 | 7,2675      | 1,03603511  | 4 |
| 786 | AMFPETLDEGM  | Beta-catenin                                                   | CK2beta                                                                       | T102     | 6,31        |             | 1 | 6,453333333 | 1,102733976 | 3 |
| 787 | SSEITTKDLKE  | Prothymosin alpha                                              | nb                                                                            | T14      | 7,2025      | 0,211586271 | 4 | 7,99        | 0,374788829 | 3 |
| 788 | MHRRHTDPVQL  | GRID                                                           | nd                                                                            | T262     | 5,856666667 | 0,426953029 | 3 | 6,84        |             | 1 |
| 789 | SSRRTTLCGTL  | Serine/threonine protein kinase 6                              | PKA                                                                           | T288     | 6,21        |             | 1 | 6,86        |             | 1 |
| 790 | HYLDETEQWEK  | Complement component 3                                         | CK                                                                            | T1031    | 8,413333333 | 0,336683168 | 6 | 8,702       | 0,307662152 | 5 |
| 791 | EGCACTPERMA  | Survivin                                                       | CDC2                                                                          | T34      | 6,335       | 0,615       | 2 | 7,02        |             | 1 |
| 792 | AVQSGTPPEPE  | Nucleolar protein 3                                            | CK2                                                                           | T149     | 4,82        |             | 1 | 4,875       | 0,265       | 2 |
| 793 | NVDRVSIRSIR  | Polymeric immunoglobulin receptor                              | nd                                                                            | S637     | 7,8825      | 0,881174642 | 4 | 6,5175      | 0,994971733 | 4 |
| 794 | GSSSQSGISS   | CHK2                                                           | PKA;PKG                                                                       | S33      | 2,17        | 2,17        | 2 | 0,603333333 | 0,853242183 | 3 |
| 795 | GQLVDSIAKTR  | MAP2K4                                                         | MAP2K4                                                                        | S257     | 6,075       | 0,015       | 2 | 5,69        | 0,58        | 2 |
| 796 | CLTFGSPVLMR  | Flap endonuclease-1                                            | CDC2_Cyclin_A                                                                 | S187     | 3,896666667 | 2,852721897 | 3 | 3,546666667 | 1,896599296 | 3 |
| 797 | LARRPTKGIHE  | Guanine nucleotide binding protein, alpha13                    | PKA                                                                           | T203     | 6,6175      | 0,206926919 | 4 | 6,98        | 0,125698051 | 3 |
| 798 | PFRRHWSICFD  | cAMP specific 3',5'-cyclic phosphodiesterase 4D                | PKA                                                                           | S13      | 6,285       | 0,581055075 | 4 | 5,43        | 1,52        | 2 |
| 799 | AQSLATPVVSV  | Myocyte specific enhancer factor 2C                            | MAPK14                                                                        | T293     | 6,3675      | 0,283140866 | 4 | 1,8         |             | 1 |
| 800 | RPEFTTPEGP   | HBP                                                            | nd                                                                            | T61      | 6,576666667 | 1,051802685 | 3 | 2,556666667 | 2,627373001 | 3 |
| 801 | KGMIKSSRPLR  | Formyl peptide receptor-like 1                                 | nd                                                                            | S236     | 9,19        | 0,161987654 | 5 | 8,433333333 | 0,434076286 | 6 |
| 802 | RRRLSSLRAS   | Ribosomal protein S6                                           | PAK2                                                                          | S236     | 8,871666667 | 0,394774901 | 6 | 8,091666667 | 0,616155193 | 6 |
| 803 | GSKNKSPSKAA  | High mobility group AT-hook 2                                  | Cdc2_kinase                                                                   | S59      | 7,758333333 | 0,309699675 | 6 | 8,15        | 0,197888858 | 5 |
| 804 | PKEKDSPHMQD  | Nuclear transcription factor Y, alpha                          | CDK2                                                                          | S326     | 5,643333333 | 0,933856996 | 3 | 1,992       | 2,526803514 | 5 |
| 805 | YVEKFSYKSIT  | Leukotriene A4 hydrolase                                       | nd                                                                            | S416     | 6,3         | 0,06        | 2 | 7,34        | 0,164164552 | 4 |
| 806 | EFISLSPHEA   | E2F transcription factor 1                                     | CDK7                                                                          | S403     | 6,678       | 0,430134863 | 5 | 7,408       | 0,650796435 | 5 |
| 807 | PVRMSSSTIFST | PAK2                                                           | PAK2                                                                          | S20      | 3,313333333 | 2,343577512 | 3 | 2,67        | 2,710479662 | 4 |
| 808 | MEEPQSDPSVE  | p53                                                            | CK1alpha1                                                                     | S6       | 7,6425      | 0,268456235 | 4 | 6,555       | 0,801420614 | 4 |
| 809 | PGIDLSQVYEL  | ABL                                                            | AKT                                                                           | S465 466 | 9,766666667 | 0,309551647 | 6 | 9,871666667 | 0,230464507 | 6 |
| 810 | LLFACSPPPPAS | CDC 25A                                                        | CDC2                                                                          | S17      | 1,014       | 2,028       | 5 | 2,5425      | 2,611765447 | 4 |
| 811 | SLYASSPGGVY  | Vimentin                                                       | CDC2                                                                          | S56      | 8,051666667 | 0,339186117 | 6 | 8,096       | 0,382444767 | 5 |
| 812 | TGVETSFRKLS  | NFKB1                                                          | IKKalpha                                                                      | S932     | 7,608       | 0,293625612 | 5 | 6,83        | 0,777785317 | 4 |
| 813 | PGPQLSQGVSV  | Nibrin                                                         | nb                                                                            | S343     | 3,512       | 2,955499281 | 5 | 1           | 1,414213562 | 3 |
| 814 | APDEGSDLFYD  | Cell division cycle 34                                         | CK2                                                                           | S203     | 9,033333333 | 0,606483489 | 6 | 8,952       | 0,297751574 | 5 |
| 815 | YSRQFSLEHVH  | Heat-shock transcription factor 1                              | CaMKII                                                                        | S230     | 8,978333333 | 0,21528405  | 6 | 8,721666667 | 0,458454529 | 6 |
| 816 | PVQQPSAFGSM  | Glycogen synthase kinase 3 beta                                | Serum/glucocorticoid_regulated_kinase_3                                       | S21      | 5,906666667 | 0,910103779 | 3 | 2,495       | 2,495       | 2 |
| 817 | PPPQLSPFLQP  | Estrogen receptor, alpha                                       | ERK2                                                                          | S118     | 6,753333333 | 0,39835774  | 3 | 6,781666667 | 0,612927855 | 6 |
| 818 | RQRSTSTPNVH  | RAF1                                                           | PKA;AKT1                                                                      | S259     | 8,883333333 | 0,342669261 | 6 | 8,845       | 0,202792998 | 6 |
| 819 | GSHNSFRLSN   | Protein tyrosine phosphatase, receptor type, alpha             | PKCdelta                                                                      | S189     | 7,916666667 | 0,448317844 | 6 | 8,026666667 | 0,344512538 | 3 |
| 820 | EDGEETCALAS  | Ring finger protein 7                                          | CK2beta                                                                       | T10      | 4,876666667 | 2,369800742 | 6 | 6,5575      | 0,338996681 | 4 |
| 821 | SQETFSDLWKL  | p53                                                            | Camp;Cdk1;CHK2;Pik3_DNA-dependent_protein_kinase_catalytic_subunit_208900.ATR | S20      | 9,51        | 0,148772757 | 6 | 9,428       | 0,173827501 | 5 |
| 822 | TTGGESCDELE  | Occludin                                                       | CK2beta                                                                       | S408     | 8,191666667 | 0,531394915 | 6 | 8,354       | 0,286607746 | 5 |
| 823 | ISGRSLPIMTE  | FKHR                                                           | DYRK1A_kinase                                                                 | S329     | 6,884       | 0,439754477 | 5 | 3,18        | 3,196591935 | 4 |
| 824 | VETQASQGTLQ  | DNA-dependent protein kinase catalytic subunit                 | DNA-dependent_protein_kinase_catalytic_subunit                                | S2612    | 4,09        | 2,341478166 | 5 | 7,13        | 0,21        | 2 |
| 825 | PRRRSIRNAH   | p47-phox                                                       | PKCzeta;PKCalpha;PKCbeta1;PKCdelta                                            | S304     | 9,458333333 | 0,364207664 | 6 | 9,296666667 | 0,383652041 | 6 |
| 826 | IDRTESLNRSI  | Lymphocyte specific protein                                    | MAPKAPkinasell                                                                | S204     | 7,052       | 0,81641656  | 5 | 7,916       | 0,147594038 | 5 |
| 827 | YCSRDSRGHND  | Glutamate receptor ionotropic, N-methyl D-aspartate subunit 2A | PKC                                                                           | S1416    | 7,0275      | 0,532511737 | 4 | 7,6         | 0,854254061 | 4 |
| 828 | DNSSDSDYDLH  | CD5                                                            | Lck;Fyn                                                                       | T453     | 9,036666667 | 0,16038149  | 6 | 9,168       | 0,232155121 | 5 |
| 829 | LLKLASPELER  | c-Jun                                                          | JNK1                                                                          | S73      | 7,526       | 0,360255465 | 5 | 7,736       | 0,373502343 | 5 |
| 830 | EPKRRSARLSA  | HMG14                                                          | Ribosomal_protein_S6_kinase_alpha_3;PKA;PKC                                   | S7       | 9,24        | 0,18734994  | 6 | 8,93        | 0,360832371 | 5 |

|     |              |                                                         |                                                       |            |             |             |   |             |             |   |
|-----|--------------|---------------------------------------------------------|-------------------------------------------------------|------------|-------------|-------------|---|-------------|-------------|---|
| 831 | RPDPSSFSRPR  | Opioid receptor                                         | PKC                                                   | S344       | 8,405       | 0,434424907 | 6 | 8,14        | 0,168720676 | 3 |
| 832 | PIGEDEESES   | Vesicular monoamine transporter 2                       | CK1;CK2                                               | S511       | 7,925       | 0,538199158 | 6 | 7,838       | 0,533119124 | 5 |
| 833 | DINSLYDVSRM  | Phospholipase C, gamma 2                                | Lyn;Lck;Fyn                                           | Y753       | 1,615       | 2,797262054 | 4 | 6,09        | 1,424991228 | 5 |
| 834 | PKDEVYSKYT   | STAT5B                                                  | c-Src                                                 | Y679       | 7,38        | 0,244867311 | 5 | 8,378333333 | 0,394943737 | 6 |
| 835 | KDEGSYTLLEP  | Syndecan 3                                              | Tyrosine_specific_kinase                              | Y361       | 5,2925      | 0,841200779 | 4 | 5,728333333 | 2,590253634 | 6 |
| 836 | TPSAAYLWVGT  | Gelsolin                                                | Csk                                                   | Y603       | 7,466       | 0,422686645 | 5 | 7,183333333 | 0,474435337 | 3 |
| 837 | FPDQAYANSQP  | SIT                                                     | nd                                                    | Y188       | 2,15        | 2,15        | 2 | 3,49        | 3,49        | 2 |
| 838 | NegCtrl      | Mixed peptides without STY                              | na                                                    |            |             |             |   |             |             |   |
| 839 | SptCtrl      | Used for production/QC                                  | na                                                    |            | 9,2375      | 0,327060774 | 4 | 8,711666667 | 0,373783211 | 6 |
| 840 | PosCtrl      | Mixed kinase substrate peptides                         | na                                                    |            | 4,063333333 | 2,181075168 | 3 | 3,61        | 2,556208129 | 3 |
| 841 | DKQVEYLDL    | GAB1                                                    | Insulin_receptor;EGFR;HGFR                            | Y627       | 7,814       | 0,181394597 | 5 | 8,391666667 | 0,531708462 | 6 |
| 842 | KAGNLYDISED  | NR2B                                                    | Fyn                                                   | Y1252      | 7,688       | 0,422629862 | 5 | 8,526666667 | 0,319095945 | 6 |
| 843 | AEPHTYEEPGR  | EphA8                                                   | EphA8                                                 | Y616       | 3,5         | 3,5         | 2 | 3,984       | 3,206696743 | 5 |
| 844 | FTNPVYATLYM  | Low density lipoprotein receptor-related protein 1      | v-Src                                                 | Y4507      | 8,285       | 0,574536045 | 6 | 7,994       | 0,989638318 | 5 |
| 845 | EEDHTYEGLDI  | CD79B                                                   | Lyn;Fyn                                               | Y196       | 8,494       | 0,504325292 | 5 | 9,305       | 0,40198466  | 6 |
| 846 | TTEAIYEEIDA  | TOM1 like 1                                             | Fyn                                                   | Y460       | 8,306666667 | 0,648887938 | 6 | 8,64        | 0,379692858 | 6 |
| 847 | DGSREYVNVSQ  | LAT                                                     | ZAP70                                                 | Y220       |             |             | 0 | 6,186666667 | 0,020548047 | 3 |
| 848 | KIGEGTYGVVY  | CDC2                                                    | Tita: WEE/MYT PK161                                   | T161       | 7,2         | 0,93284511  | 3 | 6,516666667 | 1,548554882 | 3 |
| 849 | DEYNVTPSPPG  | Notch2                                                  | GSK3beta                                              | T2074      |             |             | 0 | 6,836666667 | 0,431225643 | 3 |
| 850 | RKKRYTVVGNP  | LIM domain kinase 1                                     | ROCK1                                                 | T505       | 8,72        | 0,37013511  | 6 | 8,466       | 0,31941196  | 5 |
| 851 | TDDEMTGYVAT  | MAPK14                                                  | MAP2K3                                                | T180       | 0           | 0           | 3 | 4,38        | 1,539242238 | 3 |
| 852 | VLDQYVSSVG   | Bone marrow kinase BMX                                  | c-Src                                                 | Y566       | 5,63        | 1,16        | 2 | 7,663333333 | 0,192930615 | 3 |
| 853 | RRKAATMRERR  | Myogenic differentiation antigen 1                      | PKC                                                   | T115       | 4,29        | 3,215182732 | 3 | 5,373333333 | 1,136378263 | 3 |
| 854 | QSRSTQGVTL   | Myosin phosphatase target subunit 1                     | Rho_kinase;DMPK;ILK                                   | T696       | 4,823333333 | 3,451032052 | 3 | 5,64        |             | 1 |
| 855 | CTHDLYMIMRE  | FGF receptor 3                                          | FGFR3                                                 | Y724       | 0           |             | 1 | 6,34        |             | 1 |
| 856 | EQRNVYKDYRQ  | Dynamin 1                                               | c-Src;v-Src                                           | Y597       | 5,713333333 | 2,169444373 | 3 |             |             | 0 |
| 857 | EKPRLSFADRA  | Protein kinase C, theta                                 | nd                                                    | S676       | 5,26        |             | 1 | 3,44        |             | 1 |
| 858 | NNTSSSPQPKK  | p53                                                     | CDK2                                                  | S315       | 5,415       | 0,485       | 2 | 7,285       | 0,599854149 | 4 |
| 859 | LAHNVSKDNRQ  | Phosphatidylinositol 3 kinase, catalytic subunit, delta | Phosphatidylinositol_3_kinase_catalytic_subunit_delta | 1039 / S10 | 4,76        | 2,795487435 | 4 |             |             | 0 |
| 860 | LAVVGSPPYWMA | Testis specific protein kinase 1                        | Testis_specific_protein_kinase_1                      | S220       | 8,326       | 0,788837119 | 5 | 8,775       | 0,215       | 2 |
| 861 | VAARATLRRSN  | Calcium sensing receptor                                | PKC                                                   | T888       | 8,633333333 | 0,591852084 | 6 | 8,27        | 0,651613382 | 5 |
| 862 | YQMALTPVVVT  | Cyclin-dependent kinase 4                               | Discoidin_domain_receptor                             | T172       | 5,85        | 0,369143152 | 3 | 7,43        | 0,27        | 2 |
| 863 | RPRGYTISDSA  | Tuberin                                                 | AKT1                                                  | T1462      | 6,24        |             | 1 |             |             | 0 |
| 864 | PKGTGYIKTEL  | STAT1                                                   | JAK1;JAK2;TYK2;EGFR;Lck                               | Y701       | 11,14       |             | 1 |             |             | 0 |
| 865 | LRSEFSPSVDA  | c-Mos                                                   | nd                                                    | S16        | 5,97        |             | 1 | 7,14        | 0,200166597 | 3 |
| 866 | QLGPPSPVKMP  | Pituitary tumor-transforming protein 1                  | CDC2                                                  | S165       | 3,39        | 3,39        | 2 | 6,71        |             | 1 |
| 867 | PGLRRSPIKKV  | B-Myb                                                   | CDK2                                                  | S577       | 8,916666667 | 0,09049248  | 6 | 8,542       | 0,164972725 | 5 |
| 868 | QGISFSQPTCP  | Cell cycle checkpoint kinase                            | ATR                                                   | S345       | 3,045       | 3,284177979 | 4 | 4,57        |             | 1 |
| 869 | TRDHPSTANTV  | Opioid receptor mu 1                                    | nd                                                    | S377       | 0           | 0           | 3 | 0,863333333 | 1,220937709 | 3 |
| 870 | DRSDISSTCAN  | TGF beta receptor, type II                              | nd                                                    | S228       | 4,68        |             | 1 | 1,21        |             | 1 |
| 871 | RSGAMSPMSWN  | FADD                                                    | FIST3_70-kDa_kinase                                   | S194       | 3,78        | 3,78        | 2 | 5,79        | 1,08        | 2 |
| 872 | FSEHRTQVSLK  | Cell cycle checkpoint kinase II                         | CHK2                                                  | T432       | 0           | 0           | 2 |             |             | 0 |
| 873 | SEGSSSGRARE  | Androgen receptor                                       | AKT1                                                  | S208       | 2,72        | 2,72        | 2 | 0           | 0           | 2 |
| 874 | GFFSSSESGAP  | Clathrin light polypeptide B                            | CK2                                                   | S11        | 6,842       | 0,708728439 | 5 | 7,718333333 | 0,363291282 | 6 |
| 875 | STQTSPPCQA   | BCL2-interacting protein BIM                            | JNK1                                                  | S118       | 2,484       | 1,463866114 | 5 | 0,286       | 0,572       | 5 |
| 876 | DGRGDSVVYGL  | Secreted phosphoprotein 1                               | Phosphotyrosyl_protein_phosphatase                    | S148       | 8,733333333 | 0,319409177 | 6 | 9,066666667 | 0,286627904 | 6 |
| 877 | RPRRRSSCVSL  | Cyclic GMP inhibited phosphodiesterase B                | AKT1                                                  | S295       | 8,455       | 0,258182752 | 6 | 7,996       | 0,496088702 | 5 |
| 878 | AGDLESPLSEE  | PPAR                                                    | MAPK                                                  | S21        | 8,565       | 0,409867865 | 6 | 8,185       | 0,571977564 | 6 |
| 879 | RSRSGSIVELI  | Huntingtin                                              | AKT                                                   | S421       | 7,235       | 0,447800179 | 4 | 7,4925      | 0,635388661 | 4 |
| 880 | RAREGSFESRY  | Phospholipase C, gamma1                                 | PKCmu                                                 | S1248      | 8,915       | 0,342137886 | 6 | 8,47        | 0,287460142 | 6 |
| 881 | GEKRASSPFRR  | Nucleolar phosphoprotein p130                           | PKA                                                   | S623       | 9,091666667 | 0,455170908 | 6 | 8,488       | 0,193948447 | 5 |
| 882 | SKRRNSEFEIF  | Tryptophan hydroxylase                                  | PRKA1                                                 | S58        | 8,845       | 0,224555116 | 6 | 8,631666667 | 0,20432137  | 6 |

|     |              |                                                         |                                                |       |             |             |   |             |             |   |
|-----|--------------|---------------------------------------------------------|------------------------------------------------|-------|-------------|-------------|---|-------------|-------------|---|
| 883 | ESRSGSNRRER  | Wiskott-Aldrich syndrome protein interacting protein    | PKCtheta                                       | S488  | 8,365       | 0,284648907 | 6 | 7,722       | 0,283365488 | 5 |
| 884 | HSLPLSPASTR  | NFKB1                                                   | GSK3beta                                       | S907  | 7,816       | 0,361696005 | 5 | 7,221666667 | 1,017339941 | 6 |
| 885 | RDRSSAPNVH   | B-Raf                                                   | AKT;SGK                                        | S364  | 6,475       | 0,564350659 | 6 | 4,895       | 2,886472761 | 4 |
| 886 | RLLGHSPLVRN  | CDC 25B                                                 | CDC2                                           | S146  | 6,41        | 1,113126228 | 4 | 6,996       | 0,894887702 | 5 |
| 887 | NQSLLSPLVLE  | Keratin 8                                               | p38_kinase,JNK;p42_kinase                      | S74   | 8,605       | 0,483313218 | 6 | 8,44        | 0,422610932 | 5 |
| 888 | ERMNCSPYSQI  | AKT3                                                    | Pyruvate_dehydrogenase_kinase,_isoenzyme_1     | S120  | 3,975       | 2,318129634 | 4 | 3,77        | 2,669619199 | 3 |
| 889 | KSKKYSDVEVP  | Adducin 1                                               | PKA                                            | S408  | 7,968333333 | 0,900803654 | 6 | 7,945       | 0,513638978 | 6 |
| 890 | VVRLSTQFTA   | Perilipin                                               | PKA                                            | S81   | 4,913333333 | 3,984782163 | 3 | 7,46        | 2,074162482 | 4 |
| 891 | SPPRSSLRSS   | Transcription elongation factor A- like1                | PKC;GSK3                                       | S37   | 9,368       | 0,34970845  | 5 | 8,911666667 | 0,330928828 | 6 |
| 892 | SGDDVSEQDVP  | TFIIA-alpha/beta like factor                            | CK2                                            | S423  | 6,1625      | 0,361204582 | 4 | 7,153333333 | 0,615431195 | 3 |
| 893 | QHRSSSAPHH   | Calcium channel voltage dependent beta 2 subunit        | DNA-dependent_protein_kinase_catalytic_subunit | S478  | 8,626666667 | 0,48230926  | 6 | 8,011666667 | 0,837285628 | 6 |
| 894 | KPKKKKSCLLL  | Ras related protein 1A                                  | PKA                                            | S180  | 8,855       | 0,546038765 | 6 | 8,494       | 0,376435918 | 5 |
| 895 | GGRGSRARNL   | Heterogeneous nuclear ribonucleoprotein K               | PKCdelta                                       | S302  | 8,766666667 | 0,308040401 | 6 | 7,994       | 0,409125897 | 5 |
| 896 | PTAPLSPMSPP  | Connexin 43                                             | ERK1                                           | S279  | 0           |             | 1 | 4,5075      | 2,604048531 | 4 |
| 897 | QVKALYDFLPR  | Protein tyrosine kinase TXK                             | Protein_tyrosine_kinase_TXK                    | Y91   | 7,362       | 0,481763427 | 5 | 7,266666667 | 0,27329268  | 3 |
| 898 | ADENYKQATH   | SYK                                                     | SYK                                            | Y526  | 5,844       | 1,148992602 | 5 | 5,31        | 0,303424895 | 3 |
| 899 | GTDLEYLKKVR  | O-linked N-acetylglucosamine transferase                | Tyrosine_kinase                                | T989  | 5,26        |             | 1 | 3,993333333 | 2,880975915 | 3 |
| 900 | SSGEWYQNFQP  | CD6                                                     | nd                                             | Y629  | 4,97        |             | 1 |             |             | 0 |
| 901 | DADENYFINEE  | Phosphatidylinositol 3-kinase, regulatory gamma subunit | nd                                             | Y341  | 5,838       | 0,88454282  | 5 | 6,775       | 0,775       | 2 |
| 902 | NegCtrl      | Mixed peptides without STY                              | na                                             |       |             |             |   |             |             |   |
| 903 | SptCtrl      | Used for production/QC                                  | na                                             |       | 8,158333333 | 0,228795153 | 6 | 7,742       | 0,478430768 | 5 |
| 904 | PosCtrl      | Mixed kinase substrate peptides                         | na                                             |       | 1,95        | 1,95        | 2 | 2,86        |             | 1 |
| 905 | DIDGQYAMTRA  | Beta-catenin                                            | pp60-src                                       | Y86   | 5,5         |             | 1 | 1,585       | 1,585       | 2 |
| 906 | IPSPYAPFAA   | Guanine nucleotide releasing factor 2                   | Hck                                            | Y522  | 6,175       | 1,585       | 2 | 5,98        |             | 1 |
| 907 | RQGKDYVGAIP  | VEGF receptor 2                                         | VEGF_receptor_2                                | Y951  | 5,61        |             | 1 |             |             | 0 |
| 908 | PYRSPPPYVPP  | Dystrophin associated glycoprotein 1                    | c-Src                                          | Y892  | 0           |             | 1 |             |             | 0 |
| 909 | LTTGVVVKMPP  | CD152                                                   | JAK2,_Protein_tyrosine_kinase_TXK              | Y201  | 5,975       | 0,905       | 2 | 2,645       | 2,645       | 2 |
| 910 | SSDDDYDDVDI  | HPK1                                                    | SYK                                            | Y381  | 6,355       | 1,025       | 2 | 6,56        | 0,414487636 | 3 |
| 911 | NSKRDTYGCST  | PZR                                                     | SHP2                                           | Y200  | 0,99        | 0,99        | 2 | 0           |             | 1 |
| 912 | DKSSAHSY     | Peripherin                                              | nd                                             | Y470  | 0           |             | 1 | 2,78        | 2,78        | 2 |
| 913 | NYIPETPPPGY  | SMAD2                                                   | ERK                                            | T220  | 7,165       | 0,4140954   | 4 | 7,63        | 0,424578222 | 6 |
| 914 | APAAPTAAPA   | p53                                                     | JNK1                                           | T81   | 0           | 0           | 2 | 2,2         |             | 2 |
| 915 | PNSSKTYGIKW  | Calpain, large polypeptide L1                           | nd                                             | S360  | 6,8425      | 0,249937492 | 4 | 7,3425      | 0,336999629 | 4 |
| 916 | IGDELYLEPLE  | RAD9                                                    | ABL                                            | Y28   | 7,2425      | 0,665558976 | 4 | 7,11        | 0,15        | 2 |
| 917 | IEQWFTEDPGP  | p53                                                     | ERK2                                           | T55   | 7,25        | 0,64        | 2 | 7,08        | 0,479040708 | 5 |
| 918 | PSEVPTPKRPR  | High mobility group AT-hook 1                           | CDC2_kinase                                    | T52   | 5,616666667 | 1,230401922 | 3 | 4,626666667 | 1,806752765 | 3 |
| 919 | PSGLLTPQSG   | Cyclin E1                                               | nd                                             | T395  |             |             | 0 | 5,18        | 1,42        | 2 |
| 920 | GKRHRYSVLSS  | Antisense ERCC1                                         | PKA                                            | Y80   | 6,916666667 | 0,926726617 | 3 | 7,2175      | 0,74045172  | 4 |
| 921 | SYSHHSGLEYA  | Caveolin 2                                              | c-Src                                          | Y19   | 7,236       | 0,554818889 | 5 | 7,458       | 0,203607465 | 5 |
| 922 | APAYLSSPLAL  | IKK Gamma                                               | IKKbeta                                        | S376  | 6,545       | 1,064459957 | 4 | 6,36        | 0,818901704 | 4 |
| 923 | AWTADSGEGDF  | Fibrinogen, alpha chain                                 | nd                                             | S22   | 8,384       | 0,230616565 | 5 | 8,16        | 0,379209705 | 5 |
| 924 | ESLDQSMEEEEE | CTD phosphatase, subunit 1                              | CK2                                            | S575  | 6,572       | 0,342426634 | 5 | 4,87        |             | 1 |
| 925 | SVSVETQGDDW  | Hematopoietic cell specific LYN substrate 1             | CK2alpha_1                                     | T16   | 7,87        | 0,266983146 | 5 | 7,69        | 0,556309267 | 5 |
| 926 | CRIGGSRRERS  | EP4 receptor                                            | PKC                                            | S354  | 5,595       | 0,325       | 2 | 7,48        |             | 1 |
| 927 | ALVRGTPVRGA  | Sam68                                                   | CDC2                                           | T317  | 4,86        | 1,8         | 2 | 0           |             | 1 |
| 928 | MRGILYAAPQL  | CD19                                                    | Lyn_kinase                                     | Y409  | 7,975       | 0,335       | 2 | 4,076666667 | 2,984117215 | 3 |
| 929 | CSSLSSLSAE   | APC                                                     | CK1epsilon                                     | S1279 | 6,36        |             | 1 | 6,76        |             | 1 |
| 930 | SQKYSFDTKS   | PAK1                                                    | PAK1                                           | S144  | 7,9075      | 0,110312057 | 4 | 7,881666667 | 0,394648226 | 6 |
| 931 | PTRKISASEFD  | Phosphodiesterase 5A                                    | cGMP_dependent_protein_kinase                  | S102  | 2,563333333 | 0,48230926  | 3 | 4,1175      | 2,398003075 | 4 |
| 932 | IIRQPSEEEII  | PEA15                                                   | Akt;CaMKII                                     | S116  | 7,262       | 0,36035538  | 5 | 7,62        | 0,351454122 | 5 |
| 933 | RCRLLSDCANV  | Crystallin beta A2                                      | nd                                             | S31   | 2,158       | 1,909569585 | 5 | 4,83        |             | 1 |
| 934 | ALSTDSIERLP  | Pyruvate dehydrogenase kinase, isoenzyme 1              | Pyruvate_dehydrogenase_kinase,_isoenzyme_1     | S393  | 5,536666667 | 0,726100697 | 3 | 7,345       | 0,185       | 2 |

|     |             |                                                         |                                                         |         |             |             |   |             |             |   |
|-----|-------------|---------------------------------------------------------|---------------------------------------------------------|---------|-------------|-------------|---|-------------|-------------|---|
| 935 | GALSNSESIPT | AMSH                                                    | Bone_morphogenetic_protein_receptor_type_IB             | S245    | 5,033333333 | 0,250377493 | 3 | 0           | 0           | 3 |
| 936 | IFRRPSLPCIS | Cyclic GMP inhibited phosphodiesterase B                | PKA                                                     | S318    | 5,84        | 1,71866227  | 4 | 4,95        |             | 1 |
| 937 | LQEVLSSENG  | CHOP                                                    | MAPK14                                                  | S79     | 7,26        | 0,350257048 | 5 | 7,855       | 0,729743105 | 4 |
| 938 | KTVNESASLRE | Insulin receptor                                        | Protein_kinase_C_alpha                                  | S1064   | 2,1125      | 2,114986702 | 4 | 1,576666667 | 2,229743383 | 3 |
| 939 | VSRSTFRGGM  | Keratin 18                                              | CAMK;Ribosomal_protein_S6_kinase_alpha3;PKCepsilon      | S52     | 7,4125      | 0,087856417 | 4 | 6,926       | 0,443738662 | 5 |
| 940 | IVPGKSPTRKK | RAP1 GTPase activating protein 1                        | CDC2                                                    | S484    | 8,33        | 0,49149432  | 6 | 7,7         | 0,470956474 | 6 |
| 941 | HSIYSSDEDDE | c-Myb                                                   | ERK2                                                    | S532    | 7,593333333 | 0,348982648 | 6 | 7,5025      | 0,227637321 | 4 |
| 942 | KSEPIPPRDR  | Myocyte specific enhancer factor 2A                     | CDK5                                                    | S408    | 5,812       | 1,758083047 | 5 | 5,1975      | 1,001333486 | 4 |
| 943 | APERASSVYTR | CCR5                                                    | GRK                                                     | S336    | 8,616666667 | 0,305923011 | 6 | 7,845       | 0,582773541 | 4 |
| 944 | RPPTLSPIPHI | Retinoblastoma 1                                        | Cyclin_D1;Cdk4                                          | S780    | 7,391666667 | 0,326211417 | 6 | 7,4275      | 0,630133914 | 4 |
| 945 | RKGYRSQRGHS | Vitronectin                                             | PKC                                                     | S381    | 9,193333333 | 0,251639071 | 6 | 8,473333333 | 0,425936876 | 6 |
| 946 | EKRKNSILNPI | CFTR                                                    | PKC                                                     | S686    | 7,405       | 0,205608852 | 4 | 6,91        | 0,43        | 2 |
| 947 | RDRHLSFSGSG | CD44                                                    | PKC                                                     | S291    | 7,723333333 | 0,284468315 | 6 | 6,58        | 1,45        | 2 |
| 948 | SMPAFSPGPGI | Sterol regulatory element binding transcription factor1 | Sterol_regulatory_element_binding_transcription_factor1 | S117    | 4,49        | 1,710511619 | 4 | 4,36        | 3,086886241 | 3 |
| 949 | RERKSSAPSHS | GAB2                                                    | AKT1                                                    | S159    | 6,41        | 0,461605893 | 5 | 5,16        | 0,06        | 2 |
| 950 | LEPQKSLGDEG | Phospholipase C, beta 3                                 | CaMKII                                                  | S537    | 6,8         | 0,324037035 | 3 | 7,075       | 0,025       | 2 |
| 951 | VSEDNSEDEIS | Acetyl-CoA carboxylase alpha                            | CK2                                                     | S29;S66 | 7,861666667 | 0,368303166 | 6 | 8,02        | 0,18547237  | 3 |
| 952 | DSMANSFVGT  | MEK1                                                    | p74RAF-1                                                | S222    | 6,616666667 | 0,084983659 | 3 | 7,68        |             | 1 |
| 953 | DIQLSSEEND  | Asialoglycoprotein receptor 2                           | PKC                                                     | S12     | 8,0125      | 0,706235619 | 4 | 7,89        | 0,335797558 | 5 |
| 954 | MQRKLSVALAF | ATP-binding cassette, subfamily A, member 1             | PKA                                                     | S1042   | 4,855       | 1,235       | 2 | 3,8525      | 2,304467129 | 4 |
| 955 | AKKTLSEVERD | Sperm associated antigen 1                              | PKC                                                     | S317    | 8,11        |             | 1 | 6,61        | 0,22        | 2 |
| 956 | KERWGSNELPA | Sarcoplasmic/endoplasmic reticulum calcium ATPase 2     | CAMKII                                                  | S38     | 5,67        |             | 1 | 5,5         |             | 1 |
| 957 | HLRSESQRQR  | Guanine nucleotide binding protein, alpha Z polypeptide | PKC                                                     | S27     | 8,468333333 | 0,195056972 | 6 | 8,01        | 0,349342239 | 5 |
| 958 | DDGRVSYPLCF | Glia maturation factor beta                             | PKC                                                     | S72     | 8,68        | 0,433282048 | 6 | 7,881666667 | 0,504823952 | 6 |
| 959 | ASVPPSPSLSR | Glycogen synthase 1                                     | GSK3beta                                                | S645    | 8,59        | 0,328481354 | 6 | 7,852       | 0,160299719 | 5 |
| 960 | KNKPRSPVVEL | Beta-adrenergic receptor kinase1                        | MAPkinase                                               | S670    | 7,16        | 0,765462823 | 6 | 5,978       | 3,008444116 | 5 |
| 961 | AENPEYLGLDV | ErbB2                                                   | ERBB2;EGFR                                              | Y1248   | 6,473333333 | 0,10402991  | 3 | 6,72        |             | 1 |
| 962 | FIGEYVHVNA  | Hepatocyte growth factor receptor                       | HGFR                                                    | Y1349   | 5,6         | 0,93        | 2 | 6,67        |             | 1 |
| 963 | SETDDYAEIID | FAK                                                     | FAK                                                     | Y397    | 7,273333333 | 0,7825741   | 3 | 6,966666667 | 0,650350333 | 3 |
| 964 | VDSGVYAVPPP | p130CAS                                                 | nd                                                      | Y410    | 5,305       | 0,055       | 2 | 3,553333333 | 2,54172295  | 3 |
| 965 | SSTHYLLPER  | ACK                                                     | nd                                                      | Y858    | 6,941666667 | 0,367033907 | 6 | 6,9475      | 0,549198279 | 4 |
| 966 | NegCtrl     | Mixed peptides without STY                              | na                                                      |         |             |             |   |             |             |   |
| 967 | SptCtrl     | Used for production/QC                                  | na                                                      |         | 6,62        | 0,743740546 | 4 | 6,23        | 0,553714728 | 3 |
| 968 | PosCtrl     | Mixed kinase substrate peptides                         | na                                                      |         | 5           |             | 1 | 0,14        |             | 1 |
| 969 | EANSHYGHND  | CD31                                                    | Lck;Csk                                                 | Y663    | 6,24        |             | 1 | 6,35        | 0,227596134 | 3 |
| 970 | IEDNEYTAREG | Lck                                                     | nd                                                      | Y411    | 5,885       | 0,555       | 2 | 5,6         |             | 1 |
| 971 | SEMTGYVTRW  | MAPK12                                                  | MAP2K3                                                  | Y185    | 8,023333333 | 0,434843522 | 6 | 7,313333333 | 0,541130504 | 3 |
| 972 | SSGADYPDELQ | Trypsin 1                                               | nd                                                      | Y154    | 6,806666667 | 1,179896417 | 3 | 6,05        |             | 1 |
| 973 | SAEPQYQPGDQ | Fgr                                                     | Csk                                                     | Y523    | 5,59        | 0,98        | 2 | 6,29        | 0,19        | 2 |
| 974 | AFPVSYSSSGA | Ret                                                     | Ret                                                     | Y687    | 2,455       | 2,021045522 | 4 | 4,856666667 | 1,468703132 | 3 |
| 975 | ENFDDYMKEVG | Fatty acid binding protein 4                            | Tyrosyl_kinase                                          | Y20     | 2,756666667 | 2,828431053 | 3 | 2,625       | 2,625       | 2 |
| 976 | YYEGYAAAGPG | LPP                                                     | nd                                                      | Y301    | 6,77        |             | 1 | 2,395       | 2,395       | 2 |
| 977 | YLTQETNKVET | Parathyroid hormone related protein                     | CDK2                                                    | T108    | 3,86        | 2,97        | 2 | 7,09        |             | 1 |
| 978 | DVPLLTSSKE  | C ets 1 protein                                         | HGF                                                     | T38     | 7,054       | 0,463836178 | 5 | 7,038       | 0,682067445 | 5 |
| 979 | ASKMDTCCSNL | Protease activated receptor 1                           | nd                                                      | T410    | 2,94        | 2,94        | 2 | 5,825       | 0,045       | 2 |
| 980 | MFRNYVTPVN  | Grb2                                                    | EGFR;Bcr/Abl                                            | Y209    | 4,22        | 1,699078181 | 3 | 6,41        |             | 1 |
| 981 | RKRRTSGLHP  | BRCA1                                                   | AKT1                                                    | S509    | 7,423333333 | 0,10143416  | 3 | 6,77        | 1,26        | 2 |
| 982 | LRGSATRALPP | Casein kinase 1, epsilon                                | CK1epsilon                                              | S368    | 4,54        |             | 1 | 0           | 0           | 2 |
| 983 | VYPTKTFPNLY | Ectonucleotide pyrophosphatase /phosphodiesterase 2     | nd                                                      | T210    | 6,48        |             | 1 | 6,21        | 0,876622306 | 3 |
| 984 | TDRSPYEKVSA | Mucin 1 transmembrane                                   | EGFR                                                    | Y1229   | 5,62        | 0,3         | 2 | 5,98        |             | 1 |
| 985 | DHYRYSDDTDS | PTEN                                                    | AKT1                                                    | S380    | 6,3725      | 0,58780843  | 4 | 6,61        | 0,387384391 | 3 |
| 986 | LDSAQSPGSPW | CDX2                                                    | MAPkinase                                               | S60     | 6,993333333 | 0,580880558 | 3 | 6,94        | 0,606259021 | 4 |

|      |             |                                                               |                       |       |             |             |   |             |             |   |
|------|-------------|---------------------------------------------------------------|-----------------------|-------|-------------|-------------|---|-------------|-------------|---|
| 987  | KEEKGSPLNAA | PTPN1                                                         | CK2                   | S352  | 6,51        |             | 1 | 4,5125      | 1,748233037 | 4 |
| 988  | HTGFLTEYVAT | ERK2                                                          | ERK2                  | T185  | 7,67        | 0,221359436 | 4 | 7,293333333 | 0,269917683 | 6 |
| 989  | GTLFSTTPGGT | Eukaryotic translation initiation factor 4E binding protein 1 | MAPkinase             | T45   | 3,1         | 2,196421332 | 3 | 1,753333333 | 1,475586512 | 3 |
| 990  | PDVPRTPVGKF | CDC25C                                                        | Polo_like_kinase      | S198  | 7,69        | 0,89506983  | 4 | 7           | 0,560133913 | 4 |
| 991  | SQPGHTPHATA | Bcl 2                                                         | nd                    | T56   | 5,396666667 | 0,685338521 | 3 | 5,1         | 1,716726536 | 4 |
| 992  | EDEESYDTESE | I-Kappa-B-alpha                                               | CK2                   | S288  | 7,0475      | 0,212294018 | 4 | 6,89        | 0,775671752 | 3 |
| 993  | QFITNSEEVRL | MAD2 mitotic arrest deficient-like 1                          | nd                    | S178  | 6,43        | 0,512132795 | 5 | 6,816       | 0,429259828 | 5 |
| 994  | GQVIMSIRTKL | Ribosomal protein L10                                         | Ribosomal_protein_L10 | S137  | 8,201666667 | 0,470014775 | 6 | 7,5525      | 0,322519379 | 4 |
| 995  | KFDNTNSHDDA | Growth hormone 1                                              | nd                    | S176  | 5,125       | 1,007906246 | 4 | 6,475       | 0,145       | 2 |
| 996  | TTAAHSLVGTP | Serine/threonine protein kinase Nek6                          | Nek9                  | S206  | 5,02        |             | 1 | 2,013333333 | 2,847283306 | 3 |
| 997  | LCQAFSDVILA | Cyclin B1                                                     | Polo_like_kinase      | S147  | 8,081666667 | 0,223339552 | 6 | 7,24        | 0,707837081 | 6 |
| 998  | SFGEPSYPEVF | Presenilin 2                                                  | CK2                   | S335  | 9,325       | 0,400697309 | 6 | 8,722       | 0,137753403 | 5 |
| 999  | MARGSVSDEEM | Lymphocyte cytosolic protein 1                                | PKA                   | S5    | 6,504       | 0,997047642 | 5 | 6,508       | 0,970492658 | 5 |
| 1000 | LSSSESPQRDP | Cell division autoantigen 1                                   | CDK2                  | S20   | 0           |             | 1 | 0           |             | 1 |
| 1001 | LRQLRSPRRAQ | Ras associated protein Rab4                                   | CDC2                  | S204  | 8,848       | 0,215907388 | 5 | 8,362       | 0,288956744 | 5 |
| 1002 | PLNSVSPSPLM | Estrogen receptor, alpha                                      | MAT1                  | S104  | 1,7575      | 1,757588902 | 4 | 5,375       | 1,195       | 2 |
| 1003 | KQFLISPPASP | Down syndrome critical region protein 1                       | MAPkinase             | S112  | 6,246666667 | 0,771549667 | 3 | 6,76        | 0,584593876 | 4 |
| 1004 | SVVSEISSV   | 5-hydroxytryptamine receptor 2C                               | nd                    | S456  | 6,762       | 0,644093161 | 5 | 7,11        | 0,276134025 | 4 |
| 1005 | GSDSDSEVDKK | PC4                                                           | CK2alpha_1            | S19   | 5,356       | 0,57822487  | 5 | 5,912       | 0,70169509  | 5 |
| 1006 | NASASSLKKKQ | Fascin 1                                                      | PKC                   | S38   | 7,986666667 | 0,619399351 | 6 | 7,778       | 0,70556077  | 5 |
| 1007 | RKRHNSISEAK | Phospholipase C, beta 3                                       | PKG                   | S1105 | 8,665       | 0,244523346 | 6 | 8,481666667 | 0,43521706  | 6 |
| 1008 | ENSPKSPKVTG | Centromeric protein E                                         | nd                    | S2570 | 2,19        | 2,19        | 2 | 5,16        | 0,858108385 | 4 |
| 1009 | TLPRNSGAGAS | Glutamate receptor ionotropic, AMPA 1                         | CAMKII                | S863  | 0           | 0           | 4 | 0,68        | 1,177794549 | 4 |
| 1010 | RSYVSSGEMMV | Glial fibrillary acidic protein                               | PKC;RHO_kinase;CAMKII | S17   | 6,77        | 0,18069311  | 4 | 7,09        | 0,23        | 2 |
| 1011 | QVSSLSESEES | Activating transcription factor 1                             | CK2                   | S36   | 8,278333333 | 0,327994749 | 6 | 7,91        | 0,501238466 | 5 |
| 1012 | TDGNRSSHRL  | BH3 interacting domain death agonist                          | CK1;CK2               | S65   | 4,4         | 2,238008043 | 5 | 3,093333333 | 2,96963896  | 3 |
| 1013 | SRVTFSEDEI  | NIPP1                                                         | CK2                   | S204  | 7,946       | 0,356796861 | 5 | 7,488       | 0,424895281 | 5 |
| 1014 | SSQRVSSYRRT | Desmin                                                        | Aurora_kinase_B       | S12   | 8,9         | 0,208326667 | 6 | 8,293333333 | 0,688613744 | 6 |
| 1015 | RAHGLSLIPST | Microphthalmia associated transcription factor                | GSK3beta              | S399  | 2,285       | 2,447452757 | 4 | 2           | 2,007045922 | 6 |
| 1016 | LSGRGSNYGSL | NPRA                                                          | nd                    | S538  | 8,592       | 0,391070326 | 5 | 8,035       | 0,870550592 | 6 |
| 1017 | RFYPESYKST  | Occludin                                                      | PKC                   | S340  | 9,583333333 | 0,259208196 | 6 | 9,136666667 | 0,415237549 | 6 |
| 1018 | LPRASSLNENV | PPP1R9B                                                       | PKA                   | S100  | 6,785       | 0,663079935 | 4 | 6,6475      | 0,895638739 | 4 |
| 1019 | YETFKSIMKKS | NFKB3                                                         | PKCzeta               | S298  | 6,595       | 0,845       | 2 | 4,1125      | 2,702622569 | 4 |
| 1020 | ISPPASPPVGW | Down syndrome critical region protein 1                       | GSK3                  | S108  | 7,693333333 | 0,081785628 | 3 | 7,39        | 0,237592087 | 4 |
| 1021 | REKKFSTKSDV | Csk                                                           | PKA                   | S364  | 8,118333333 | 0,501411895 | 6 | 7,866       | 0,27861084  | 5 |
| 1022 | PSRSYSERDFE | Solute carrier family anion exchange, member 3                | PKCepsilon            | S67   | 8,486666667 | 0,391180549 | 6 | 7,992       | 0,465549138 | 5 |
| 1023 | PVAPLSPARLQ | ELK3                                                          | MAPK14;EphB2          | S363  | 7,934       | 0,463922407 | 5 | 7,045       | 1,249916664 | 6 |
| 1024 | ARVLGSEGEIE | LIG1                                                          | CK2alpha1             | S66   | 7,56        | 0,242487113 | 5 | 7,34        | 0,331360831 | 3 |
